# Supplementary material
Source: PubMed Central journal article supplement (PMC4109272)
Supplement: NIHMS602125-supplement-Supporting_Information.pdf [file NIHMS602125-supplement-Supporting_Information.pdf]

## Supporting Information

|                       |      |
|-----------------------|------|
| General information   | S-1  |
| Experimental          | S-2  |
| HPLC Data             | S-18 |
| NMR Spectra           | S-39 |
| X-ray Crystallography | S-70 |
| References            | S-80 |

### I. General Information

Unless otherwise noted, all reagents were purchased from commercial suppliers and used without further purification. Chiral anion phase-transfer (CAPT) pyrroloindolization reactions were performed in 2-dram (15 X 60 mm) vials equipped with a screw cap and stirred using a magnetic Teflon stir bar (1/2" X 5/16"), placed on the surface of a magnetic stir plate. Due to the heterogeneous nature of these reactions, it is important that fast and efficient stirring be maintained over the course of the reaction in order to obtain optimal results. Methyl *tert*-butyl ether (MTBE) was used as purchased from Fischer Scientific. Thin-layer chromatography (TLC) analysis of reaction mixtures was performed using Merck silica gel 60 F254 TLC plates, and visualized under UV or by staining with ceric ammonium molybdate or KMnO<sub>4</sub>. Column chromatography was performed on Merck Silica Gel 60 Å, 230 X 400 mesh. Nuclear magnetic resonance (NMR) spectra were recorded using Bruker AV-600, AV-500, DRX-500, AVQ-400, AVB-400 and AV-300 spectrometers. <sup>1</sup>H and <sup>13</sup>C chemical shifts are reported in ppm downfield of tetramethylsilane and referenced to residual solvent peak (CHCl<sub>3</sub>, δH = 7.26 ppm and δC = 77.0 ppm; DMSO, δH = 2.50 and δC = 39.5 ppm; CH<sub>2</sub>Cl<sub>2</sub>, δH = 5.32 and δC = 53.8 ppm). Multiplicities are reported using the following abbreviations: s = singlet, d = doublet, t = triplet, q = quartet, app t = apparent triplet, m = multiplet, br = broad resonance. Solvent abbreviations are reported as follows: MTBE = Methyl *tert*-butyl ether, EtOAc = ethyl acetate, hex = hexanes, DCM = dichloromethane, Et<sub>2</sub>O = diethyl ether, MeOH = methanol, *i*PrOH = isopropanol, THF = tetrahydrofuran, DMF = N,N-dimethylformamide, Et<sub>3</sub>N = triethylamine. Mass spectral data were obtained from the Micro-Mass/Analytical Facility operated by the College of Chemistry, University of California, Berkeley or by usage of an Agilent Time of Flight (Q-TOF) mass spectrometer in ESI mode. Enantiomeric excesses were measured on a Shimadzu VP Series Chiral HPLC using Chiralpak IA, IB, or IC columns. The syntheses of TRIP, H8-TRIP, TCYP, and STRIP, have been previously reported. **Caution:** Although we have not experienced any problems during the preparation and handling of the aryldiazonium tetrafluoroborates reported herein, appropriate safety precautions should be taken due to the explosive nature of diazonium salts, including the use of a blast shield. Racemic CAPT pyrroloindolization products were synthesized utilizing racemic TRIP or under homogeneous conditions in the absence of phase-transfer catalyst with acetone as a solvent.

### I. Experimental

#### A. General procedure for synthesis of tryptamine derivatives S11-S15

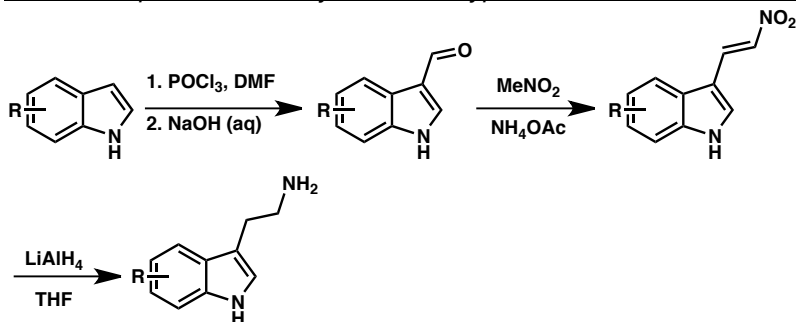

The synthesis of substituted tryptamines was adapted from the procedure of Dixon, *et al.*<sup>2</sup> To an oven-dried 250-mL round bottom flask was added dry DMF (20 mL) and a stir bar. The flask was cooled to 0 °C and POCl<sub>3</sub> (2.80 mL, 30 mmol, 1.5 equiv) was added dropwise. The solution was stirred for 15 min at this temperature before the addition of the

substituted indole (2.70 g, 20 mmol, 1.0 equiv) dissolved DMF (20 mL) over 15 min. The solution was subsequently heated at 38 °C for 1 hour, then cooled to rt at which point ice water (40 mL) was carefully added, followed by aqueous 1 N NaOH (20 mL), with vigorous stirring. Additional 1 N NaOH was added until the reaction mixture maintained a yellow color. The reaction was then heated at 170 °C and refluxed for 5 minutes before being allowed to cool to rt and stirred overnight. The mixture was then extracted with EtOAc (3 x 50 mL), and the combined organic layers were washed with water (2 x 75 mL), brine (2 x 70 mL), dried over magnesium sulfate, filtered, and concentrated to yield the aldehyde as a solid which required no further purification.

To an oven-dried 250-mL round bottom flask was added the crude aldehyde (14.6 mmol, 1.0 equiv), nitromethane (50 mL), and ammonium acetate (3.38 g, 43.9 mmol, 3.0 equiv). The reaction was then refluxed for 90 min with vigorous stirring. After this time, the reaction was concentrated to dryness *via* rotary evaporation and subsequently dissolved in EtOAc (60 mL). The organic layer was washed with water (50 mL), brine (50 mL), dried over magnesium sulfate, filtered and concentrated. The crude material was purified by flash column chromatography in 1:1 ethyl acetate/hexanes to afford the nitro alkene.

To an oven-dried 1-L round bottom flask containing a stir-bar was added solid LAH pellets (3.33 g, 87.84 mmol, 6.0 equiv) followed by dry THF (145 mL). The mixture was stirred in an ice bath to cool it to 0 °C. The nitro alkene (14.6 mmol, 1.0 equiv) was dissolved in THF (145 mL) and transferred to the cool LAH mixture *via* cannula over a period of 20 min. The mixture was allowed to slowly warm to rt and stir for 40 h. After this time, the reaction was cooled back to 0 °C before the slow addition of water (~15 mL) until the cessation of bubbles. Then the mixture was diluted with Et<sub>2</sub>O (150 mL) followed by addition of saturated Rochelle's salt solution (200 mL). This mixture was then vigorously stirred for 24 hours. The layers were then separated and the aqueous layer was extracted with Et<sub>2</sub>O (1 x 100 mL) and the collected organic layers extracted with 2 N HCl (3 x 75 mL). The aqueous layer was then cooled in an ice bath and basified with 3M KOH until pH ~ 10. This basic mixture was then extracted with Et<sub>2</sub>O (3 x 75 mL), dried over magnesium sulfate, filtered, and concentrated to afford the pure tryptamine derivatives.

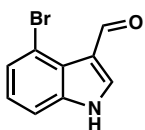

**SI1**

Following the first step of the general procedure for the synthesis of tryptamine derivatives, compound **SI1** was isolated as a pale yellow solid in 52% yield whose NMR matched the published spectra.<sup>13</sup>

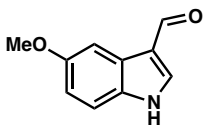

**SI2**

Following the first step of the general procedure for the synthesis of tryptamine derivatives, compound **SI2** was isolated as a pale yellow solid in 79% yield whose NMR matched the published spectra.<sup>14</sup>

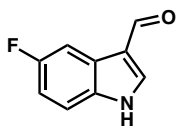

**SI3**

Following the first step of the general procedure for the synthesis of tryptamine derivatives, compound **SI3** was isolated as a pale yellow solid in 73% yield whose NMR matched the published spectra.<sup>2</sup>

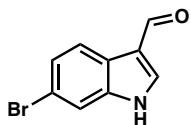

**SI4**

Following the first step of the general procedure for the synthesis of tryptamine derivatives, compound **S14** was isolated as a pale brown solid in 82% yield whose NMR matched the published spectra.<sup>3</sup>

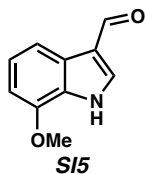

Following the first step of the general procedure for the synthesis of tryptamine derivatives (refluxed for 10 minutes), compound **S15** was isolated as a pale yellow powder in 88% yield whose NMR matched the published spectra.<sup>4</sup>

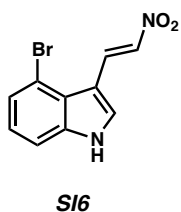

Following the second step of the general procedure for the synthesis of tryptamine derivatives, compound **S16** was isolated as a in 47% yield whose NMR matched the published spectra.<sup>13</sup>

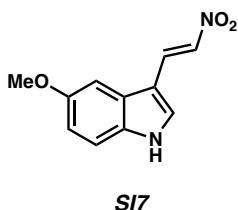

Following the second step of the general procedure for the synthesis of tryptamine derivatives, compound **S17** was isolated as a solid in 98% yield whose NMR matched the published spectra.<sup>14</sup>

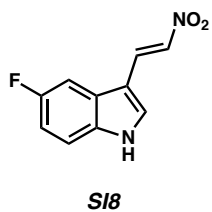

Following the second step of the general procedure for the synthesis of tryptamine derivatives, compound **S18** was isolated as a solid in 71% yield whose NMR matched the published spectra.<sup>2</sup>

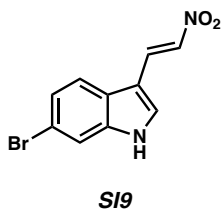

Following the second step of the general procedure for the synthesis of tryptamine derivatives, compound **S19** was isolated as a solid in 95% yield whose NMR matched the published spectra.<sup>3</sup>

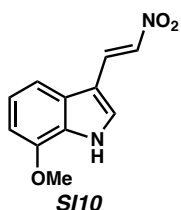

Following the second step of the general procedure for the synthesis of tryptamine derivatives, compound **SI10** was isolated as a solid in 88% yield whose NMR matched the published spectra.<sup>4</sup>

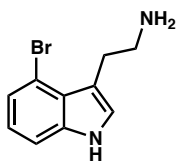

**SI11**

Following the third step of the general procedure for the synthesis of tryptamine derivatives, compound **SI11** was isolated as a brown oil in 54% yield whose NMR matched the published spectra.<sup>13</sup>

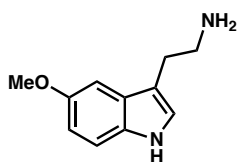

**SI12**

Following the third step of the general procedure for the synthesis of tryptamine derivatives, compound **SI12** was isolated as a brown oil in 73% yield whose NMR matched the published spectra.<sup>14</sup>

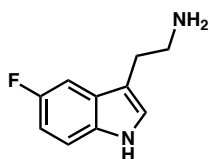

**SI13**

Following the third step of the general procedure for the synthesis of tryptamine derivatives, compound **SI13** was isolated as a brown oil in 92% yield whose NMR matched the published spectra.<sup>2</sup>

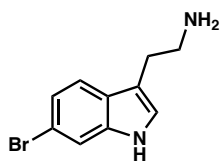

**SI14**

Following the third step of the general procedure for the synthesis of tryptamine derivatives, compound **SI14** was isolated as a brown syrup in 77% yield whose NMR matched the published spectra.<sup>3</sup>

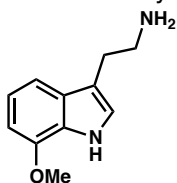

**SI15**

Following the third step of the general procedure for the synthesis of tryptamine derivatives, compound **SI15** was isolated as a brown oil in 73% yield whose NMR matched the published spectra.<sup>4</sup>

***B. General amidation and benzylation procedures for for the synthesis of substrates SI17-SI27***

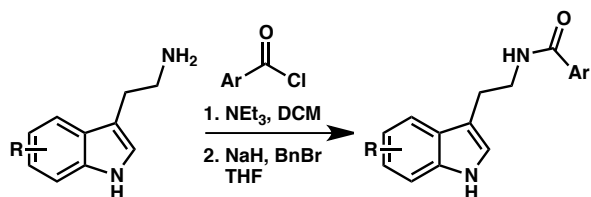

To an oven-dried 250 mL round bottom flask was added a stir-bar and the appropriate tryptamine (4.6 mmol, 1.0 equiv), Et<sub>3</sub>N (1.3 mL, 9.2 mmol, 2.0 equiv), and dry DCM (20 mL). The solution was cooled to 0 °C before the dropwise addition of the 4-*t*-butylbenzoyl chloride (0.99 mL, 5.06 mmol, 1.1 equiv). The reaction was then stirred at room temperature for 3 h when TLC showed complete consumption of starting material. The reaction was then concentrated *via* rotary evaporation and the crude material was purified by flash column chromatography in 1:1 EtOAc/hex. This material was then taken directly into the next step. The protected tryptamine (3.41 mmol, 1.0 equiv) was transferred to an oven-dried flask, dissolved in dry DMF (10 mL), and cooled to 0 °C. Sodium hydride (60 % dispersion in oil, 164 mg, 4.9 mmol, 1.2 equiv) was added slowly to the stirred solution. The reaction was then stirred at rt for 15 min before cooling back down to 0 °C, followed by dropwise addition of benzyl bromide (0.43 mL, 3.58 mmol, 1.05 equiv). The reaction was stirred cold for 5 minutes, before removal from the ice bath and stirring at rt for 16 hours. The reaction was quenched at 0 °C by the addition of aqueous ammonium chloride (10 mL) and water (10 mL). The mixture was extracted with EtOAc (3 x 25 mL) and the combined organic layers were washed with water (30 mL) and brine (30 mL), dried over magnesium sulfate, filtered, and concentrated. The crude residue was purified by flash column chromatography (1:4 to 1:1 EtOAc/hex) to afford pure product.

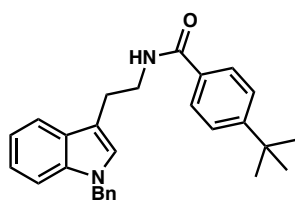

**SI17**

Following the general procedure for amidation and benzylation compound **SI17** was isolated as a white solid in 73% yield over two steps. <sup>1</sup>H NMR (500 MHz, CDCl<sub>3</sub>) δ 7.67 (d, *J* = 7.9 Hz, 1H), 7.60 (d, *J* = 8.5 Hz, 2H), 7.37 (d, *J* = 8.4 Hz, 2H), 7.32-7.20 (m, 5H), 7.15-7.09 (m, 3H), 7.00 (s, 1H), 6.29 (s, 1H), 5.27 (s, 2H), 3.79 (q, *J* = 6.3 Hz, 2H), 3.09 (t, *J* = 6.6 Hz, 2H), 1.33 (s, 9H); <sup>13</sup>C NMR (126 MHz, CDCl<sub>3</sub>) δ 167.3, 154.8, 137.7, 136.9, 131.9, 128.9, 128.0, 127.7, 126.9, 126.76, 126.3, 125.5, 122.1, 119.4, 119.1, 112.4, 109.9, 50.0, 40.2, 35.0, 31.3, 25.4 ppm; HRMS (+ESI) calcd. for [C<sub>28</sub>H<sub>31</sub>N<sub>2</sub>O] ([M+H<sup>+</sup>]): 411.2431, found: 411.2425;

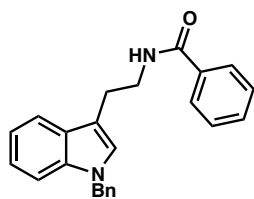

**SI18**

Following the general procedure for amidation (using benzoyl chloride) and benzylation compound **SI18** was isolated as a white solid in 70 % yield over two steps. <sup>1</sup>H NMR (500 MHz, CDCl<sub>3</sub>) δ 7.67-7.64 (m, 3H), 7.48-7.44 (m, 1H), 7.37-7.34 (m, 2H), 7.30 (d, *J* = 8.2 Hz, 1H), 7.28-7.25 (m, 3H), 7.21 (td, *J* = 7.6, 1.0 Hz, 1H), 7.15-7.09 (m, 3H), 6.99 (s, 1H), 6.30 (s, 1H), 5.27 (s, 2H), 3.79 (q, *J* = 6.3 Hz, 2H), 3.10 (t, *J* = 6.7 Hz, 2H); <sup>13</sup>C NMR (126 MHz, CDCl<sub>3</sub>) δ 167.5, 137.6, 136.9, 134.8, 131.4, 128.9, 128.6, 128.0, 127.7, 127.2, 126.9, 126.3, 122.2, 119.4, 119.1, 112.3, 109.9, 50.0, 40.3, 25.4; HRMS (+ESI) calcd. for [C<sub>24</sub>H<sub>23</sub>N<sub>2</sub>O] ([M+H<sup>+</sup>]): 355.1805, found: 355.1811.

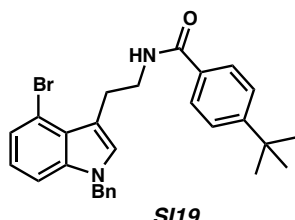

Following the general procedure for amidation (using benzoyl chloride) and benzylation compound **SI19** was isolated as a white solid in 54% yield over two steps.  $^1\text{H}$  NMR (400 MHz,  $\text{CD}_2\text{Cl}_2$ )  $\delta$  7.73-7.62 (m, 2H), 7.55-7.41 (m, 2H), 7.32 (m, 5H), 7.21-7.10 (m, 3H), 7.06 (t,  $J = 7.9$  Hz, 1H), 5.27 (s, 2H), 3.83 (dq,  $J = 21.9, 6.5$  Hz, 2H), 3.39 (t,  $J = 6.8$  Hz, 2H), 1.39 (s, 9H);  $^{13}\text{C}$  NMR (101 MHz,  $\text{CD}_2\text{Cl}_2$ )  $\delta$  167.4, 155.2, 138.6, 137.7, 132.6, 129.3, 128.2, 127.3, 127.3, 127.1, 126.5, 125.9, 124.2, 123.1, 114.8, 113.5, 109.8, 50.6, 41.7, 35.3, 31.5, 26.5; HRMS (+ESI) calcd. for  $[\text{C}_{24}\text{H}_{23}\text{N}_2\text{O}]$  ( $[\text{M}+\text{H}^+]$ ): 489.1536, found: 489.1542.

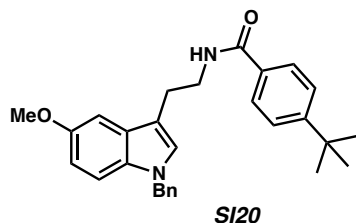

Following the general procedure for amidation (using benzoyl chloride) and benzylation, compound **SI20** was isolated as a white solid in 70% yield over two steps.  $^1\text{H}$  NMR (500 MHz,  $\text{CD}_2\text{Cl}_2$ )  $\delta$  7.66 – 7.53 (m, 2H), 7.46 – 7.35 (m, 2H), 7.34 – 7.21 (m, 3H), 7.16 (d,  $J = 8.9$  Hz, 1H), 7.14 – 7.08 (m, 2H), 7.06 (d,  $J = 2.4$  Hz, 1H), 7.03 (s, 1H), 6.80 (dd,  $J = 8.9, 2.4$  Hz, 1H), 6.27 (t,  $J = 5.6$  Hz, 1H), 5.25 (s, 2H), 3.74 (d,  $J = 14.3$  Hz, 5H), 3.03 (t,  $J = 6.7$  Hz, 2H), 1.32 (s, 9H).  $^{13}\text{C}$  NMR (126 MHz,  $\text{CD}_2\text{Cl}_2$ )  $\delta$  167.3, 155.2, 154.5, 138.5, 132.5, 129.2, 128.9, 128.0, 128.0, 127.5, 127.3, 127.0, 125.9, 112.5, 112.4, 111.1, 101.1, 56.1, 50.6, 40.6, 35.3, 31.4, 25.8; HRMS (+ESI) calcd. for  $[\text{C}_{29}\text{H}_{32}\text{N}_2\text{O}_2]$  ( $[\text{M}+\text{H}^+]$ ): 441.2537, found: 441.2540.

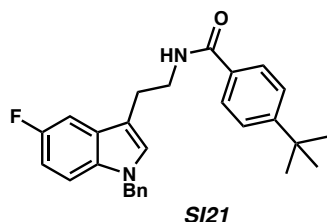

Following the general procedure for amidation and benzylation compound **SI21** was isolated as an off-white solid in 60% yield over two steps.  $^1\text{H}$  NMR (500 MHz,  $\text{CDCl}_3$ )  $\delta$  7.70 – 7.48 (m, 2H), 7.45 – 7.33 (m, 2H), 7.33 – 7.22 (m, 5H), 7.17 (dd,  $J = 9.0, 4.3$  Hz, 1H), 7.06 (dd,  $J = 6.4, 2.9$  Hz, 2H), 6.23 (t,  $J = 5.6$  Hz, 1H), 5.24 (s, 2H), 3.75 (q,  $J = 6.5$  Hz, 2H), 3.02 (t,  $J = 6.8$  Hz, 2H), 1.31 (s, 9H);  $^{13}\text{C}$  NMR (126 MHz,  $\text{CDCl}_3$ )  $\delta$  167.7, 159.0, 157.2, 155.2, 137.6, 132.1, 128.3, 127.1, 127.0, 125.8, 112.5, 112.5, 110.9, 110.9, 110.7, 104.4, 104.2, 50.6, 40.3, 35.3, 31.5, 25.7; HRMS (+ESI) calcd. for  $[\text{C}_{28}\text{H}_{30}\text{N}_2\text{OF}]$  ( $[\text{M}+\text{H}^+]$ ): 429.2337, found: 429.2338.

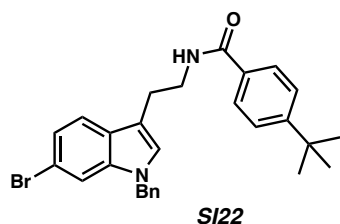

Following the general procedure for amidation and benzylation compound **SI22** was isolated as a white solid in 63% yield over two steps.  $^1\text{H}$  NMR (500 MHz,  $\text{CDCl}_3$ )  $\delta$  7.58 (d,  $J = 8.1$  Hz, 2H), 7.50 (d,  $J = 8.4$  Hz, 1H), 7.44 (d,  $J = 1.7$  Hz, 1H), 7.37 (d,  $J = 8.2$  Hz, 2H), 7.33 – 7.24 (m, 3H), 7.21 (dd,  $J = 8.5, 1.7$  Hz, 1H), 7.06 (dd,  $J = 6.6, 3.0$  Hz, 2H), 6.95 (s, 1H), 6.28 – 6.12 (m, 1H), 5.21 (s, 2H), 3.75 (q,  $J = 6.5$  Hz, 2H), 3.04 (t,  $J = 6.8$  Hz, 2H), 1.32 (s, 9H);  $^{13}\text{C}$  NMR (126 MHz,

$\text{CDCl}_3$ )  $\delta$  167.4, 154.9, 137.7, 137.1, 131.8, 129.0, 127.9, 126.9, 126.9, 126.8, 126.7, 125.6, 122.7, 120.5, 115.9, 112.9, 112.8, 50.0, 40.2, 35.0, 31.3, 25.4; HRMS (+ESI) calcd. for  $[\text{C}_{28}\text{H}_{30}\text{N}_2\text{OBr}]$  ( $[\text{M}+\text{H}^+]$ ): 489.1536, found: 489.1535.

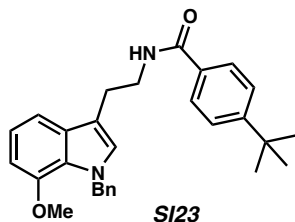

Following the general procedure for amidation and benzylation compound **SI23** was isolated as an off-white solid in 44% yield over two steps and was purified by recrystallization from hot EtOAc.  $^1\text{H}$  NMR (500 MHz,  $\text{CDCl}_3$ )  $\delta$  7.66 – 7.49 (m, 2H), 7.46 – 7.33 (m, 2H), 7.33 – 7.20 (m, 4H), 7.12 (dd,  $J = 7.2, 2.2$  Hz, 2H), 7.06 (t,  $J = 7.8$  Hz, 1H), 6.92 (s, 1H), 6.69 (d,  $J = 7.7$  Hz, 1H), 6.21 (t,  $J = 5.3$  Hz, 1H), 5.62 (s, 2H), 3.88 (s, 3H), 3.78 (q,  $J = 6.3$  Hz, 2H), 3.06 (t,  $J = 6.6$  Hz, 2H), 1.35 (s, 9H);  $^{13}\text{C}$  NMR (126 MHz,  $\text{CDCl}_3$ )  $\delta$  167.3, 154.7, 147.8, 139.8, 131.9, 130.2, 128.6, 127.3, 127.2, 126.8, 126.7, 126.6, 125.5, 119.9, 112.6, 111.9, 103.2, 55.5, 52.4, 40.0, 35.0, 31.3, 25.4; HRMS (+ESI) calcd. for  $[\text{C}_{29}\text{H}_{32}\text{N}_2\text{O}_2]$  ( $[\text{M}+\text{H}^+]$ ): 441.2537, found: 441.2541.

### C. Synthesis of substrate **SI24**

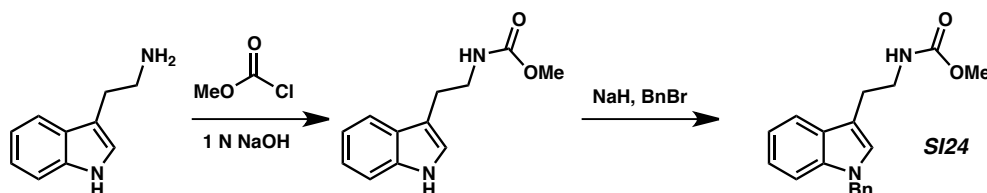

Moc-tryptamine was prepared in 90% yield following the procedure described by Skylar and Heathcock.<sup>5</sup> This carbamate was subsequently subjected to the general benzylation conditions and purified by flash chromatography (1:2 ethyl acetate/hexanes) to afford **SI24** as a colorless syrup (83% yield).  $^1\text{H}$  NMR (500 MHz,  $\text{CDCl}_3$ )  $\delta$  7.63 (d,  $J = 7.9$  Hz, 1H), 7.34 – 7.27 (m, 4H), 7.20 (ddd,  $J = 8.2, 7.0, 1.2$  Hz, 1H), 7.17 – 7.08 (m, 3H), 6.97 (s, 1H), 5.29 (s, 2H), 4.79 (s, 1H), 3.67 (s, 3H), 3.53 (q,  $J = 6.6$  Hz, 2H), 2.99 (t,  $J = 6.9$  Hz, 2H);  $^{13}\text{C}$  NMR (126 MHz,  $\text{CDCl}_3$ )  $\delta$  164.6, 157.1, 137.6, 128.9, 127.7, 126.3, 119.3, 112.2, 109.9, 77.4, 77.4, 77.2, 76.9, 52.1, 50.0, 41.5, 25.9; HRMS (+ESI) calcd. for  $[\text{C}_{19}\text{H}_{20}\text{N}_2\text{O}_2]$  ( $[\text{M}+\text{H}^+]$ ): 309.1958, found: 309.1961.

### D. Synthesis of substrate **SI26**

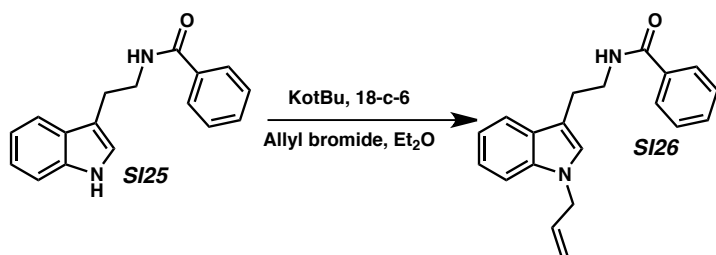

Tryptamine **SI25** (1.0 g, 3.8 mmol) was added to a mixture of 18-crown-6 (0.1 mg, 0.38 mmol), KOtBu (508 mg, 4.5 mmol) in  $\text{Et}_2\text{O}$  (7.5 mL). The reaction mixture was cooled to 0 °C, at which time the allyl bromide (400  $\mu\text{L}$ , 4.5 mmol) was added dropwise. The reaction was stirred at room temperature for 3 h, quenched with water, extracted in  $\text{Et}_2\text{O}$  and flashed in 1:1 EtOAc/hex to yield an orange powder.  $^1\text{H}$  NMR (400 MHz,  $\text{CD}_2\text{Cl}_2$ )  $\delta$  7.77 – 7.67 (m, 2H), 7.65 (dt,  $J = 8.0, 1.0$  Hz, 1H), 7.54 – 7.45 (m, 1H), 7.40 (tt,  $J = 6.6, 1.6$  Hz, 2H), 7.36 – 7.28 (m, 1H), 7.21 (ddd,  $J = 8.3, 6.9, 1.3$  Hz, 1H), 7.10 (ddd,  $J = 8.0, 6.9, 1.1$  Hz, 1H), 7.00 (s, 1H), 6.46 (s, 1H), 6.00 (ddt,  $J = 17.1, 10.5, 5.4$  Hz, 1H), 5.18 (dq,  $J = 10.2, 1.5$  Hz, 1H), 5.06 (dq,  $J = 17.1, 1.6$  Hz, 1H), 4.70 (dt,  $J = 5.4, 1.7$  Hz, 2H), 3.75 (td,  $J = 6.9, 5.6$  Hz, 2H), 3.08 (t,  $J = 6.9$  Hz, 2H);  $^{13}\text{C}$  NMR (101 MHz,  $\text{CD}_2\text{Cl}_2$ )  $\delta$  167.5, 137.1, 135.5, 134.3, 131.7, 128.9, 128.5, 127.3, 126.4, 122.2, 119.5, 119.4, 117.3, 112.5, 110.2, 49.1, 40.9, 25.8; HRMS (+ESI) calcd. for  $[\text{C}_{20}\text{H}_{20}\text{N}_2\text{O}]$  ( $[\text{M}+\text{H}^+]$ ): 305.1648, found: 305.1653.

### E. Synthesis of substrate **SI27**

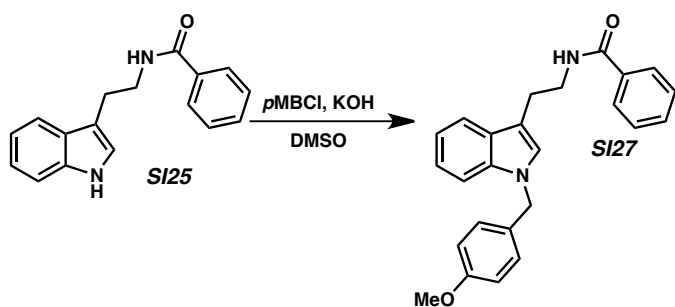

Tryptamine **SI25** (1.0 g, 3.8 mmol) and KOH (420 mg, 7.54 mmol) were stirred in DMSO (15 mL) for 1 hour. To the reaction mixture, *p*MBCl (1 mL, 7.54 mmol) was added dropwise. The reaction was stirred at rt overnight, quenched with water, extracted in EtOAc and flashed in 1:1 EtOAc/hex to yield an orange powder. <sup>1</sup>H NMR (400 MHz, CD<sub>2</sub>Cl<sub>2</sub>) δ 7.77 – 7.57 (m, 3H), 7.55 – 7.44 (m, 1H), 7.44 – 7.35 (m, 2H), 7.35 – 7.27 (m, 1H), 7.19 (ddd, *J* = 8.3, 6.9, 1.3 Hz, 1H), 7.15 – 7.05 (m, 3H), 7.03 (s, 1H), 6.85 – 6.73 (m, 2H), 6.45 (s, 1H), 5.20 (s, 2H), 3.75 (d, *J* = 2.8 Hz, 5H), 3.08 (t, *J* = 6.8 Hz, 2H); <sup>13</sup>C NMR (101 MHz, CD<sub>2</sub>Cl<sub>2</sub>) δ 167.5, 159.6, 137.2, 135.4, 131.7, 130.3, 128.9, 128.8, 128.7, 127.3, 126.7, 122.3, 119.5, 119.5, 114.5, 112.6, 110.3, 55.7, 49.9, 40.8, 25.8. HRMS (+ESI) calcd. for [C<sub>25</sub>H<sub>24</sub>N<sub>2</sub>O<sub>2</sub>] ([M+H]<sup>+</sup>): 385.1911, found: 385.1897.

### F. Synthesis of aryldiazonium salts

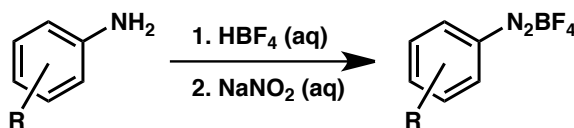

The aniline (10mmol) was dissolved in a mixture of 50% (V/V) fluoroboric acid (3.5 mL) and water (4.0 mL). After cooling to 0° C, an aqueous solution of sodium nitrite (700 mg, 10.1 mmol, in 1.5 mL H<sub>2</sub>O) was added in 0.25 mL portions. The mixture was stirred for 30 min and the thick precipitate was collected and dissolved in acetone. The diazonium tetrafluoroborate was then precipitated by the addition of Et<sub>2</sub>O. The product was dried under high vacuum for several hours. Utilization of this procedure provided diazonium salts and yields comparable to those previously reported, and all spectral data that matched the data found in the literature; see the below references.

1. 4-Bromobenzenediazonium tetrafluoroborate, 4-fluorobenzenediazonium tetrafluoroborate, 4-*tert*-butylbenzenediazonium tetrafluoroborate, and 4-methoxycarbonylbenzenediazonium tetrafluoroborate.<sup>6</sup>
2. Benzenediazonium tetrafluoroborate, 4-methylcarbonylbenzenediazonium tetrafluoroborate, 4-methoxybenzenediazonium tetrafluoroborate, naphthalen-1-yl-diazonium tetrafluoroborate.<sup>7</sup>
3. 2-Chlorobenzenediazonium tetrafluoroborate.<sup>8</sup>
4. 2-Methylbenzenediazonium tetrafluoroborate, 3-methylbenzenediazonium tetrafluoroborate.<sup>9</sup>
5. 4-Trifluoromethylbenzenediazonium tetrafluoroborate.<sup>10</sup>
6. 3-Fluorobenzenediazonium tetrafluoroborate.<sup>11</sup>
7. 3-Bromo-4-methylbenzenediazonium tetrafluoroborate.<sup>12</sup>

### G. General procedure for the phase-transfer diazenation reaction

A suspension of the tryptamine (0.05 mmol), Na<sub>3</sub>PO<sub>4</sub> (24 mg, 0.15 mmol, 3 equiv), and (*R*)-STRIP (1.8 mg, 0.0025 mmol, 5 mol%) in MTBE (0.5 mL) was stirred vigorously at rt for 15 minutes. To this suspension the aryldiazonium



salt (0.05 mmol, 1 equiv) was added rapidly in one portion. The reactions were stirred until TLC analysis indicated completion (1-12 h). The bright yellow reaction mixtures were filtered through cotton wool and the volatiles were removed by rotary evaporation. The crude product was dissolved in benzene and loaded onto a 1 cm column and eluted in 5:95 EtOAc:hex to yield yellow foams. The products were stable for several months at -20 °C neat, in protic solvents, or in pyridine. However, decomposition of some of the products occurred in halogenated solvents or aprotic polar solvents.

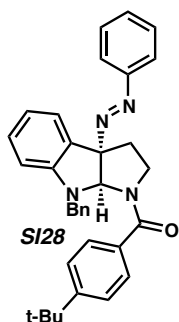

Following the general procedure for the diazination, compound **SI28** was isolated in 99% yield.  $^1\text{H}$  NMR (500 MHz;  $\text{CD}_2\text{Cl}_2$ )  $\delta$  7.69 (dd,  $J$  = 7.5, 1.8 Hz, 2H), 7.45 (d,  $J$  = 5.9 Hz, 3H), 7.37 (t,  $J$  = 9.4 Hz, 4H), 7.31 (d,  $J$  = 8.3 Hz, 2H), 7.27 (t,  $J$  = 7.3 Hz, 2H), 7.21 (t,  $J$  = 7.0 Hz, 2H), 7.10 (t,  $J$  = 7.5 Hz, 1H), 6.81 (s, 1H), 6.67 (t,  $J$  = 7.2 Hz, 1H), 6.37 (d,  $J$  = 7.8 Hz, 1H), 4.83 (s, 2H), 3.79 (t,  $J$  = 8.9 Hz, 1H), 3.58 (td,  $J$  = 11.5, 5.5 Hz, 1H), 2.59-2.47 (m, 2H), 1.30 (s, 9H);  $^{13}\text{C}$  NMR (126 MHz,  $\text{CD}_2\text{Cl}_2$ )  $\delta$  170.1, 153.8, 151.8, 151.5, 139.5, 133.0, 131.1, 130.2, 129.1, 128.4, 127.5, 127.3, 127.0, 126.8, 125.12, 125.1, 122.5, 117.5, 106.3, 88.7, 80.9, 49.9, 48.7, 36.6, 34.8, 31.0 ppm; HRMS (+ESI) calcd. for  $[\text{C}_{34}\text{H}_{35}\text{N}_4\text{O}]$  ( $[\text{M}+\text{H}^+]$ ): 515.2805, found: 515.2797; HPLC (ChiralPak IB column) 98:02 (hex/*i*PrOH) 1mL/min;  $t_{\text{major}}$  (21.2 min),  $t_{\text{minor}}$  (26.7 min); 91% *ee*.

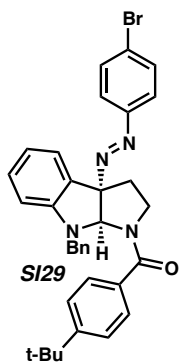

Following the general procedure for the diazination, compound **SI29** was isolated in 82% yield.  $^1\text{H}$  NMR (500 MHz;  $\text{CD}_2\text{Cl}_2$ )  $\delta$  7.63-7.59 (m, 4H), 7.42-7.33 (m, 6H), 7.29 (t,  $J$  = 7.4 Hz, 2H), 7.23 (d,  $J$  = 7.2 Hz, 2H), 7.15-7.12 (m, 1H), 6.82 (s, 1H), 6.71 (d,  $J$  = 7.2 Hz, 1H), 6.41 (d,  $J$  = 7.9 Hz, 1H), 4.85 (s, 2H), 3.82 (dd,  $J$  = 10.6, 8.3 Hz, 1H), 3.61 (td,  $J$  = 11.5, 5.2 Hz, 1H), 2.60 (dd,  $J$  = 12.4, 5.1 Hz, 1H), 2.51 (td,  $J$  = 12.2, 7.8 Hz, 1H), 1.32 (s, 9H);  $^{13}\text{C}$  NMR (126 MHz,  $\text{CD}_2\text{Cl}_2$ )  $\delta$  170.1, 153.8, 151.5, 150.5, 139.4, 132.9, 132.3, 130.3, 128.4, 127.3, 127.0, 126.8, 126.5, 125.4, 125.2, 125.1, 124.2, 117.5, 106.4, 88.8, 80.7, 49.8, 48.7, 36.6, 34.8, 31.0 ppm; HRMS (+ESI) calcd. for  $[\text{C}_{34}\text{H}_{34}\text{N}_4\text{OBr}]$  ( $[\text{M}+\text{H}^+]$ ): 593.1910, found: 593.1903; HPLC (ChiralPak IB column) 98:02 (hex/*i*PrOH) 1mL/min;  $t_{\text{major}}$  (12.1 min),  $t_{\text{minor}}$  (14.5 min); 88% *ee*.

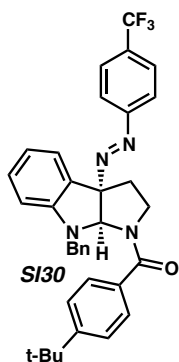

Following the general procedure for the diazenation, compound **SI30** was isolated in 88% yield.  $^1\text{H}$  NMR (400 MHz; pyridine- $d_5$ )  $\delta$  10.18 (s, 1H), 9.24 (s, 4H), 9.05-9.03 (m, 2H), 8.94 (t,  $J$  = 8.9 Hz, 3H), 8.80-8.66 (m, 6H), 8.34 (t,  $J$  = 7.3 Hz, 1H), 8.07 (d,  $J$  = 7.9 Hz, 1H), 6.55 (s, 2H), 5.30 (t,  $J$  = 8.9 Hz, 1H), 5.10 (td,  $J$  = 11.0, 4.7 Hz, 1H), 4.14 (dd,  $J$  = 12.3, 5.2 Hz, 1H), 4.02 (td,  $J$  = 12.0, 8.0 Hz, 1H), 2.73 (s, 9H);  $^{13}\text{C}$  NMR (126 MHz, pyridine- $d_5$ )  $\delta$  171.2, 154.8, 152.8, 151.2, 140.7, 136.7, 134.6, 133.0 (q,  $J$  = 32.1 Hz), 131.9, 129.8, 129.1, 128.5, 128.2, 127.8, 127.6, 126.6, 126.5, 124.7, 119.2, 108.2, 90.7, 81.9, 51.1, 49.8, 37.6, 35.8, 32.1;  $^{19}\text{F}$  NMR (376 MHz, pyridine- $d_5$ )  $\delta$  -59.7 ppm; HRMS (+ESI) calcd. for  $[\text{C}_{35}\text{H}_{34}\text{N}_4\text{OF}_3]$  ( $[\text{M}+\text{H}^+]$ ): 583.2679, found: 583.2668; HPLC (ChiralPak IB column) 98:02 (hex/*i*PrOH) 1 mL/min;  $t_{\text{major}}$  (10.2 min),  $t_{\text{minor}}$  (13.3 min); 89% *ee*.

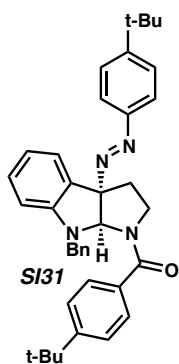

Following the general procedure for the diazenation, compound **SI31** was isolated in 53% yield.  $^1\text{H}$  NMR (500 MHz;  $\text{C}_6\text{D}_6$ )  $\delta$  7.96 (d,  $J$  = 8.3 Hz, 2H), 7.66 (d,  $J$  = 6.9 Hz, 2H), 7.60 (d,  $J$  = 7.5 Hz, 2H), 7.53 (d,  $J$  = 6.2 Hz, 2H), 7.44 (d,  $J$  = 8.4 Hz, 2H), 7.38-7.32 (m, 4H), 7.25 (t,  $J$  = 7.3 Hz, 2H), 6.92 (t,  $J$  = 7.4 Hz, 1H), 6.57 (d,  $J$  = 7.7 Hz, 1H), 5.16 (q,  $J$  = 21.3 Hz, 2H), 3.62-3.59 (m, 1H), 3.47-3.42 (m, 1H), 2.54-2.51 (m, 1H), 2.41 (q,  $J$  = 10.2 Hz, 1H), 1.36 (s, 9H), 1.35 (s, 9H);  $^{13}\text{C}$  NMR (126 MHz,  $\text{CD}_2\text{Cl}_2$ )  $\delta$  170.0, 154.7, 153.7, 151.4, 149.6, 139.5, 133.0, 130.1, 128.3, 127.3, 127.0, 126.9, 126.7, 126.0, 125.1, 125.0, 122.2, 117.4, 106.2, 88.4, 80.9, 49.8, 48.7, 36.6, 34.9, 34.8, 31.0, 31.0; HRMS (+ESI) calcd. for  $[\text{C}_{38}\text{H}_{43}\text{N}_4\text{O}]$  ( $[\text{M}+\text{H}^+]$ ): 571.3437, found: 571.3448; HPLC (ChiralPak IB column) 99:01 (hex/*i*PrOH) 1 mL/min;  $t_{\text{major}}$  (13.6 min),  $t_{\text{minor}}$  (23.0 min); 93% *ee*.

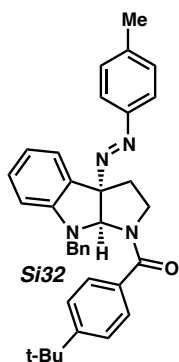

Following the general procedure for the diazenation, compound **SI32** was isolated in 66% yield.  $^1\text{H}$  NMR (300 MHz;  $\text{CD}_2\text{Cl}_2$ )  $\delta$  7.63 (d,  $J$  = 8.4 Hz, 2H), 7.43-7.23 (m, 11H), 7.12 (t,  $J$  = 7.3 Hz, 2H), 6.83 (s, 1H), 6.70 (t,  $J$  = 7.3 Hz, 1H), 6.39 (d,  $J$  = 7.8 Hz, 1H), 4.86 (s, 2H), 3.85-3.77 (m, 1H), 3.66-3.59 (m, 1H), 2.58-2.51 (m, 2H), 2.41 (s, 3H), 1.33 (s, 9H);  $^{13}\text{C}$  NMR (126 MHz,  $\text{CD}_2\text{Cl}_2$ )  $\delta$  170.0, 164.6, 153.7, 151.4, 149.8, 141.7, 139.4, 133.0, 130.1, 129.6, 128.3, 127.3, 127.0, 126.9, 126.7, 125.0, 122.5, 117.4, 106.2, 88.3, 80.9, 49.8, 48.7, 36.6, 34.7, 30.9, 21.2 ppm; HRMS (+ESI) calcd. for

[C<sub>35</sub>H<sub>37</sub>N<sub>4</sub>O] ([M+H<sup>+</sup>]): 529.2962, found: 529.2980; HPLC (ChiralPak IB column) 98:02 (hex/*i*PrOH) 1mL/min; *t*<sub>major</sub> (11.7 min), *t*<sub>minor</sub> (14.5 min); 90% *ee*.

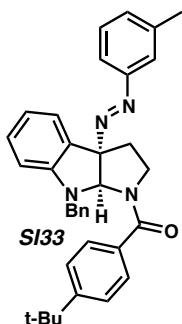

Following the general procedure for the diazotation, compound **SI33** was isolated in 91% yield. <sup>1</sup>H NMR (500 MHz; CD<sub>2</sub>Cl<sub>2</sub>) δ 7.51-7.50 (m, 2H), 7.40-7.32 (m, 7H), 7.28 (t, *J* = 7.4 Hz, 3H), 7.22 (d, *J* = 7.4 Hz, 2H), 7.12 (t, *J* = 7.8 Hz, 1H), 6.81 (s, 1H), 6.69 (t, *J* = 7.4 Hz, 1H), 6.39 (d, *J* = 7.9 Hz, 1H), 4.84 (s, 2H), 3.81 (dd, *J* = 10.5, 7.9 Hz, 1H), 3.60 (td, *J* = 11.4, 5.5 Hz, 1H), 2.60-2.49 (m, 2H), 2.41 (s, 3H), 1.31 (s, 9H); <sup>13</sup>C NMR (126 MHz, CD<sub>2</sub>Cl<sub>2</sub>) δ 170.5, 154.2, 152.3, 151.9, 139.9, 139.7, 133.5, 132.3, 130.7, 129.3, 128.9, 127.8, 127.4, 127.2, 125.6, 125.6, 123.2, 120.5, 117.9, 106.8, 89.1, 81.4, 50.3, 49.2, 37.0, 35.3, 31.5, 21.6 ppm; HRMS (+ESI) calcd. for [C<sub>35</sub>H<sub>37</sub>N<sub>4</sub>O] ([M+H<sup>+</sup>]): 529.2967, found: 529.2979; HPLC (ChiralPak IB column) 98:02 (hex/*i*PrOH) 1mL/min; *t*<sub>major</sub> (11.0 min), *t*<sub>minor</sub> (14.1 min); 93% *ee*.

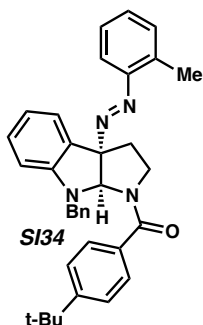

Following the general procedure for the diazotation, compound **SI34** was isolated in 87% yield. <sup>1</sup>H NMR (500 MHz; CD<sub>2</sub>Cl<sub>2</sub>) δ; 7.41-7.28 (m, 11H), 7.22-7.19 (m, 2H), 7.12 (t, *J* = 7.8 Hz, 2H), 6.84 (s, 1H), 6.70 (t, *J* = 7.5 Hz, 1H), 6.39 (d, *J* = 8.0 Hz, 1H), 4.88-4.81 (m, 2H), 3.82 (dd, *J* = 9.9, 7.9 Hz, 1H), 3.62 (td, *J* = 11.3, 5.8 Hz, 1H), 2.57-2.49 (m, 5H), 1.32 (s, 9H); <sup>13</sup>C NMR (126 MHz, CD<sub>2</sub>Cl<sub>2</sub>) δ 170.6, 154.2, 151.9, 150.3, 140.0, 137.9, 131.6, 131.4, 130.6, 128.9, 127.8, 127.7, 127.4, 127.3, 127.2, 126.8, 125.6, 118.3, 116.1, 107.0, 89.8, 82.0, 50.4, 48.7, 37.1, 35.3, 31.4, 30.1, 18.0 ppm; HRMS (+ESI) calcd. for [C<sub>35</sub>H<sub>37</sub>N<sub>4</sub>O] ([M+H<sup>+</sup>]): 529.2962, found: 529.2980; HPLC (ChiralPak IB column) 98:02 (hex/*i*PrOH) 1mL/min; *t*<sub>major</sub> (21.2 min), *t*<sub>minor</sub> (26.7 min); 91% *ee*.

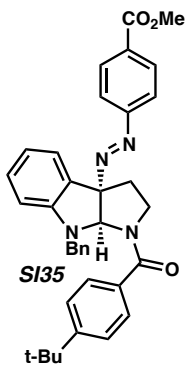

Following the general procedure for the diazotation, compound **SI35** was isolated in 77% yield. <sup>1</sup>H NMR (500 MHz; CD<sub>2</sub>Cl<sub>2</sub>) δ 8.16 (d, *J* = 7.8 Hz, 2H), 7.78 (d, *J* = 7.8 Hz, 2H), 7.45-7.26 (m, 10H), 7.17 (q, *J* = 6.5 Hz, 1H), 6.87 (s, 1H), 6.74 (t, *J* = 5.0 Hz, 1H), 6.45 (d, *J* = 7.8 Hz, 1H), 4.88 (s, 2H), 3.96 (s, 3H), 3.87 (t, *J* = 7.8 Hz, 1H), 3.68-3.63 (m, 1H), 2.67-2.53 (m, 2H), 1.35 (s, 9H); <sup>13</sup>C NMR (126 MHz, CD<sub>2</sub>Cl<sub>2</sub>) δ 170.0, 166.2, 164.6, 154.2, 153.7, 151.4, 139.3, 132.8, 132.1, 130.4, 130.3, 128.3, 127.3, 126.9, 126.8, 125.1, 122.4, 117.5, 106.4, 89.2, 80.6, 52.2, 49.8, 48.6, 36.5, 34.8, 30.9; HRMS

(+ESI) calcd. for  $[C_{36}H_{37}N_4O_3]$  ( $[M+H]^+$ ): 573.2866, found: 573.2870; HPLC (ChiralPak IB column) 98:02 (hex/*i*PrOH) 1mL/min;  $t_{major}$  (23.8 min),  $t_{minor}$  (27.3 min); 87% *ee*.

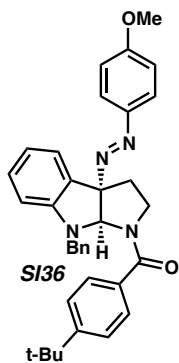

Following the general procedure for the diazotation, compound **SI36** was isolated in 63% yield.  $^1H$  NMR (500 MHz;  $CD_2Cl_2$ )  $\delta$  7.72 (d,  $J = 8.9$  Hz, 2H), 7.41-7.37 (m, 3H), 7.34-7.28 (m, 3H), 7.23 (d,  $J = 7.0$  Hz, 4H), 7.11 (t,  $J = 7.7$  Hz, 1H), 6.97 (d,  $J = 8.7$  Hz, 2H), 6.80 (s, 1H), 6.69 (t,  $J = 7.3$  Hz, 1H), 6.38 (d,  $J = 7.8$  Hz, 1H), 4.85 (s, 2H), 3.86 (s, 3H), 3.82-3.79 (m, 1H), 3.60 (td,  $J = 11.4, 5.4$  Hz, 1H), 2.59-2.48 (m, 2H), 1.32 (s, 9H);  $^{13}C$  NMR (126 MHz,  $CD_2Cl_2$ )  $\delta$  170.5, 162.6, 154.2, 151.9, 146.4, 140.0, 133.5, 130.5, 128.8, 127.8, 127.4, 127.2, 125.6, 125.5, 124.9, 117.9, 114.5, 106.7, 88.5, 81.5, 56.1, 50.3, 49.2, 37.2, 35.3, 31.5, 30.3 ppm; HRMS (+ESI) calcd. for  $[C_{35}H_{37}N_4O_2]$  ( $[M+H]^+$ ): 545.2911, found: 545.2928; HPLC (ChiralPak IB column) 97:03 (hex/*i*PrOH) 1mL/min;  $t_{major}$  (18.3 min),  $t_{minor}$  (16.9 min); 94% *ee*.

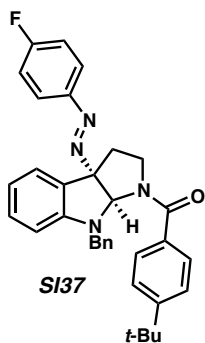

Following the general procedure for the diazotation, compound **SI37** was isolated in 79% yield.  $^1H$  NMR (500 MHz;  $CD_2Cl_2$ )  $\delta$  7.83-7.75 (m, 2H), 7.48-7.12 (m, 13H), 6.86 (s, 1H), 6.74 (t,  $J = 7.4$  Hz, 1H), 6.45 (d,  $J = 8.0$  Hz, 1H), 4.89 (s, 2H), 3.86 (dd,  $J = 11.1, 7.7$  Hz, 1H), 3.65 (td,  $J = 11.6, 5.5$  Hz, 1H), 2.60 (ddd,  $J = 36.1, 12.4, 6.6$  Hz, 2H), 1.37 (s, 9H);  $^{13}C$  NMR (126 MHz,  $CD_2Cl_2$ )  $\delta$  170.5, 165.9, 163.9, 154.2, 151.9, 148.8, 139.9, 133.4, 130.7, 128.9, 127.8, 127.4, 127.3, 125.5, 125.2, 125.1, 118.0, 116.4, 106.8, 89.0, 81.3, 50.3, 49.2, 37.1, 35.3, 31.5; HRMS (+ESI) calcd. for  $[C_{34}H_{33}FN_4O]$  ( $[M+H]^+$ ): 533.2711, found: 533.2714; HPLC (ChiralPak IB column) 99:01 (hex/*i*PrOH) 1mL/min;  $t_{major}$  (16.6 min),  $t_{minor}$  (25.9 min); 93% *ee*.

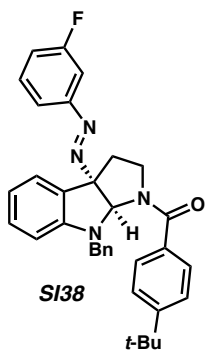

Following the general procedure for the diazotation, compound **SI38** was isolated in 95% yield.  $^1H$  NMR (500 MHz;  $CD_2Cl_2$ )  $\delta$  7.59 (dt,  $J = 8.0, 1.3$  Hz, 1H), 7.52-7.11 (m, 14H), 6.84 (s, 1H), 6.71 (t,  $J = 7.4$  Hz, 1H), 6.42 (d,  $J = 7.9$  Hz, 1H), 4.86 (s, 2H), 3.83 (dd,  $J = 11.2, 7.5$  Hz, 1H), 3.62 (td,  $J = 11.6, 5.4$  Hz, 1H), 2.62 (dd,  $J = 12.5, 5.4$  Hz, 1H), 2.52 (td,  $J =$

12.3, 7.7 Hz, 1H), 1.33 (s, 9H);  $^{13}\text{C}$  NMR (126 MHz,  $\text{CD}_2\text{Cl}_2$ )  $\delta$  170.5, 164.6, 162.7, 154.3, 153.7, 153.7, 151.9, 139.8, 133.4, 130.9, 128.9, 127.8, 127.5, 127.3, 127.0, 125.6, 120.7, 118.4, 118.2, 108.5, 106.9, 89.3, 81.1, 50.3, 49.1, 37.0, 35.3, 31.5; HRMS (+ESI) calcd. for  $[\text{C}_{34}\text{H}_{33}\text{FN}_4\text{O}]$  ( $[\text{M}+\text{H}^+]$ ): 533.2711, found: 533.2713; HPLC (ChiralPak IB column) 99:01 (hex/*i*PrOH) 1 mL/min;  $t_{\text{major}}$  (16.7 min),  $t_{\text{minor}}$  (23.1 min); 91% *ee*.

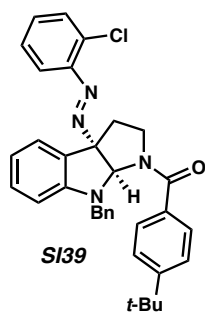

Following the general procedure for the diazotation, compound **SI39** was isolated in 87% yield.  $^1\text{H}$  NMR (500 MHz;  $\text{CD}_2\text{Cl}_2$ )  $\delta$  7.53 (d,  $J = 8.0$  Hz, 1H), 7.43–7.13 (m, 13H), 6.88 (s, 1H), 6.70 (t,  $J = 7.4$  Hz, 1H), 6.40 (d,  $J = 7.9$  Hz, 1H), 5.32 (s, 1H), 4.85 (s, 2H), 3.87–3.79 (m, 1H), 3.63 (td,  $J = 11.2, 6.0$  Hz, 1H), 2.61–2.51 (m, 2H), 1.32 (s, 9H);  $^{13}\text{C}$  NMR (126 MHz,  $\text{CDCl}_3$ )  $\delta$  170.8, 165.3, 154.5, 152.2, 140.1, 134.9, 133.6, 132.5, 131.2, 129.1, 128.1, 128.0, 127.6, 127.5, 127.4, 126.9, 126.0, 125.9, 118.6, 118.3, 107.1, 90.2, 82.1, 50.6, 49.5, 37.3, 35.5, 31.7; HRMS (+ESI) calcd. For  $[\text{C}_{34}\text{H}_{33}\text{FN}_4\text{O}]$  ( $[\text{M}+\text{H}^+]$ ): 549.2416, found: 549.2421; HPLC (ChiralPak IB column) 99:01 (hex/*i*PrOH) 1 mL/min;  $t_{\text{major}}$  (22.3 min),  $t_{\text{minor}}$  (52.3 min); 91% *ee*.

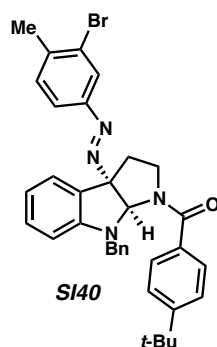

Following the general procedure for the diazotation, compound **SI40** was isolated in 93% yield.  $^1\text{H}$  NMR (500 MHz;  $\text{CD}_2\text{Cl}_2$ )  $\delta$  7.88 (d,  $J = 2.1$  Hz, 1H), 7.61 (dd,  $J = 8.1, 1.9$  Hz, 1H), 7.43–7.08 (m, 12H), 6.79 (s, 1H), 6.70 (t,  $J = 7.4$  Hz, 1H), 6.41 (d,  $J = 8.0$  Hz, 1H), 4.84 (s, 2H), 3.82 (dd,  $J = 11.1, 7.6$  Hz, 1H), 3.60 (td,  $J = 11.5, 5.4$  Hz, 1H), 2.55 (ddd,  $J = 36.2, 12.4, 6.6$  Hz, 2H), 2.45 (s, 3H), 1.32 (s, 9H);  $^{13}\text{C}$  NMR (126 MHz,  $\text{CDCl}_3$ )  $\delta$  170.5, 154.2, 151.9, 151.1, 141.6, 139.9, 133.4, 131.6, 130.7, 128.8, 127.8, 127.5, 127.1, 125.9, 125.7, 125.6, 125.6, 123.0, 118.0, 106.9, 100.5, 89.1, 81.2, 50.3, 49.2, 37.0, 35.3, 31.5, 23.2; HRMS (+ESI) calcd. for  $[\text{C}_{30}\text{H}_{27}\text{N}_4\text{O}]$  ( $[\text{M}+\text{H}^+]$ ): 607.2067, found: 607.2071; HPLC (ChiralPak IB column) 99:01 (hex/*i*PrOH) 1 mL/min;  $t_{\text{major}}$  (17.8 min),  $t_{\text{minor}}$  (27.8 min); 90% *ee*.

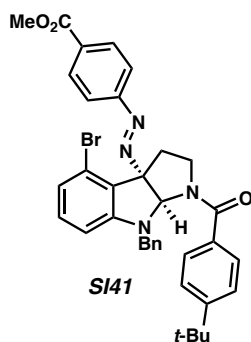

Following the general procedure for the diazotation, compound **SI41** was isolated in 39% yield.  $^1\text{H}$  NMR (500 MHz;  $\text{CD}_2\text{Cl}_2$ )  $\delta$  8.13 (d,  $J = 8.4$  Hz, 2H), 7.72 (d,  $J = 8.5$  Hz, 2H), 7.50–7.09 (m, 9H), 7.01 (t,  $J = 8.1$  Hz, 1H), 6.82 (d,  $J = 7.9$  Hz, 1H), 6.48 (s, 1H), 6.38 (d,  $J = 8.1$  Hz, 1H), 4.81 (s, 2H), 3.91 (app. s, 4H), 3.69 (m, 1H), 3.09 (dd,  $J = 13.0, 5.2$  Hz, 1H),

2.91(td,  $J = 12.7, 8.4$  Hz, 1H), 1.31 (s, 9H);  $^{13}\text{C}$  NMR (126 MHz,  $\text{CD}_2\text{Cl}_2$ )  $\delta$  170.2, 166.5, 154.6, 154.2, 153.8, 138.9, 132.9, 132.5, 132.0, 130.8, 130.7, 128.7, 127.6, 127.1, 125.8, 125.5, 122.7, 121.6, 105.7, 90.1, 81.5, 52.6, 49.9, 49.3, 35.1, 34.7, 31.2, 30.0; HRMS (+ESI) calcd. for  $[\text{C}_{36}\text{H}_{35}\text{N}_4\text{O}_3\text{Br}]$  ( $[\text{M}+\text{H}^+]$ ): 651.1971, found: 651.1974; HPLC (ChiralPak IB column) 99:01 (hex/*i*PrOH) 1mL/min;  $t_{\text{major}}$  (23.3 min),  $t_{\text{minor}}$  (27.9 min); 89% *ee*.

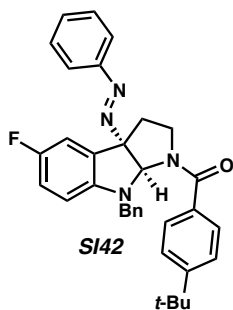

Following the general procedure for the diazation, compound **SI42** was isolated in 80% yield.  $^1\text{H}$  NMR (500 MHz,  $\text{CD}_2\text{Cl}_2$ )  $\delta$  7.72 (dd,  $J = 6.5, 3.0$  Hz, 2H), 7.52 – 7.08 (m, 12H), 7.01 (d,  $J = 7.9$  Hz, 1H), 6.90 – 6.72 (m, 2H), 6.28 (dd,  $J = 8.7, 4.0$  Hz, 1H), 4.82 (s, 2H), 3.84 (t,  $J = 9.7$  Hz, 1H), 3.63 (dt,  $J = 17.5, 7.8$  Hz, 1H), 2.54 (dt,  $J = 13.1, 5.6$  Hz, 2H), 1.32 (d,  $J = 2.7$  Hz, 9H);  $^{13}\text{C}$  NMR (126 MHz,  $\text{CDCl}_3$ )  $\delta$  170.5, 165.1, 152.1, 148.3, 139.7, 131.7, 129.6, 128.7, 127.5, 127.3, 126.7, 125.7, 123.1, 117.2, 116.7, 116.5, 113.1, 112.9, 107.1, 88.7, 82.1, 51.0, 49.2, 37.2, 35.3, 31.5; HRMS (+ESI) calcd. for  $[\text{C}_{34}\text{H}_{33}\text{FN}_4\text{O}]$  ( $[\text{M}+\text{H}^+]$ ): 533.2711, found: 533.2716; HPLC (ChiralPak IB column) 99:01 (hex/*i*PrOH) 1mL/min;  $t_{\text{major}}$  (46.4 min),  $t_{\text{minor}}$  (56.0 min); 86% *ee*.

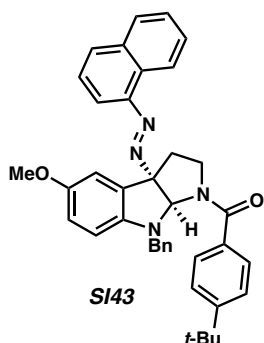

Following the general procedure for the diazation, compound **SI43** was isolated in 67% yield.  $^1\text{H}$  NMR (500 MHz, Pyridine- $d_5$ )  $\delta$  8.92 (d,  $J = 7.9$  Hz, 1H), 8.00 (dd,  $J = 23.6, 8.0$  Hz, 3H), 7.73 (m, 5H), 7.56 – 7.47 (m, 4H), 7.42 (s, 1H), 7.37 (s, 1H), 7.31 (q,  $J = 6.7, 5.9$  Hz, 3H), 6.94 (d,  $J = 8.8$  Hz, 1H), 6.58 (d,  $J = 8.6$  Hz, 1H), 5.22 (s, 2H), 3.91 (t,  $J = 9.4$  Hz, 1H), 3.72 (m, 4H), 2.87 – 2.74 (m, 1H), 2.68 (d,  $J = 9.9$  Hz, 1H), 1.28 (s, 9H);  $^{13}\text{C}$  NMR (126 MHz, Pyridine- $d_5$ )  $\delta$  171.1, 154.5, 154.3, 147.7, 147.0, 140.8, 136.8, 135.8, 135.3, 134.6, 132.5, 131.8, 130.1, 129.7, 129.5, 129.4, 129.4, 129.1, 127.9, 127.7, 126.7, 126.4, 116.7, 113.5, 113.3, 108.7, 90.7, 83.1, 51.9, 49.8, 37.8, 35.6, 32.8, 30.3; HRMS (+ESI) calcd. for  $[\text{C}_{39}\text{H}_{38}\text{N}_4\text{O}_2]$  ( $[\text{M}+\text{H}^+]$ ): 595.3068, found: 595.3059; HPLC (ChiralPak IB column) 99:01 (hex/*i*PrOH) 1mL/min;  $t_{\text{major}}$  (35.3 min),  $t_{\text{minor}}$  (53.6 min); 88% *ee*.

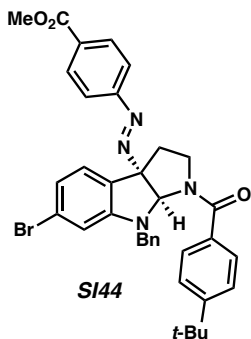

Following the general procedure for the diazation, compound **SI44** was isolated in 52% yield.  $^1\text{H}$  NMR (500 MHz;  $\text{CD}_2\text{Cl}_2$ )  $\delta$  8.16 (d,  $J = 8.1$  Hz, 2H), 7.84 – 7.70 (m, 2H), 7.51 – 7.23 (m, 9H), 7.14 (d,  $J = 7.8$  Hz, 1H), 6.87 (s, 2H), 6.65 –

6.49 (m, 1H), 5.09 (s, 2H), 4.84 (d,  $J = 5.7$  Hz, 1H), 4.07 – 3.78 (m, 4H), 3.66 (s, 1H), 2.57 (ddd,  $J = 24.4, 12.4, 7.0$  Hz, 1H), 1.35 (s, 9H);  $^{13}\text{C}$  NMR (126 MHz,  $\text{CD}_2\text{Cl}_2$ )  $\delta$  168.40, 166.15, 164.54, 130.43, 128.42, 127.26, 126.75, 122.36, 80.72, 53.89, 53.68, 53.46, 53.25, 53.03, 52.25, 49.47, 48.64, 34.75, 30.89; HRMS (+ESI) calcd. for  $[\text{C}_{36}\text{H}_{35}\text{BrN}_4\text{O}_3]$  ( $[\text{M}+\text{H}^+]$ ): 459.2179, found: 459.2187; HPLC (ChiralPak IB column) 98:02 (hex/*i*PrOH) 1 mL/min;  $t_{\text{major}}$  (36.1 min),  $t_{\text{minor}}$  (46.8 min); 92% *ee*.

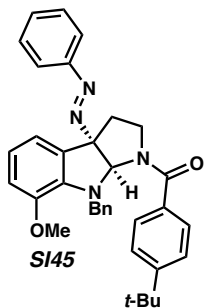

Following the general procedure for the diazotation, compound **SI45** was isolated in 99% yield.  $^1\text{H}$  NMR (500 MHz, pyridine- $d_5$ )  $\delta$  8.26 (d,  $J = 8.2$  Hz, 2H), 7.80 (d,  $J = 8.0$  Hz, 2H), 7.71 (d,  $J = 7.6$  Hz, 2H), 7.57 – 7.47 (m, 4H), 7.29 (m, 6H), 7.04 (d,  $J = 8.6$  Hz, 1H), 6.92 (s, 1H), 5.08 (s, 2H), 3.84 (d,  $J = 2.4$  Hz, 5H), 2.65 (s, 2H), 1.28 (d,  $J = 2.8$  Hz, 9H);  $^{13}\text{C}$  NMR (126 MHz, Pyridine- $d_5$ )  $\delta$  171.0, 166.9, 155.0, 154.7, 153.8, 139.8, 134.2, 133.4, 131.6, 129.6, 128.8, 128.1, 128.1, 127.9, 126.9, 126.3, 123.6, 121.4, 110.6, 89.8, 81.8, 50.4, 49.6, 37.4, 35.6, 31.8, 30.7; HRMS (+ESI) calcd. for  $[\text{C}_{35}\text{H}_{36}\text{N}_4\text{O}_2]$  ( $[\text{M}+\text{H}^+]$ ): 545.2911, found: 545.2922; HPLC (ChiralPak IB column) 98:02 (hex/*i*PrOH) 1 mL/min;  $t_{\text{major}}$  (88.1 min),  $t_{\text{minor}}$  (114.9 min); 96% *ee*.

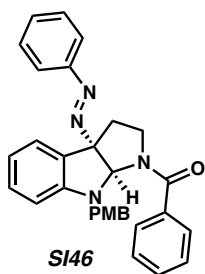

Following the general procedure for the diazotation, compound **SI46** was isolated in 58% yield.  $^1\text{H}$  NMR (500 MHz;  $\text{CD}_2\text{Cl}_2$ )  $\delta$  7.87 – 7.62 (m, 2H), 7.62 – 7.09 (m, 12H), 6.89 – 6.80 (m, 3H), 6.73 (t,  $J = 7.4$  Hz, 1H), 6.50 (d,  $J = 7.9$  Hz, 1H), 4.82 (d,  $J = 4.1$  Hz, 2H), 3.78 (s, 4H), 3.61 (td,  $J = 11.5, 5.2$  Hz, 1H), 2.71 – 2.46 (m, 2H);  $^{13}\text{C}$  NMR (126 MHz,  $\text{CD}_2\text{Cl}_2$ )  $\delta$  170.4, 165.1, 159.2, 152.2, 151.9, 136.5, 131.8, 131.5, 130.7, 129.5, 128.8, 127.9, 127.3, 125.6, 123.0, 118.0, 114.2, 107.0, 89.1, 81.1, 55.7, 49.8, 49.1, 37.1, 30.2; HRMS (+ESI) calcd. for  $[\text{C}_{31}\text{H}_{26}\text{N}_4\text{O}_2]$  ( $[\text{M}+\text{H}^+]$ ): 489.2285, found: 489.2287; HPLC (ChiralPak IB column) 98:02 (hex/*i*PrOH) 1 mL/min;  $t_{\text{major}}$  (22.0 min),  $t_{\text{minor}}$  (18.2 min); 90% *ee*.

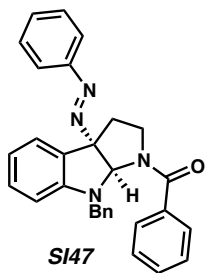

Following the general procedure for the diazotation, compound **SI47** was isolated in 85% yield.  $^1\text{H}$  NMR (500 MHz;  $\text{CD}_2\text{Cl}_2$ )  $\delta$  7.71 (d,  $J = 5.7$  Hz, 2H), 7.50-7.30 (m, 10H), 7.29 (t,  $J = 7.1$  Hz, 2H), 7.23 (t,  $J = 6.9$  Hz, 2H), 7.13 (t,  $J = 7.0$  Hz, 1H), 6.83 (s, 1H), 6.70 (t,  $J = 7.0$  Hz, 1H), 6.41 (d,  $J = 7.5$  Hz, 1H), 4.86-4.84 (m, 2H), 3.77-3.73 (m, 1H), 3.62-3.56 (m, 1H), 2.62-2.50 (m, 2H);  $^{13}\text{C}$  NMR (126 MHz,  $\text{CD}_2\text{Cl}_2$ )  $\delta$  170.4, 165.1, 152.3, 151.9, 140.0, 136.5, 131.6, 130.7, 129.6, 129.5, 128.9, 128.7, 127.8, 127.4, 127.3, 125.6, 123.0, 118.0, 106.8, 89.1, 81.3, 50.3, 49.1, 37.1; HRMS (+ESI) calcd. for  $[\text{C}_{30}\text{H}_{27}\text{N}_4\text{O}]$  ( $[\text{M}+\text{H}^+]$ ): 459.2179, found: 459.2187; HPLC (ChiralPak IB column) 98:02 (hex/*i*PrOH) 1 mL/min;  $t_{\text{major}}$  (20.0 min),  $t_{\text{minor}}$  (17.3 min); 89% *ee*.

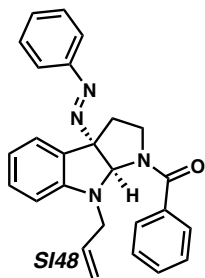

Following the general procedure for the diazation, compound **SI48** was isolated in 98% yield.  $^1\text{H}$  NMR (500 MHz;  $\text{CD}_2\text{Cl}_2$ )  $\delta$  7.73 (dd,  $J = 7.2, 2.4$  Hz, 2H), 7.45 (ddt,  $J = 34.2, 13.5, 6.1$  Hz, 8H), 7.18 (ddd,  $J = 20.0, 11.9, 7.3$  Hz, 2H), 6.73 (s, 1H), 6.70 (t,  $J = 7.4$  Hz, 1H), 6.50 (d,  $J = 7.9$  Hz, 1H), 6.05 – 5.89 (m, 1H), 5.28 (dd,  $J = 17.2, 2.2$  Hz, 1H), 5.14 (d,  $J = 10.2$  Hz, 1H), 4.37 – 4.15 (m, 2H), 3.81 – 3.67 (m, 1H), 3.55 (td,  $J = 11.3, 6.1$  Hz, 1H), 2.54 (qd,  $J = 11.7, 6.5$  Hz, 2H);  $^{13}\text{C}$  NMR (126 MHz,  $\text{CD}_2\text{Cl}_2$ )  $\delta$  170.4, 165.1, 152.3, 136.6, 130.8, 129.5, 128.8, 128.5, 127.9, 127.8, 125.4, 123.0, 117.9, 115.9, 107.1, 89.0, 81.3, 66.2, 49.2, 42.2, 36.9, 30.2; HRMS (+ESI) calcd. for  $[\text{C}_{30}\text{H}_{27}\text{N}_4\text{O}]$  ( $[\text{M}+\text{H}^+]$ ): 409.2023, found: 409.2027; HPLC (ChiralPak IB column) 99:01 (hex/*i*PrOH) 1mL/min;  $t_{\text{major}}$  (13.2 min),  $t_{\text{minor}}$  (14.9 min); 69% *ee*.

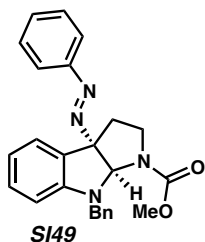

Following the general procedure for the diazation, compound **SI49** was isolated in 85% yield.  $^1\text{H}$  NMR (500 MHz;  $\text{CD}_2\text{Cl}_2$ ):  $\delta$  7.72 (dd,  $J = 6.5, 3.0$  Hz, 2H), 7.66-7.11 (m, 15H), 7.01 (d,  $J = 7.9$  Hz, 1H), 6.92-6.77 (m, 2H), 6.41 (d,  $J = 7.5$  Hz, 1H), 4.86-4.84 (m, 2H), 3.77-3.73 (m, 1H), 3.62-3.56 (m, 1H), 2.62-2.50 (m, 2H);  $^{13}\text{C}$  NMR (126 MHz,  $\text{CD}_2\text{Cl}_2$ ):  $\delta$  170.4, 165.1, 152.3, 151.9, 140.0, 136.5, 131.6, 130.7, 129.6, 128.9, 128.71, 127.8, 127.4, 127.3, 125.6, 123.0, 118.0, 106.8, 89.1, 81.3, 50.3, 49.1, 37.1 ppm; HRMS (+ESI) calcd. for  $[\text{C}_{25}\text{H}_{24}\text{N}_4\text{O}_2]$  ( $[\text{M}+\text{H}^+]$ ): 413.1972, found: 413.1976; HPLC (ChiralPak IB column) 99:01 (hexane/*i*PrOH) 1mL/min;  $t_{\text{major}}$  (9.0 min),  $t_{\text{minor}}$  (8.0 min); 73% *ee*.

#### G. Procedure for photolysis reaction

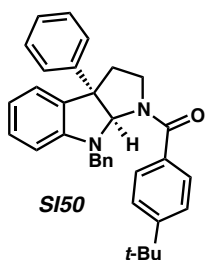

**SI28** (xx mg, xx mmol) was dissolved in cyclohexane (xx mL) in a 20 mL pyrex round-bottom flask, and sparged with nitrogen for 1 hour. The solvent was removed by rotary evaporation at elevated temperature (ca. 35 °C) to avoid freezing the cyclohexane. It is imperative that rapid rotation is maintained, as a widely-distributed, thin film is desired. The flask was backfilled with nitrogen and placed in a Rayonet photobox equipped with UVB spectrum bulbs for 12 h. NMR analysis using Toluene as an internal standard in  $\text{CD}_2\text{Cl}_2$  indicated 78% conversion of starting material and 42% yield of the product. The product (**SI50**) was difficult to separate from the starting diazene in good yield. Extension of the reaction times, followed by preparatory TLC, allowed for isolation of the product in 36% yield.  $^1\text{H}$  NMR (400 MHz,  $\text{CD}_2\text{Cl}_2$ )  $\delta$  7.49 – 7.24 (m, 14H), 7.09 (td,  $J = 7.6, 1.3$  Hz, 1H), 7.06 – 6.99 (d, 1H), 6.69 (t,  $J = 7.4$  Hz, 1H), 6.50 – 6.37 (m, 2H), 5.00 – 4.63 (m, 2H), 3.90 – 3.73 (m, 1H), 3.59 – 3.37 (m, 1H), 2.69 – 2.52 (m, 2H), 1.36 (s, 9H);  $^{13}\text{C}$  NMR (101 MHz,  $\text{CD}_2\text{Cl}_2$ )  $\delta$  170.09, 153.72, 150.12, 145.05, 139.38, 133.08, 132.96, 129.47, 128.59, 128.51, 128.33, 127.37, 127.00, 126.75, 125.61, 125.04, 123.85, 117.61, 115.20, 106.39, 85.35, 59.42, 49.43, 38.40, 34.72, 30.91; HRMS (+ESI) calcd. for  $[\text{C}_{34}\text{H}_{34}\text{N}_2\text{O}]$  ( $[\text{M}+\text{H}^+]$ ): 487.2744, found: 287.2750; HPLC (ChiralPak IB column) 99.5:0.05 (hex/*i*PrOH) 0.5mL/min;  $t_{\text{major}}$  (9.0 min),  $t_{\text{minor}}$  (8.0 min); 93% *ee*.



**III. HPLC Traces**

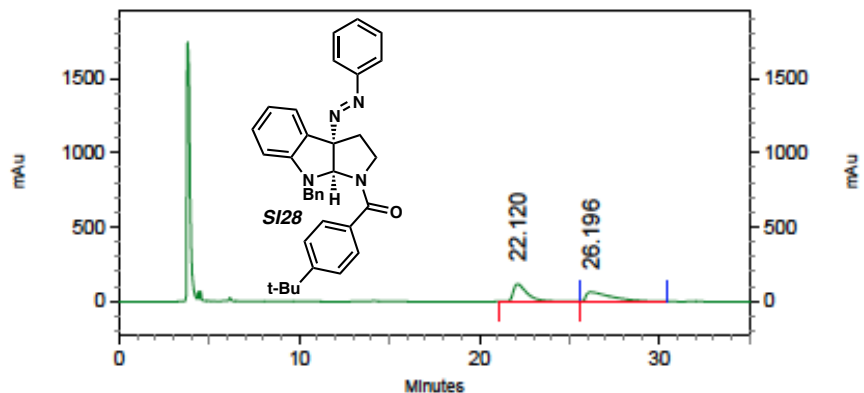

2: 260 nm, 4 nm Results

| Retention Time | Area    | Area Percent | Lambda Max |
|----------------|---------|--------------|------------|
| 22.120         | 6316275 | 50.544       | 204        |
| 26.196         | 6180277 | 49.456       | 204        |

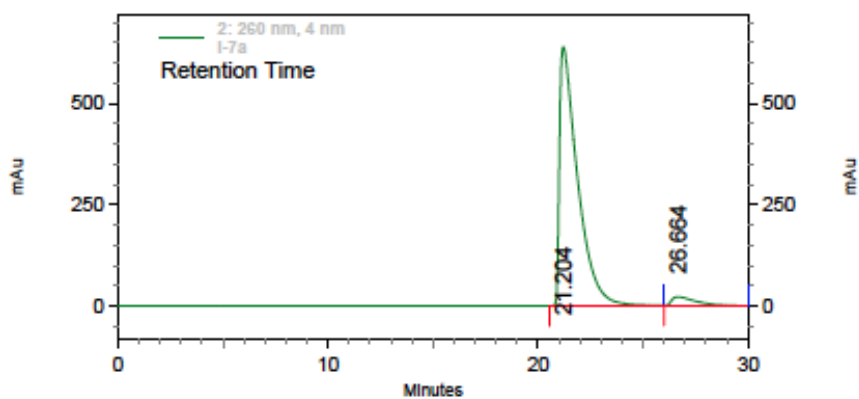

2: 260 nm, 4 nm Results

| Retention Time | Area     | Area Percent | Lambda Max |
|----------------|----------|--------------|------------|
| 21.204         | 38505911 | 95.502       | 206        |
| 26.664         | 1813385  | 4.498        | 205        |

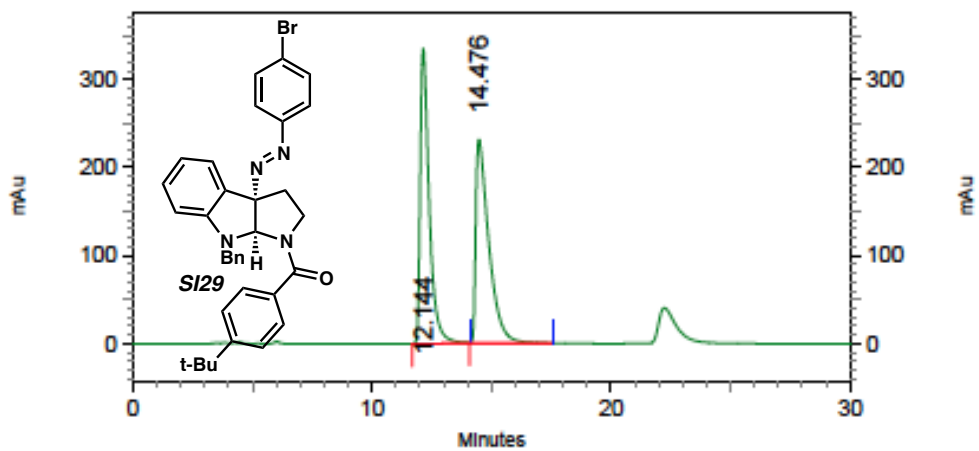

2: 260 nm, 4

nm Results

| Retention Time | Area    | Area Percent | Lambda Max |
|----------------|---------|--------------|------------|
| 12.144         | 8807005 | 50.020       | 206        |
| 14.476         | 8799787 | 49.980       | 206        |

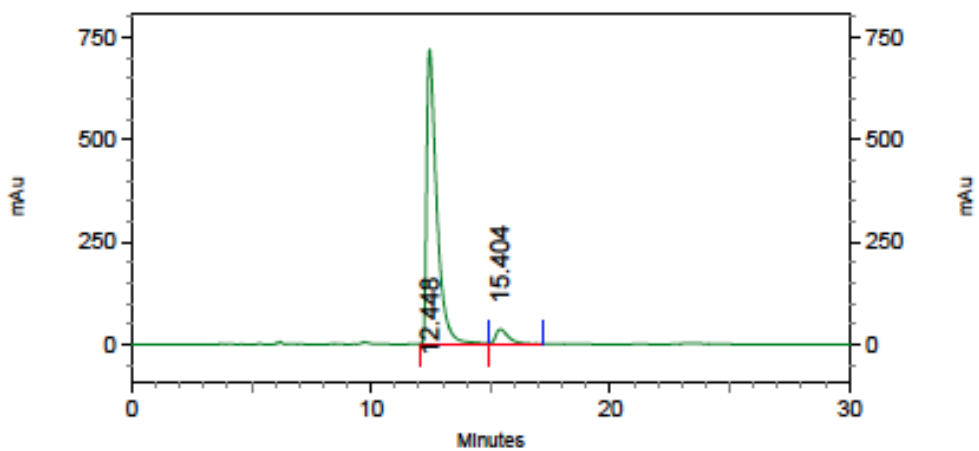

2: 260 nm, 4

nm Results

| Retention Time | Area     | Area Percent | Lambda Max |
|----------------|----------|--------------|------------|
| 12.448         | 21091116 | 94.110       | 207        |
| 15.404         | 1320011  | 5.890        | 206        |

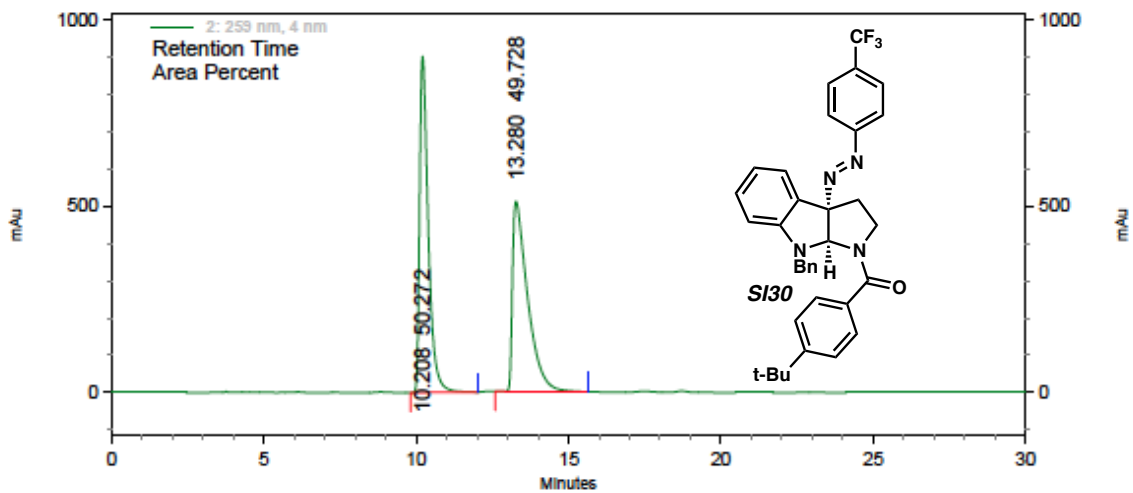

2: 259

nm, 4

nm

Results

| Pk # | Retention Time | Area     | Area Percent | Lambda Max |
|------|----------------|----------|--------------|------------|
| 1    | 10.208         | 17855081 | 50.272       | 207        |
| 2    | 13.280         | 17661687 | 49.728       | 207        |

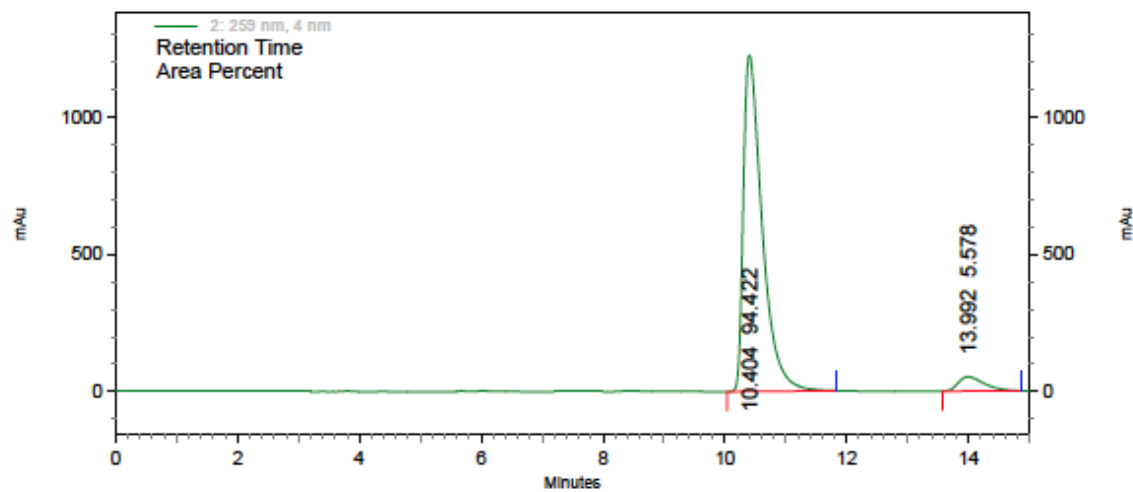

2: 259

nm, 4

nm

Results

| Pk # | Retention Time | Area     | Area Percent | Lambda Max |
|------|----------------|----------|--------------|------------|
| 1    | 10.404         | 26176166 | 94.422       | 209        |
| 2    | 13.992         | 1546483  | 5.578        | 206        |

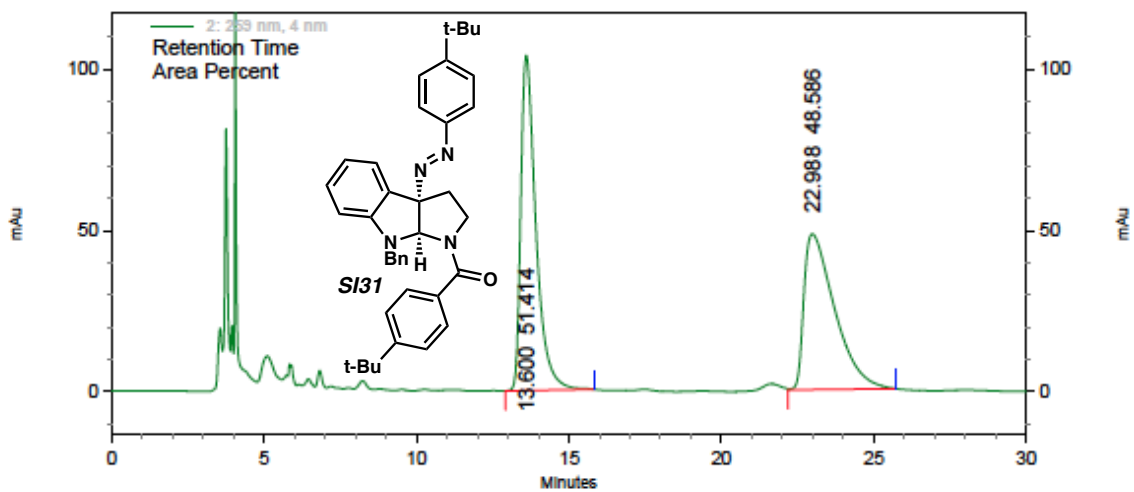

2: 259  
nm, 4  
nm  
Results

| Pk # | Retention Time | Area    | Area Percent | Lambda Max |
|------|----------------|---------|--------------|------------|
| 1    | 13.600         | 3584506 | 51.414       | 205        |
| 2    | 22.988         | 3387369 | 48.586       | 205        |

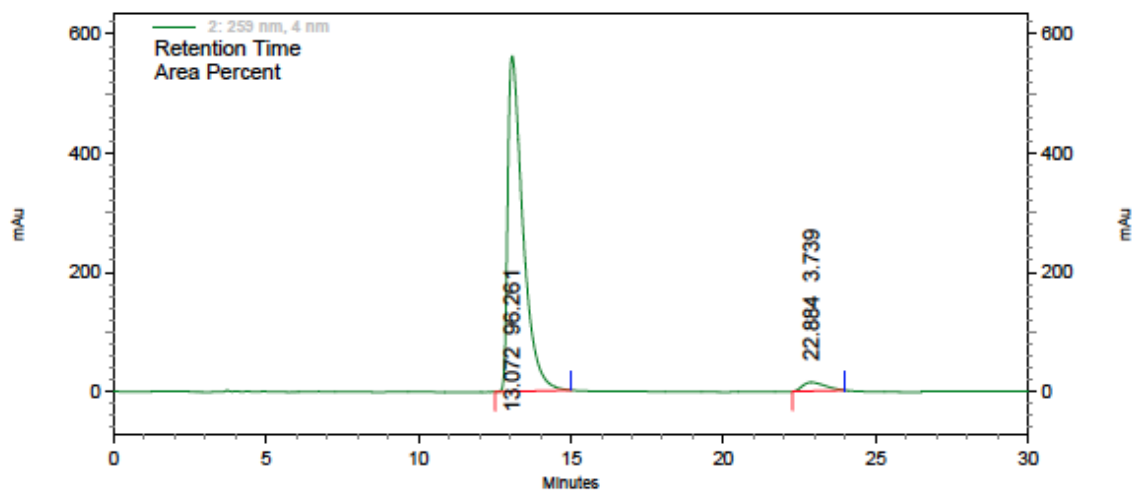

2: 259  
nm, 4  
nm  
Results

| Pk # | Retention Time | Area     | Area Percent | Lambda Max |
|------|----------------|----------|--------------|------------|
| 1    | 13.072         | 19496513 | 96.261       | 206        |
| 2    | 22.884         | 757254   | 3.739        | 205        |

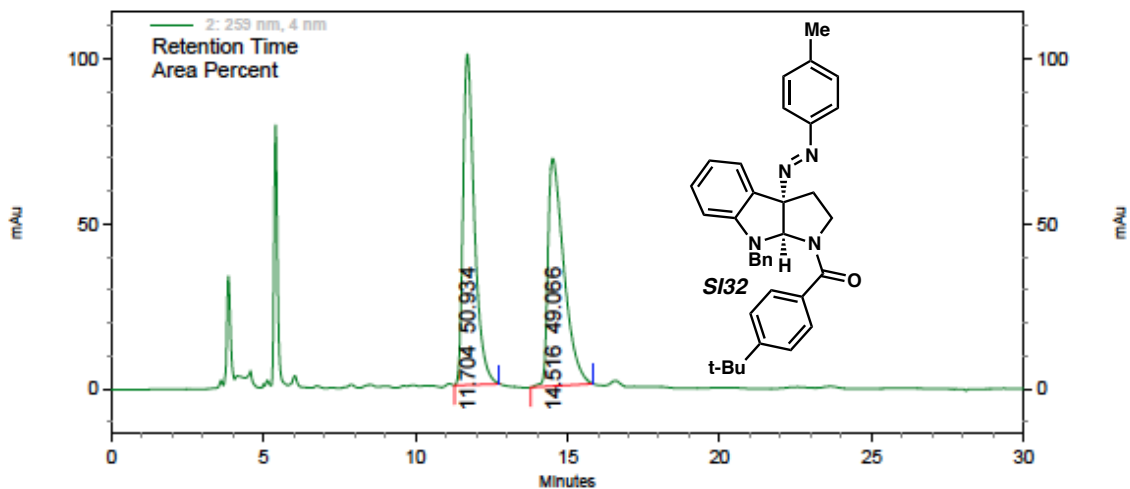

2: 259

nm, 4

nm

Results

| Pk # | Retention Time | Area    | Area Percent | Lambda Max |
|------|----------------|---------|--------------|------------|
| 1    | 11.704         | 2614780 | 50.934       | 206        |
| 2    | 14.516         | 2518871 | 49.066       | 206        |

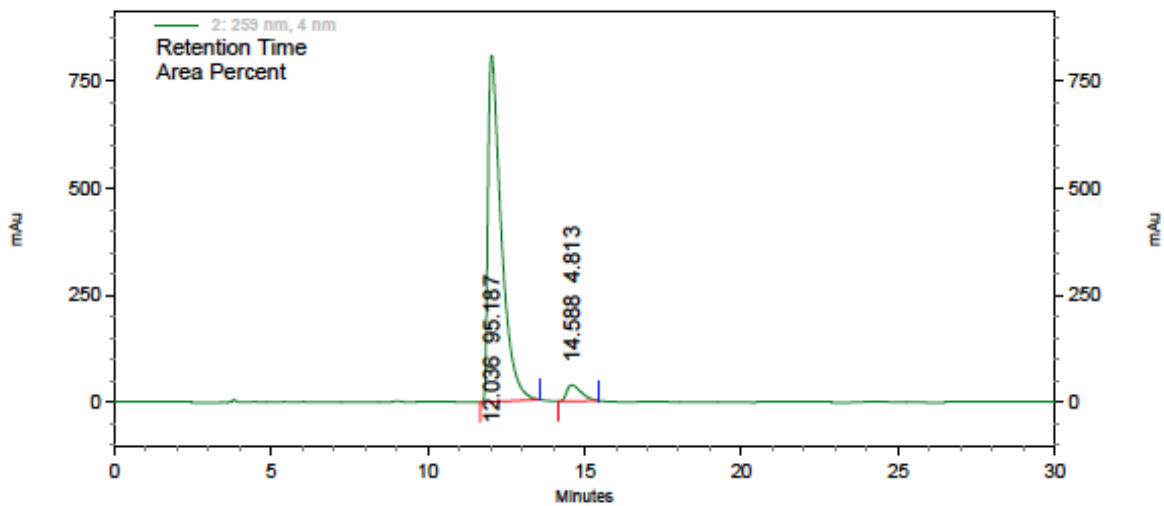

2: 259

nm, 4

nm

Results

| Pk # | Retention Time | Area     | Area Percent | Lambda Max |
|------|----------------|----------|--------------|------------|
| 1    | 12.036         | 23835140 | 95.187       | 207        |
| 2    | 14.588         | 1205244  | 4.813        | 206        |

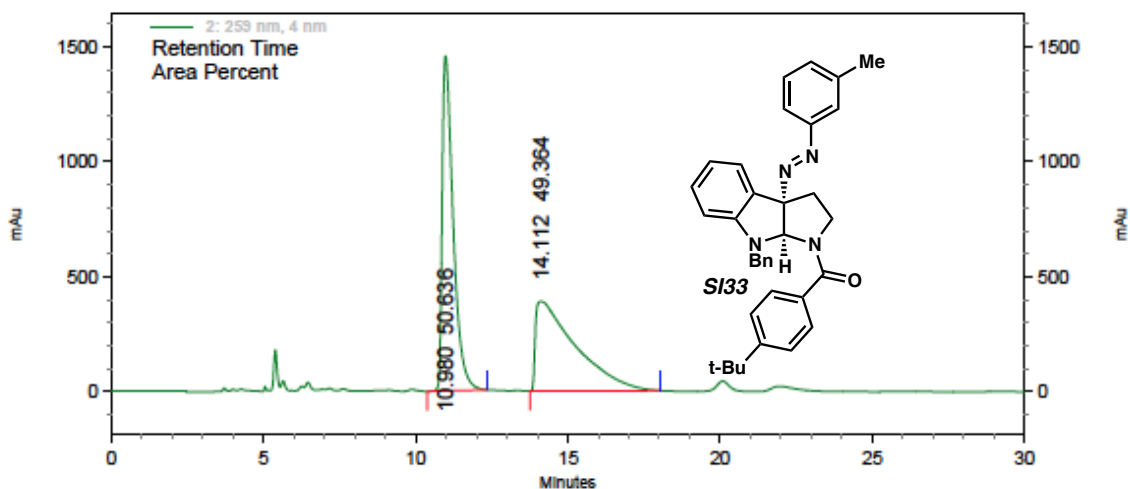

2: 259  
nm, 4  
nm  
Results

| Pk # | Retention Time | Area     | Area Percent | Lambda Max |
|------|----------------|----------|--------------|------------|
| 1    | 10.980         | 36542873 | 50.636       | 208        |
| 2    | 14.112         | 35625010 | 49.364       | 207        |

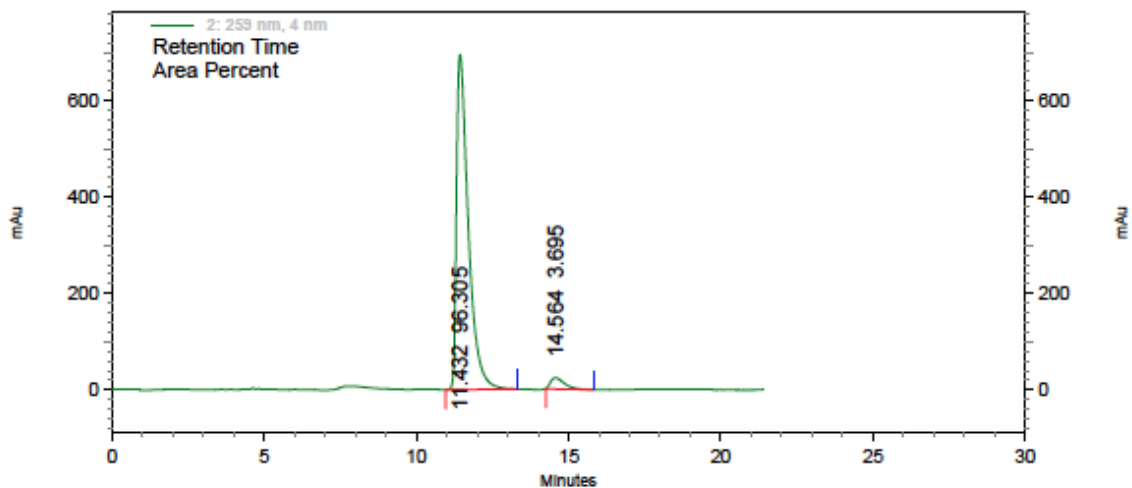

2: 259  
nm, 4  
nm  
Results

| Pk # | Retention Time | Area     | Area Percent | Lambda Max |
|------|----------------|----------|--------------|------------|
| 1    | 11.432         | 18801723 | 96.305       | 207        |
| 2    | 14.564         | 721339   | 3.695        | 206        |

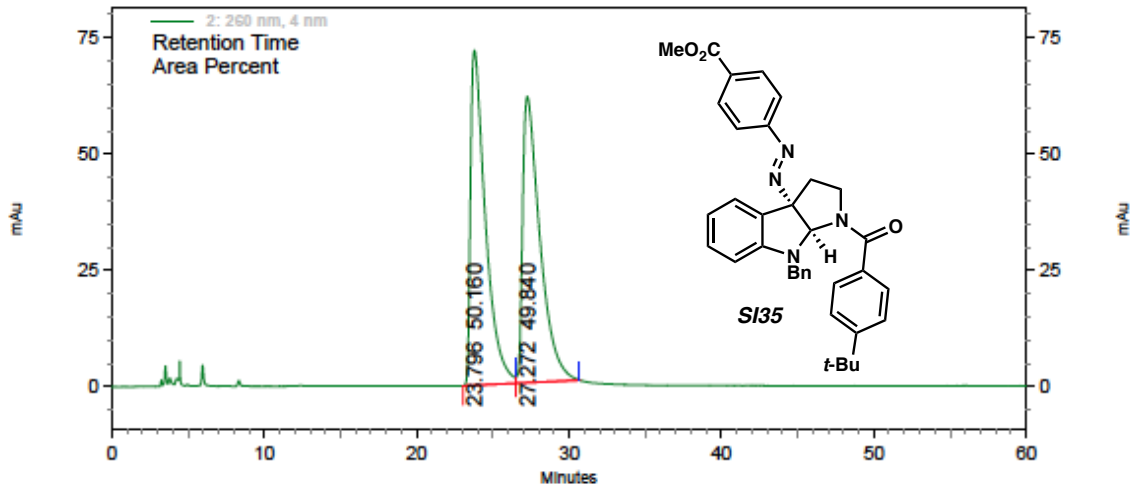

2: 260  
nm, 4  
nm

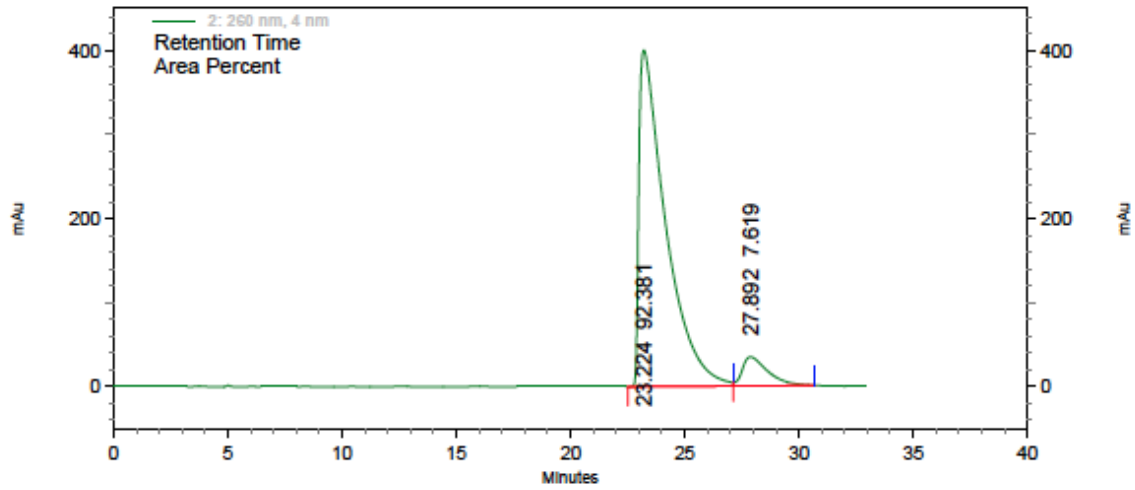

2: 260  
nm, 4  
nm

Results

| Pk # | Retention Time | Area     | Area Percent | Lambda Max |
|------|----------------|----------|--------------|------------|
| 1    | 23.224         | 32537856 | 92.381       | 207        |
| 2    | 27.892         | 2683649  | 7.619        | 206        |



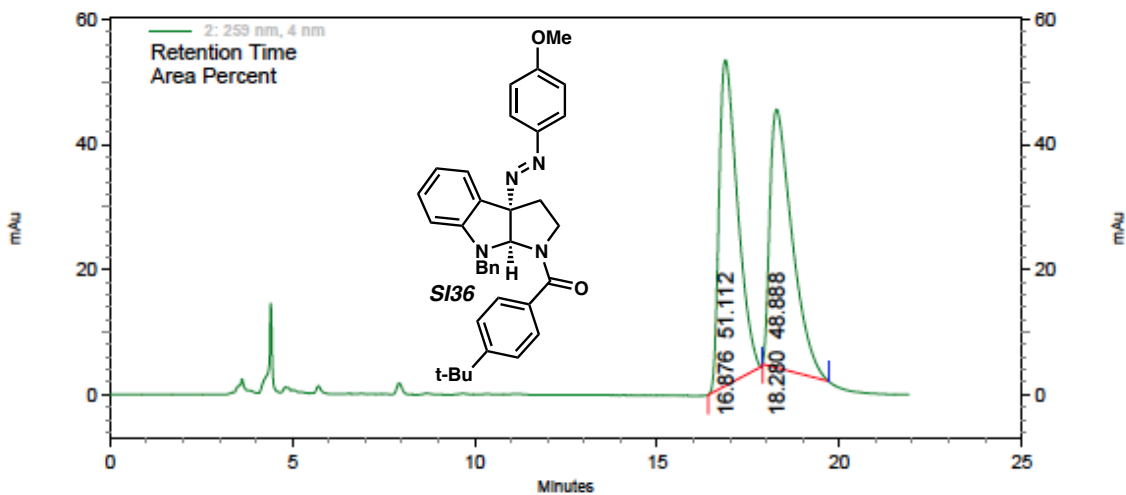

2: 259  
nm, 4  
nm

Results

| Pk # | Retention Time | Area    | Area Percent | Lambda Max |
|------|----------------|---------|--------------|------------|
| 1    | 16.876         | 1833504 | 51.112       | 206        |
| 2    | 18.280         | 1753709 | 48.888       | 206        |

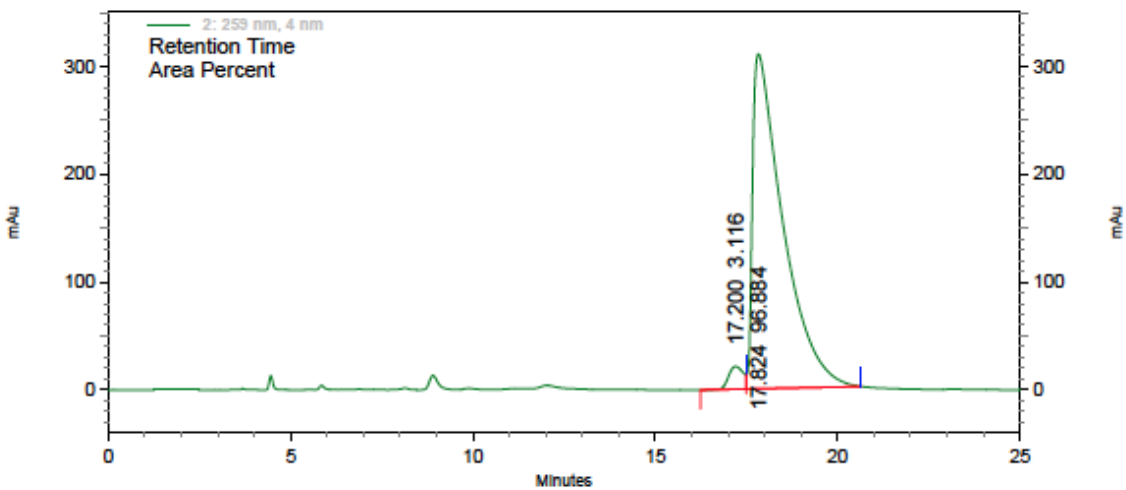

2: 259  
nm, 4  
nm

Results

| Pk # | Retention Time | Area     | Area Percent | Lambda Max |
|------|----------------|----------|--------------|------------|
| 1    | 17.200         | 578774   | 3.116        | 206        |
| 2    | 17.824         | 17993450 | 96.884       | 207        |

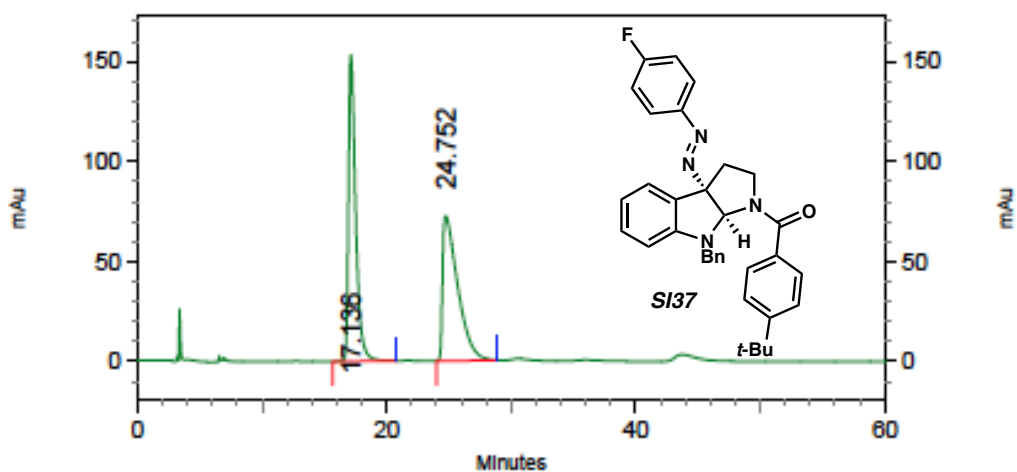

1: 260 nm, 4  
nm Results

| Retention Time | Area    | Area Percent | Lambda Max |
|----------------|---------|--------------|------------|
| 17.136         | 6184611 | 50.148       | 200        |
| 24.752         | 6148019 | 49.852       | 200        |

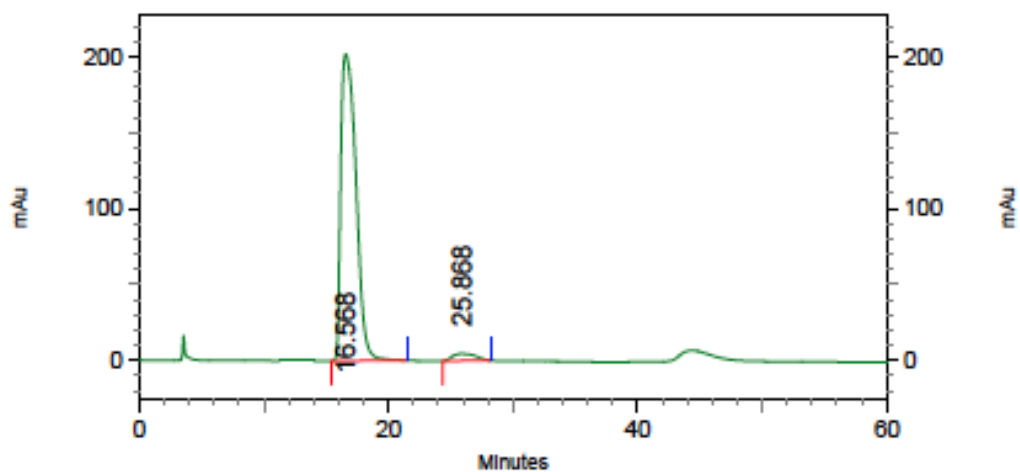

1: 260 nm, 4  
nm Results

| Retention Time | Area     | Area Percent | Lambda Max |
|----------------|----------|--------------|------------|
| 16.568         | 17162412 | 96.646       | 200        |
| 25.868         | 595653   | 3.354        | 205        |

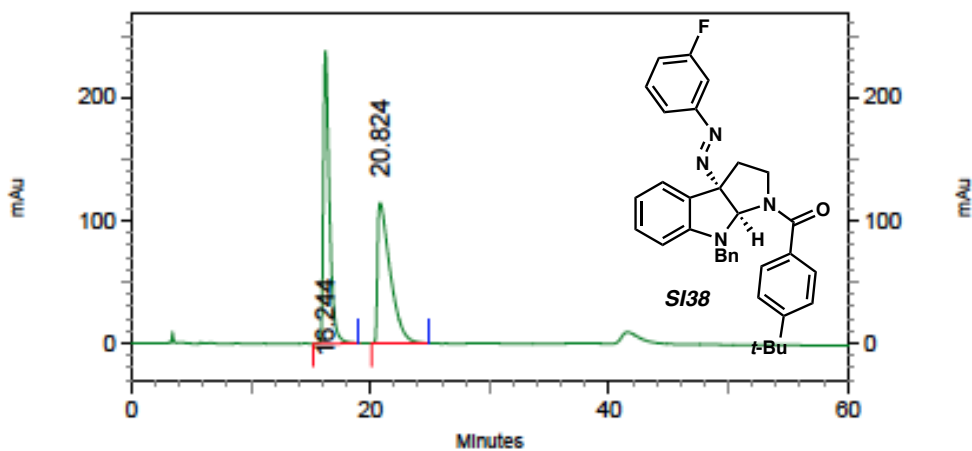

1: 260 nm, 4  
nm Results

| Retention Time | Area    | Area Percent | Lambda Max |
|----------------|---------|--------------|------------|
| 16.244         | 8402440 | 49.809       | 201        |
| 20.824         | 8466894 | 50.191       | 201        |

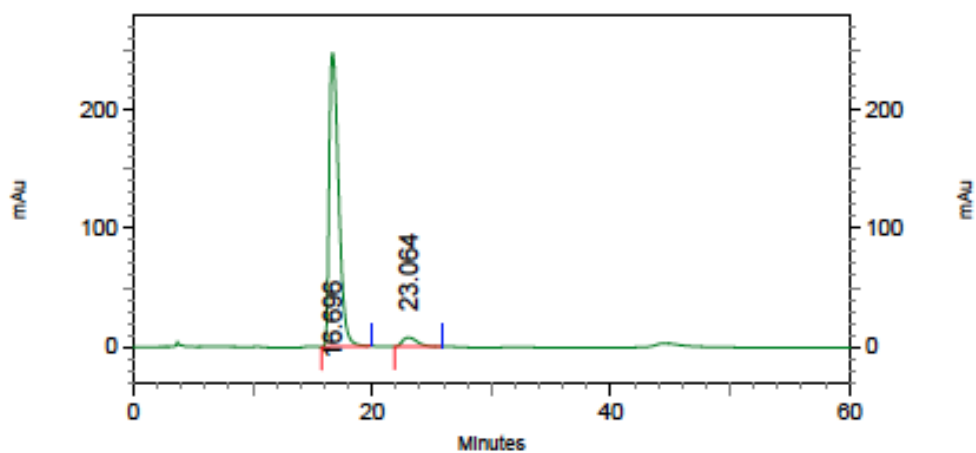

1: 260 nm, 4  
nm Results

| Retention Time | Area     | Area Percent | Lambda Max |
|----------------|----------|--------------|------------|
| 16.696         | 13653398 | 95.417       | 200        |
| 23.064         | 655849   | 4.583        | 200        |

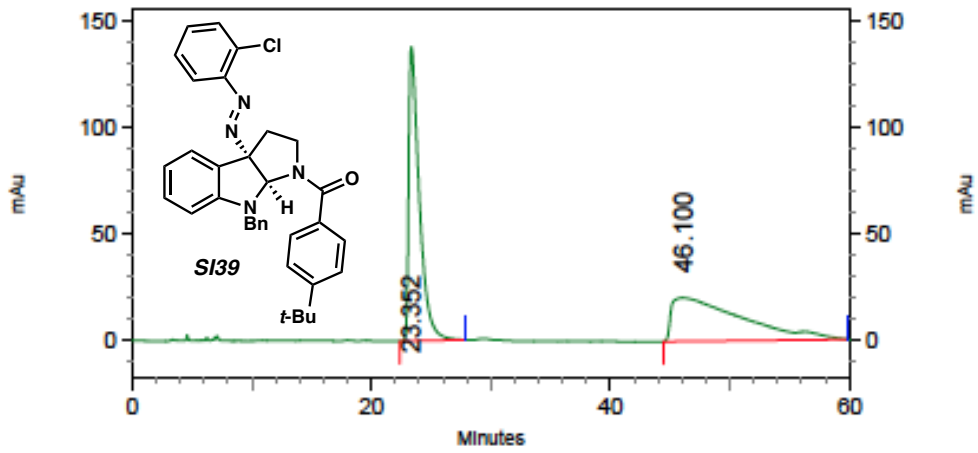

3: 288 nm, 4  
nm Results

| Retention Time | Area    | Area Percent | Lambda Max |
|----------------|---------|--------------|------------|
| 23.352         | 8545996 | 50.401       | 201        |
| 46.100         | 8410104 | 49.599       | 201        |

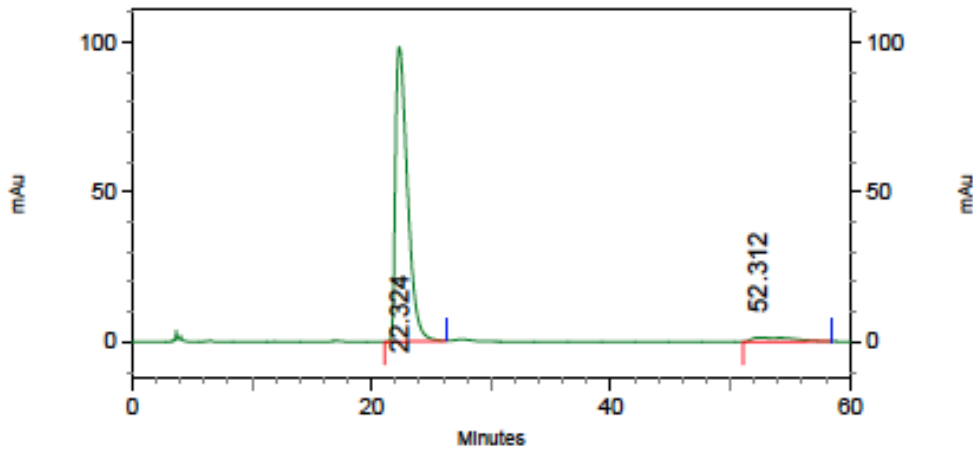

3: 288 nm, 4  
nm Results

| Retention Time | Area    | Area Percent | Lambda Max |
|----------------|---------|--------------|------------|
| 22.324         | 6876351 | 95.530       | 201        |
| 52.312         | 321723  | 4.470        | 200        |

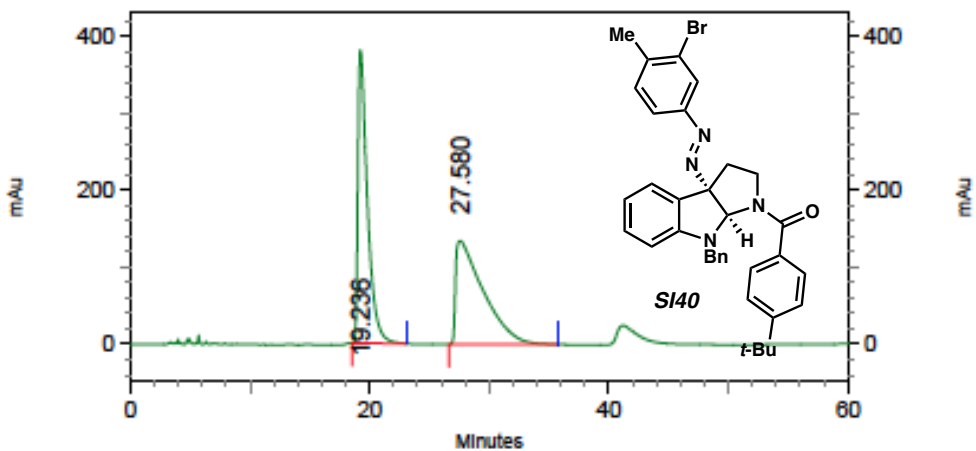

1: 260 nm, 4  
nm Results

| Retention Time | Area     | Area Percent | Lambda Max |
|----------------|----------|--------------|------------|
| 19.236         | 20944168 | 49.212       | 200        |
| 27.580         | 21614974 | 50.788       | 200        |

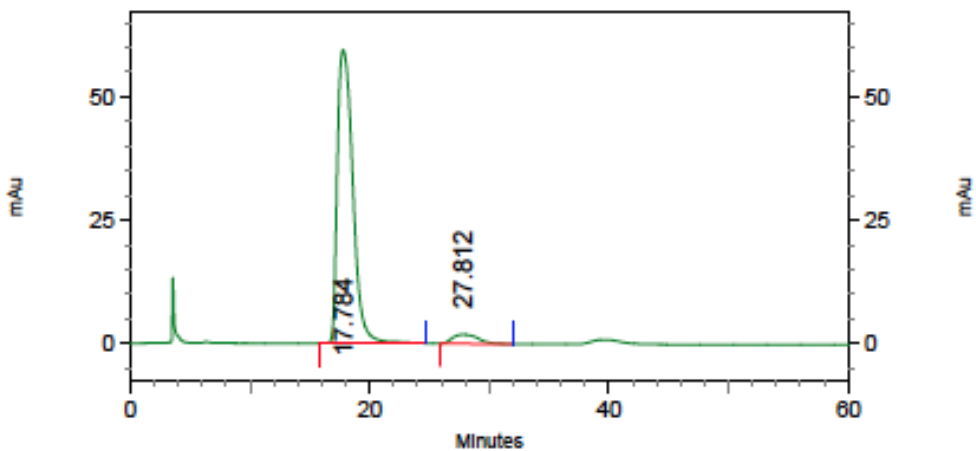

1: 260 nm, 4  
nm Results

| Retention Time | Area    | Area Percent | Lambda Max |
|----------------|---------|--------------|------------|
| 17.784         | 5355126 | 95.164       | 201        |
| 27.812         | 272149  | 4.836        | 206        |

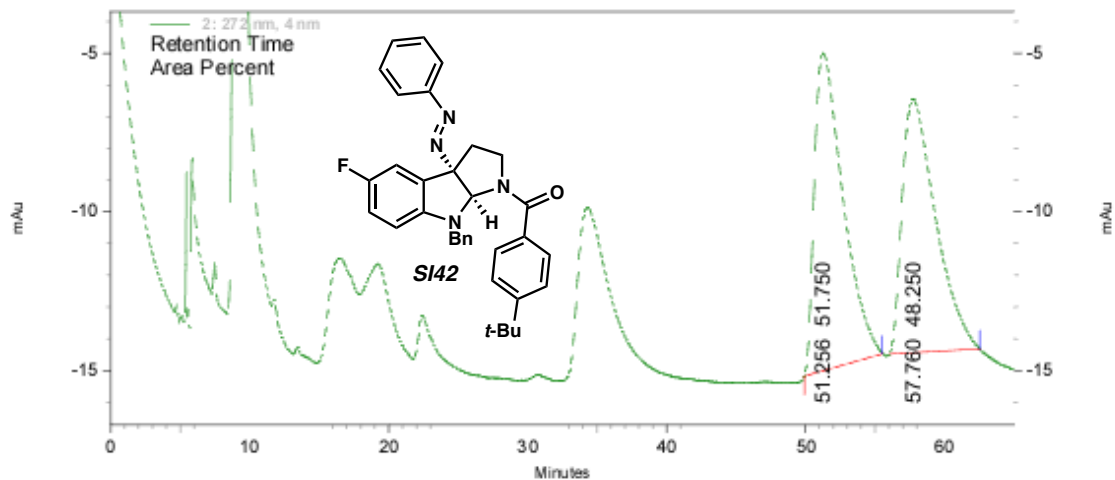

2: 272 nm, 4 nm

Results

| Pk # | Retention Time | Area Percent | Lambda Max |
|------|----------------|--------------|------------|
| 1    | 51.256         | 51.750       | 202        |
| 2    | 57.760         | 48.250       | 202        |

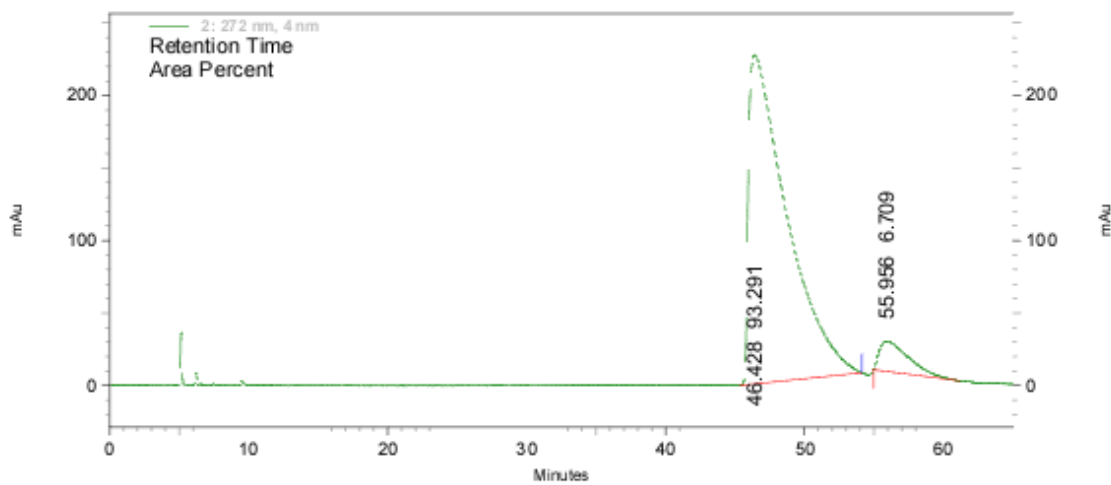

2: 272 nm, 4 nm

Results

| Pk # | Retention Time | Area Percent | Lambda Max |
|------|----------------|--------------|------------|
| 1    | 46.428         | 93.291       | 249        |
| 2    | 55.956         | 6.709        | 203        |

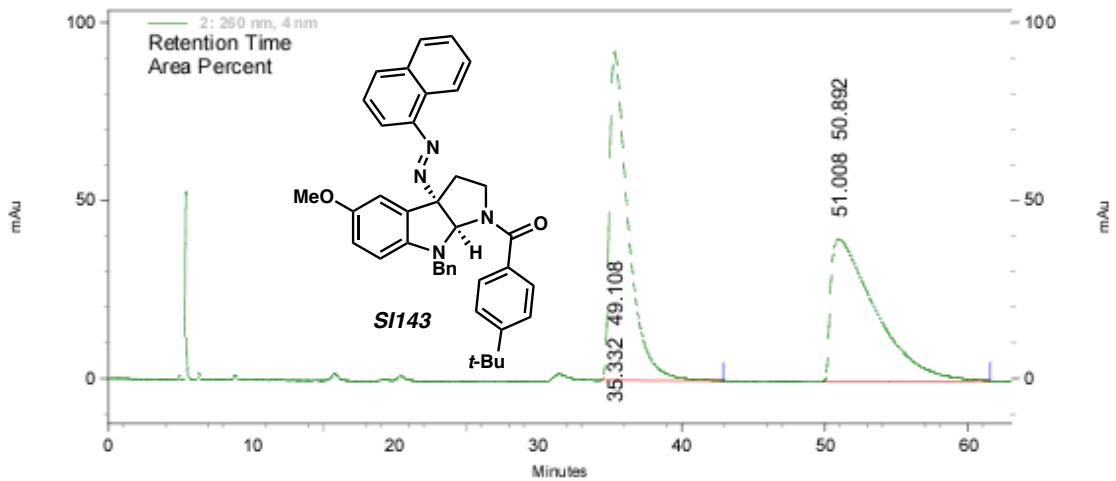

2: 260 nm, 4 nm  
Results

| Pk # | Retention Time | Area Percent | Lambda Max |
|------|----------------|--------------|------------|
| 1    | 35.332         | 49.108       | 243        |
| 2    | 51.008         | 50.892       | 213        |

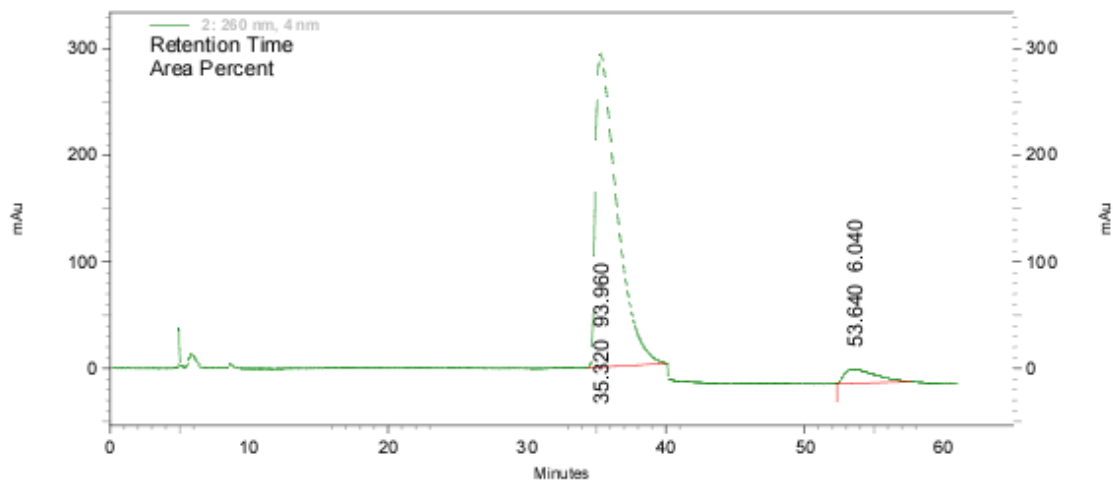

2: 260 nm, 4 nm  
Results

| Pk # | Retention Time | Area Percent | Lambda Max |
|------|----------------|--------------|------------|
| 1    | 35.320         | 93.960       | 199        |
| 2    | 53.640         | 6.040        | 212        |

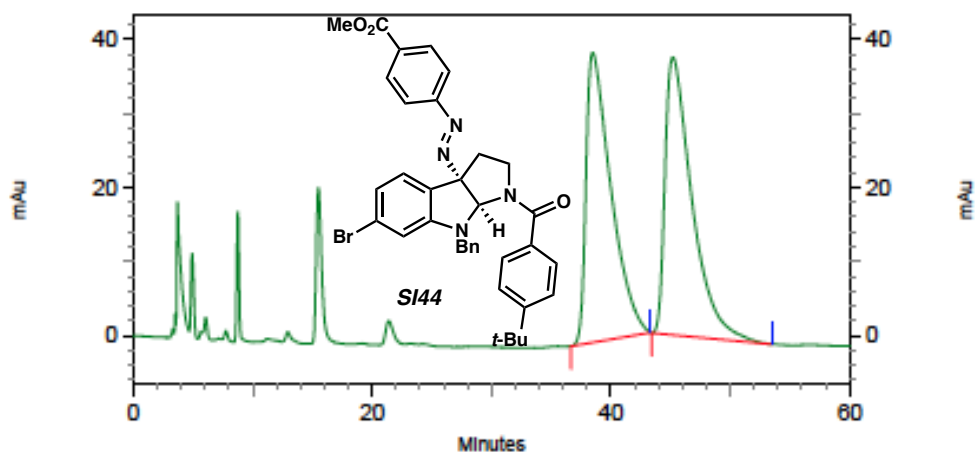

1: 260 nm, 4

nm Results

| Retention Time | Area    | Area Percent | Lambda Max |
|----------------|---------|--------------|------------|
| 38.468         | 5670283 | 49.090       | 198        |
| 45.196         | 5880573 | 50.910       | 199        |

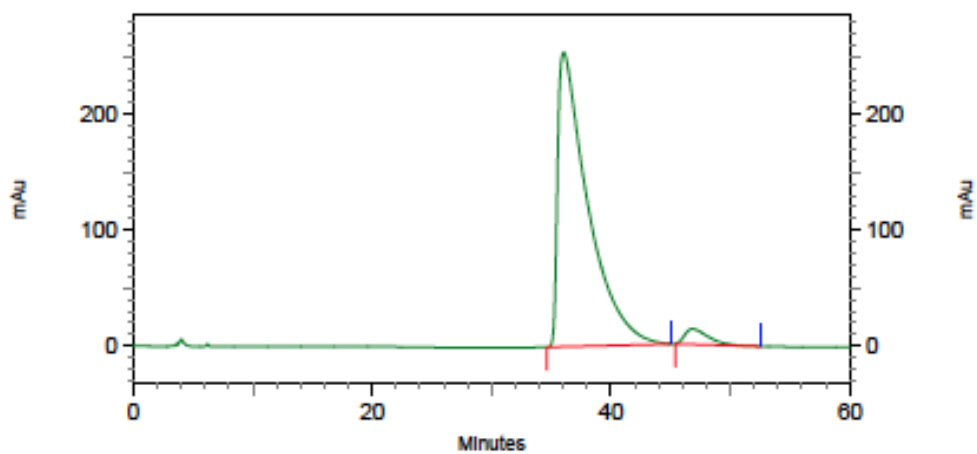

1: 260 nm, 4

nm Results

| Retention Time | Area     | Area Percent | Lambda Max |
|----------------|----------|--------------|------------|
| 36.052         | 44456874 | 96.048       | 199        |
| 46.848         | 1829156  | 3.952        | 205        |



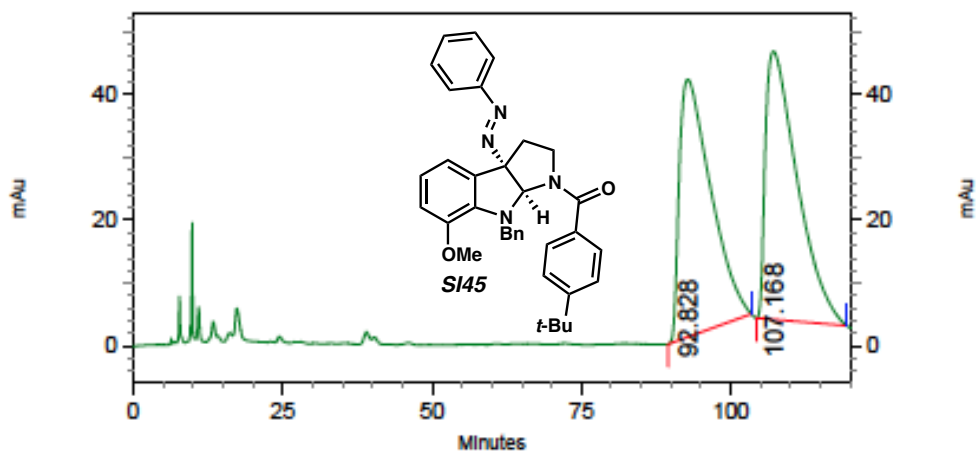

1: 259 nm, 4  
nm Results

| Retention Time | Area     | Area Percent | Lambda Max |
|----------------|----------|--------------|------------|
| 92.828         | 14998304 | 48.685       | 197        |
| 107.168        | 15808275 | 51.315       | 197        |

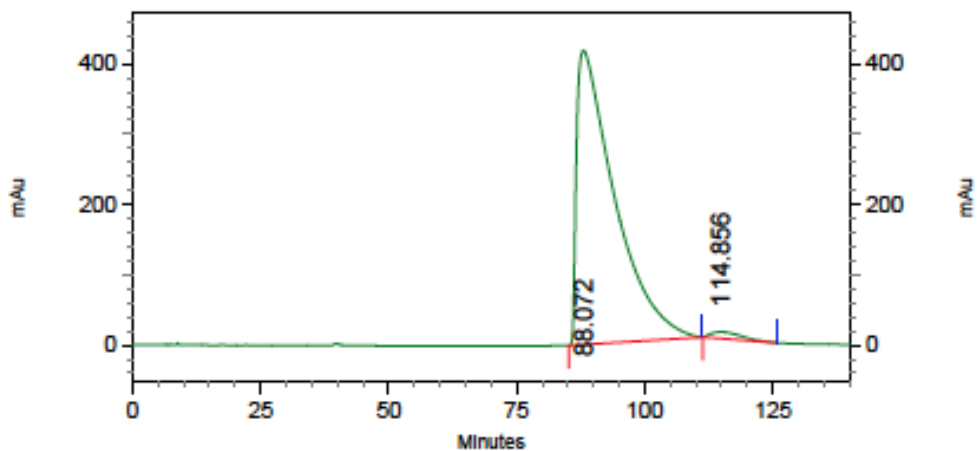

1: 259 nm, 4  
nm Results

| Retention Time | Area      | Area Percent | Lambda Max |
|----------------|-----------|--------------|------------|
| 88.072         | 216051561 | 98.245       | 197        |
| 114.856        | 3858445   | 1.755        | 196        |

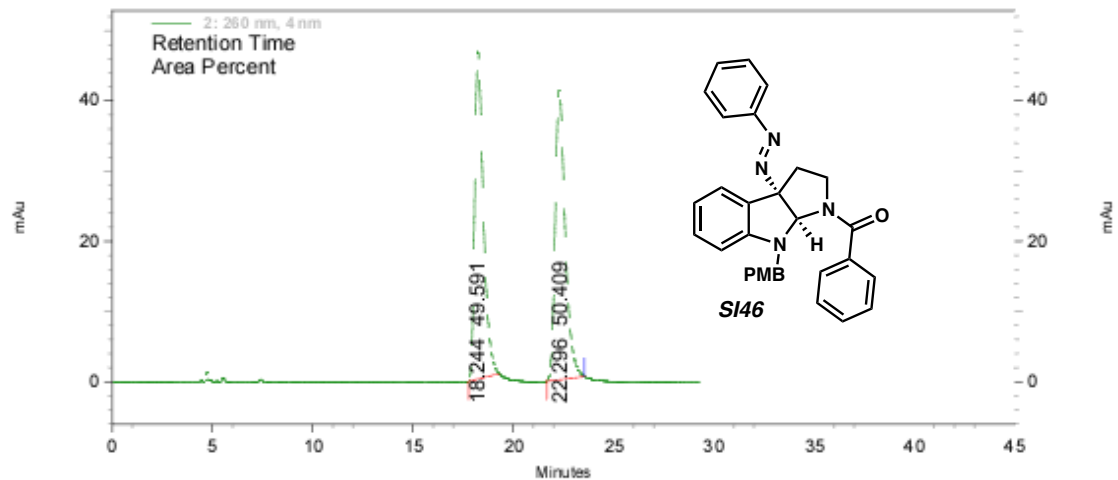

2: 260 nm, 4 nm

Results

| Pk # | Retention Time | Area Percent | Lambda Max |
|------|----------------|--------------|------------|
| 1    | 18.244         | 49.591       | 203        |
| 2    | 22.296         | 50.409       | 203        |

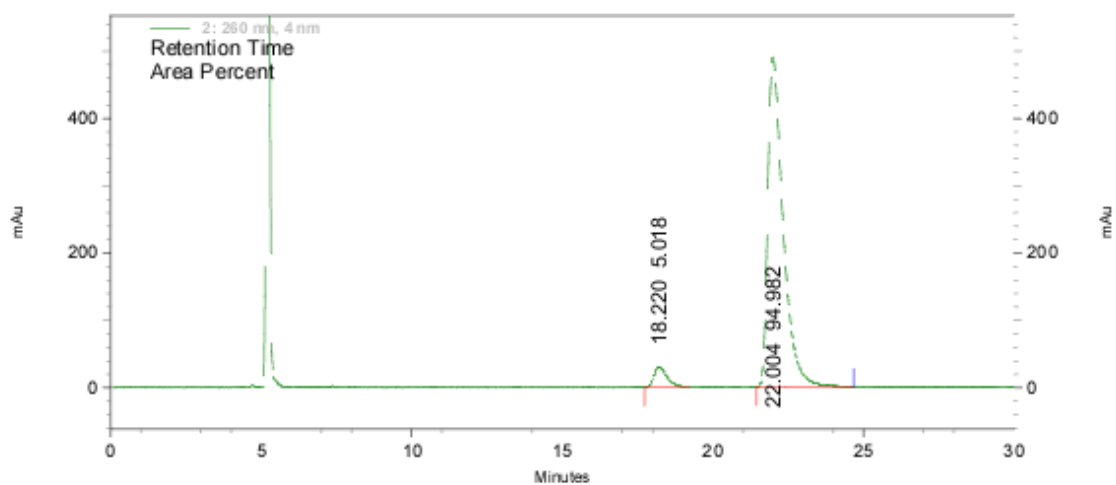

2: 260 nm, 4 nm

Results

| Pk # | Retention Time | Area Percent | Lambda Max |
|------|----------------|--------------|------------|
| 1    | 18.220         | 5.018        | 204        |
| 2    | 22.004         | 94.982       | 198        |

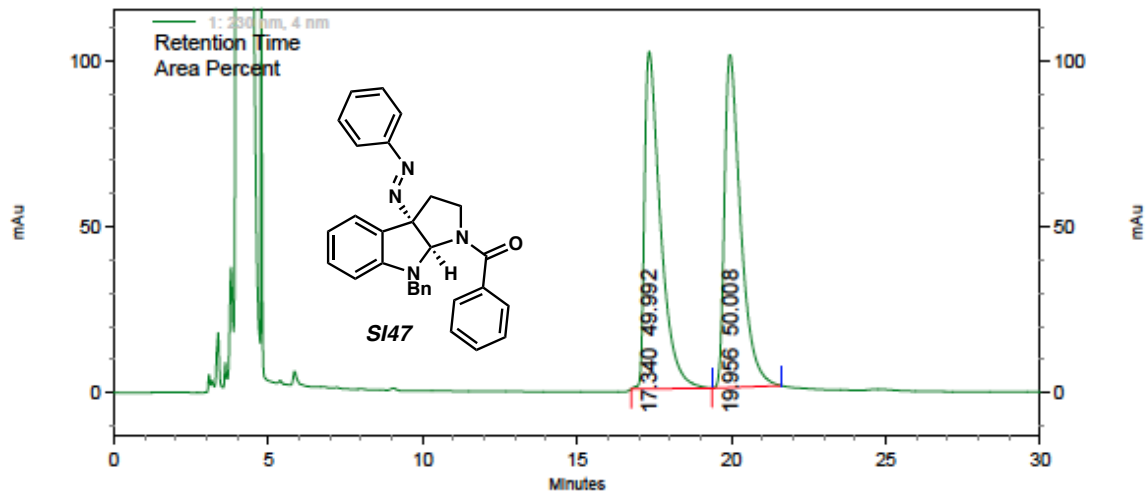

1: 230 nm,  
4 nm Results

| Pk # | Retention Time | Area    | Area Percent | Lambda Max |
|------|----------------|---------|--------------|------------|
| 1    | 17.340         | 3666526 | 49.992       | 203        |
| 2    | 19.956         | 3667705 | 50.008       | 203        |

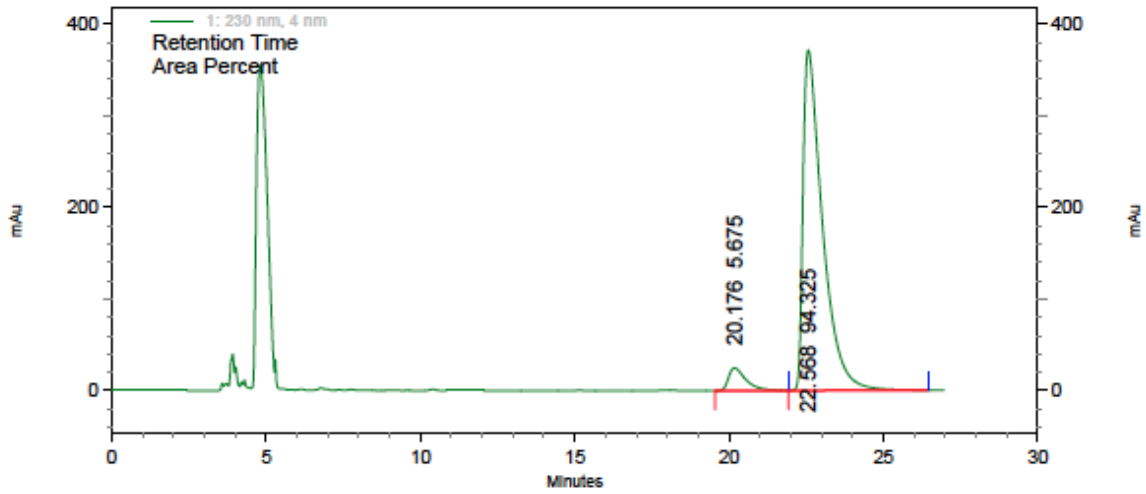

1: 230  
nm, 4  
nm  
Results

| Pk # | Retention Time | Area     | Area Percent | Lambda Max |
|------|----------------|----------|--------------|------------|
| 1    | 20.176         | 980710   | 5.675        | 205        |
| 2    | 22.568         | 16299679 | 94.325       | 197        |

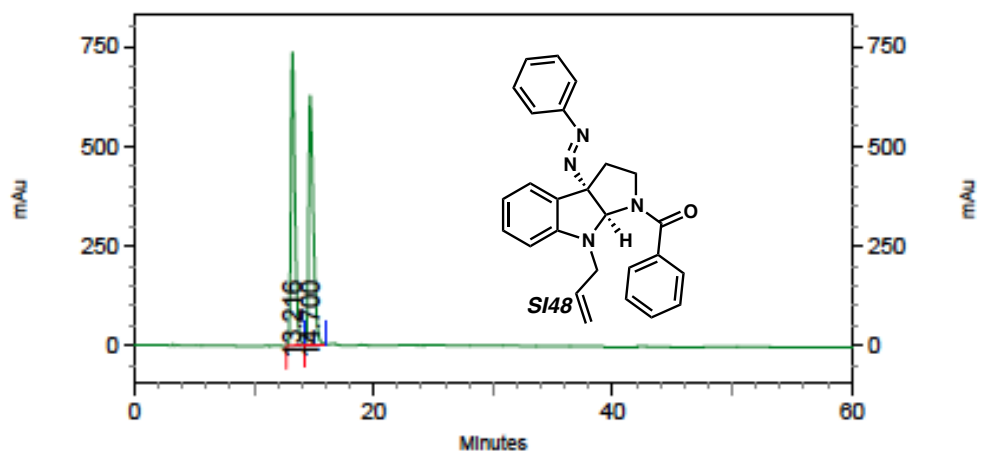

3: 260 nm, 4  
nm Results

| Retention Time | Area     | Area Percent | Lambda Max |
|----------------|----------|--------------|------------|
| 13.216         | 17196333 | 49.994       | 193        |
| 14.700         | 17200271 | 50.006       | 249        |

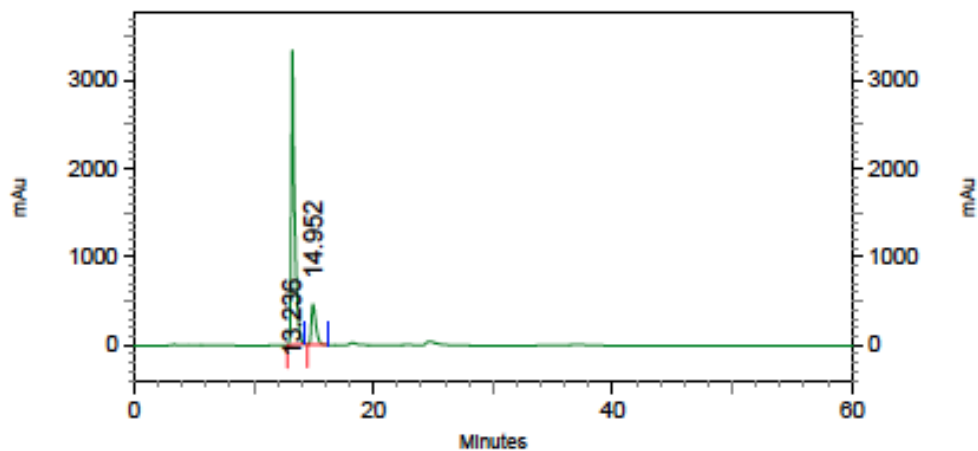

1: 260 nm, 4  
nm Results

| Retention Time | Area     | Area Percent | Lambda Max |
|----------------|----------|--------------|------------|
| 13.236         | 64271854 | 84.475       | 255        |
| 14.952         | 11811680 | 15.525       | 201        |

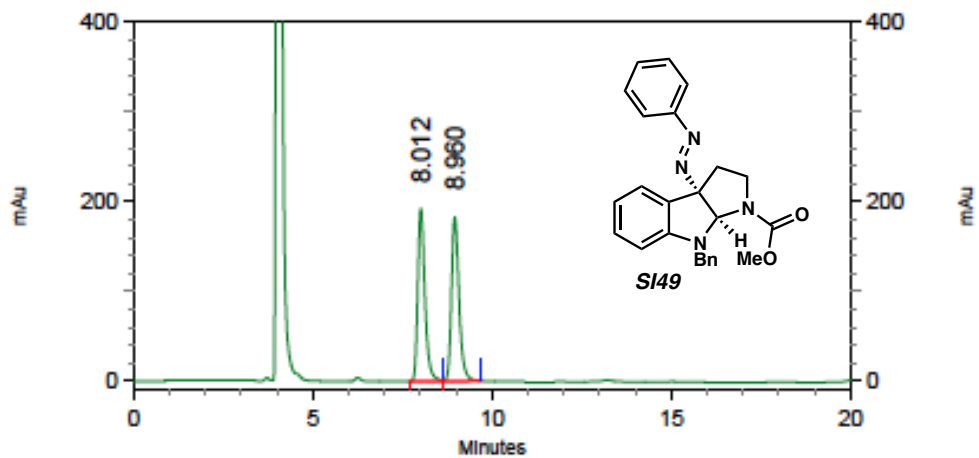

2: 260 nm, 4  
nm Results

| Pk # | Retention Time | Area    | Area Percent | Lambda Max |
|------|----------------|---------|--------------|------------|
| 1    | 8.012          | 2668090 | 49.807       | 207        |
| 2    | 8.960          | 2688785 | 50.193       | 207        |

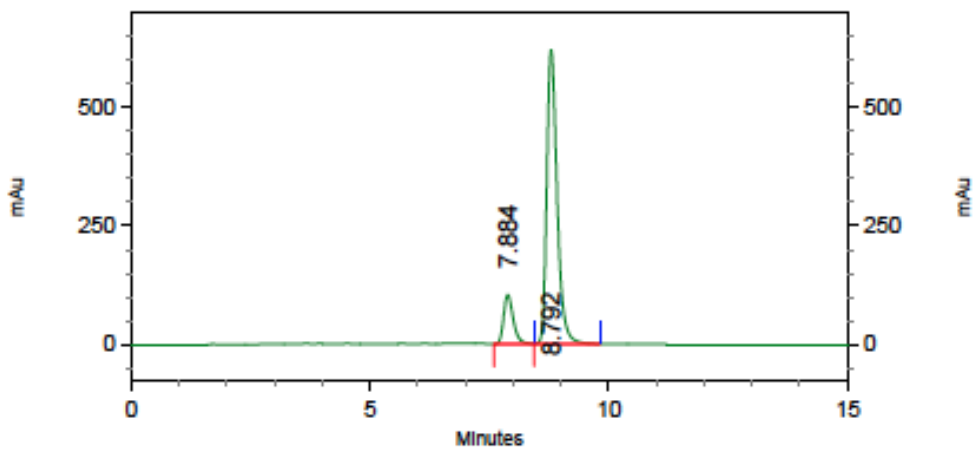

2: 260 nm, 4  
nm Results

| Pk # | Retention Time | Area    | Area Percent | Lambda Max |
|------|----------------|---------|--------------|------------|
| 1    | 7.884          | 1461730 | 13.546       | 207        |
| 2    | 8.792          | 9328984 | 86.454       | 207        |

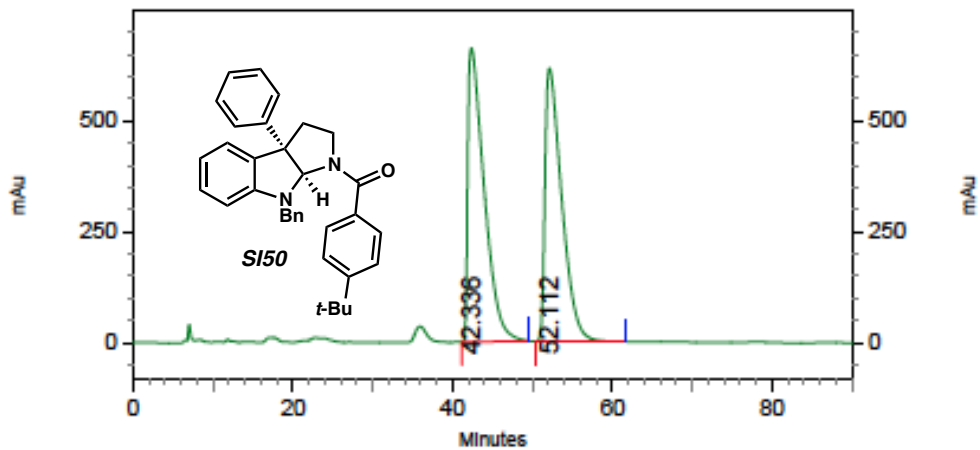

1: 220 nm, 4  
nm Results

| Retention Time | Area     | Area Percent | Lambda Max |
|----------------|----------|--------------|------------|
| 42.336         | 94401467 | 51.184       | 200        |
| 52.112         | 90033468 | 48.816       | 200        |

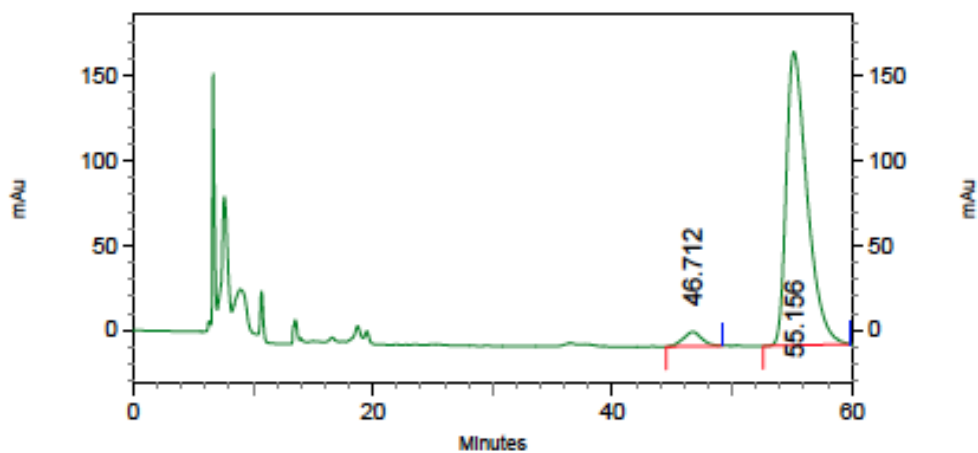

1: 220 nm, 4  
nm Results

| Retention Time | Area     | Area Percent | Lambda Max |
|----------------|----------|--------------|------------|
| 46.712         | 908713   | 4.151        | 653        |
| 55.156         | 20983573 | 95.849       | 200        |

#### IV. NMR Spectra

hps-6-173-SM.1.fid  
1H starting parameters (zg30)  
DRX-500 TBIC  
061212 CGC

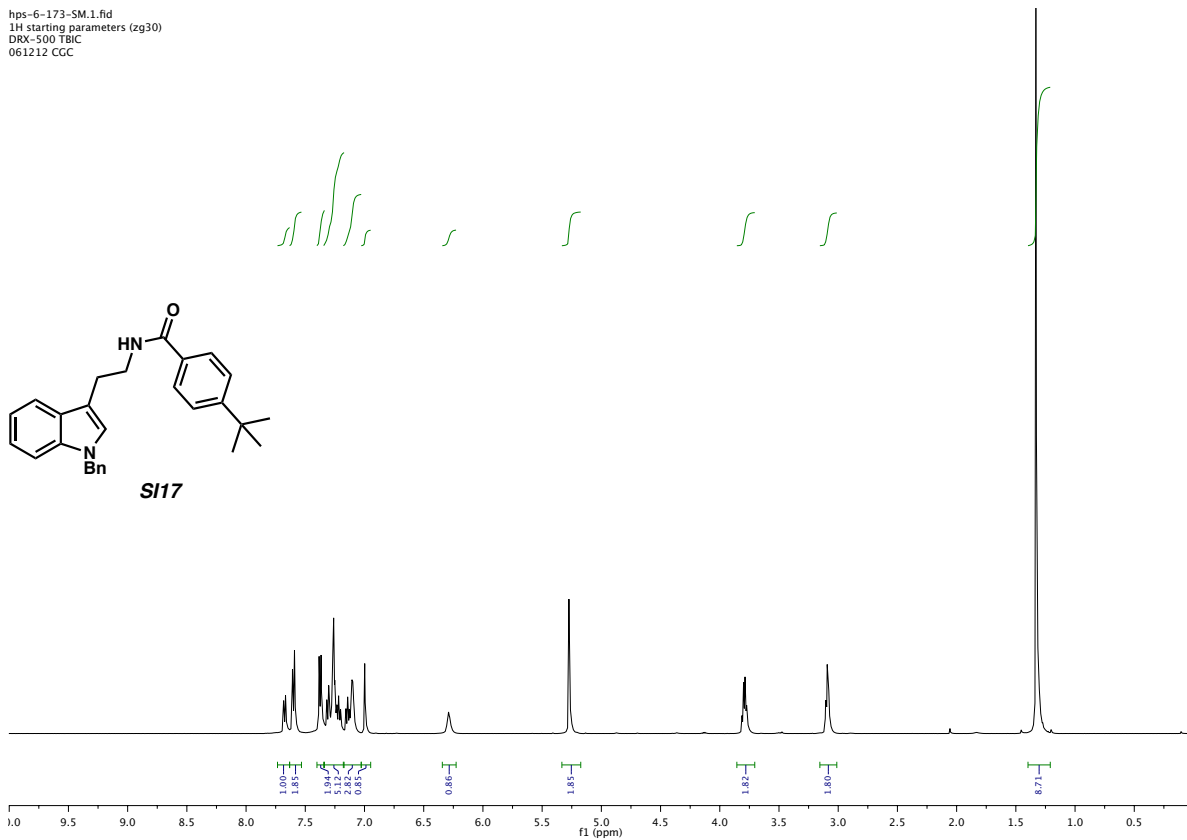

hps-6-173-SM.13.fid  
DRX-500 5mm Z80 probe 13C starting parameters. Rev 6/12/12 CGC  
With CPD proton decoupling. Use ns\*td0 scans

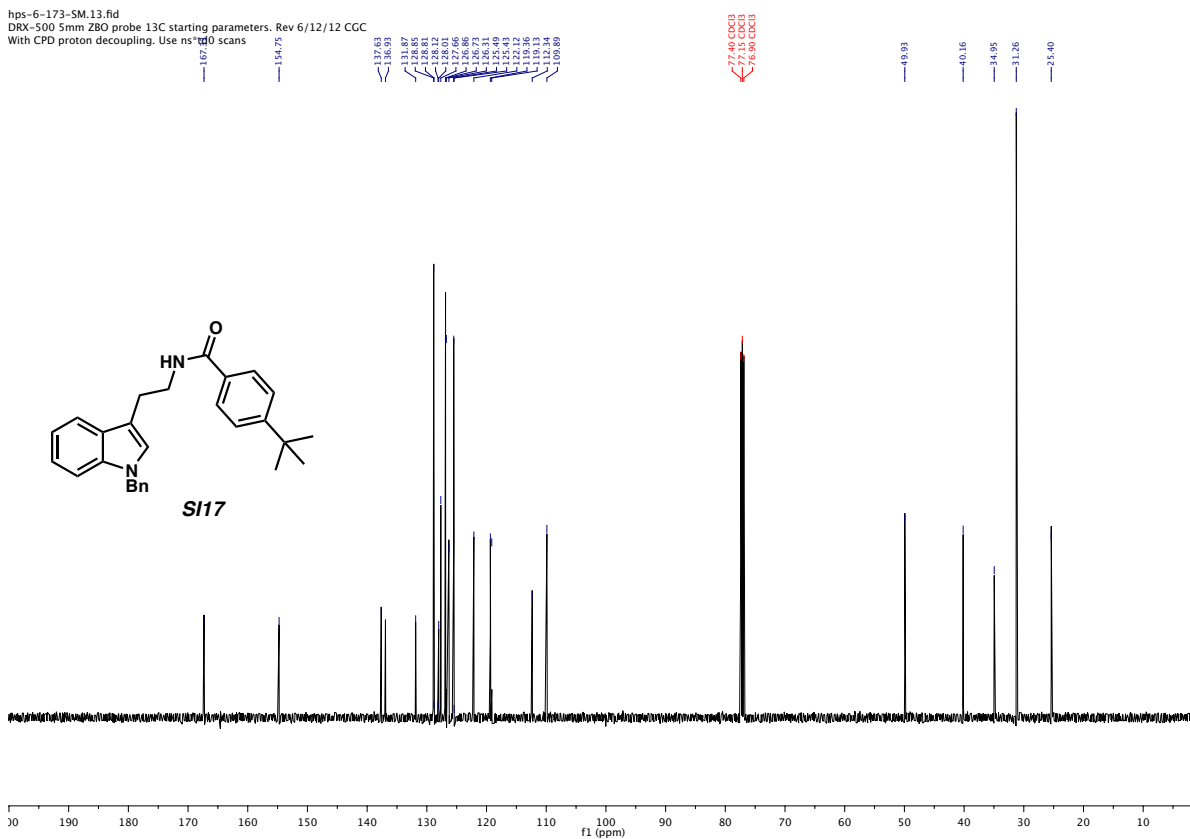









hps-6-fluorsubstrate.1.fid  
 1H starting parameters (zg30)  
 DRX-500 TBIC  
 061212 CGC

7.56  
7.559  
7.558  
7.538  
7.538  
7.537  
7.537  
7.536  
7.535  
7.527  
7.526  
7.525  
7.525  
7.525  
7.518  
7.517  
7.515  
7.507  
7.507  
7.506  
7.503  
6.894  
6.892  
6.892  
6.892  
6.890  
6.890  
6.821

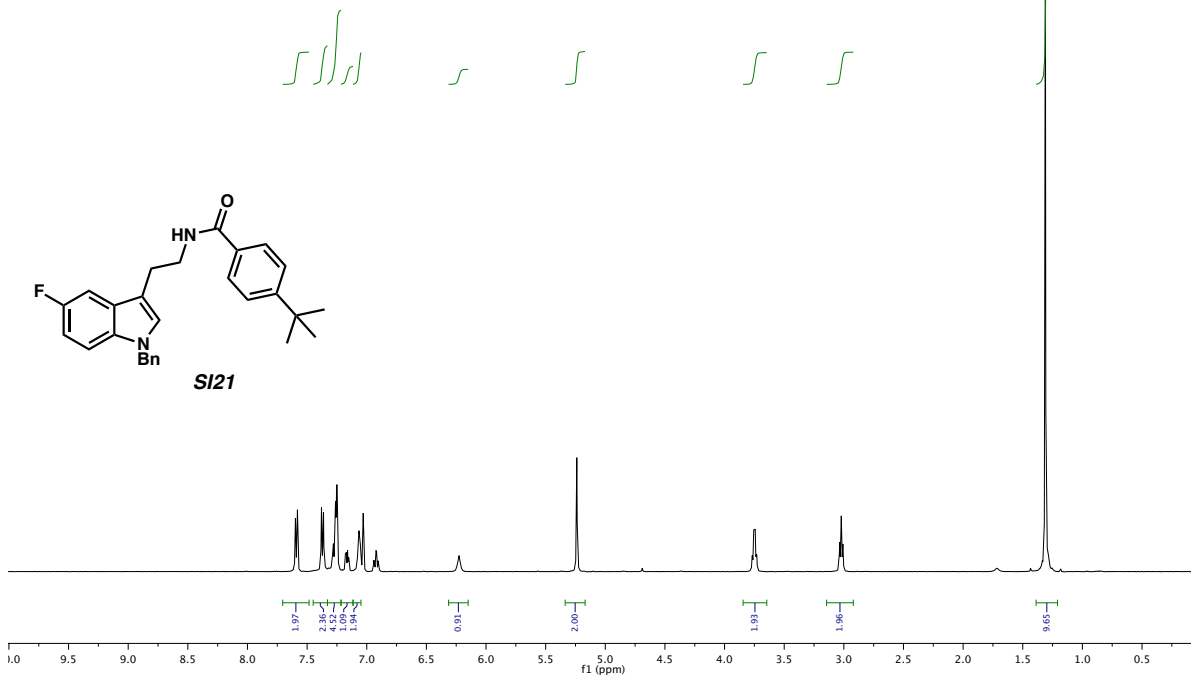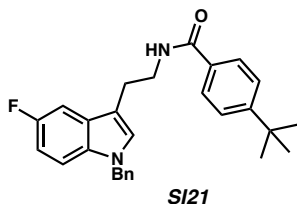

hps-6-fluorsubstrate.13.fid  
 DRX-500 5mm ZBO probe 13C starting parameters. Rev 6/12/12 CGC  
 With CPD proton decoupling. Use ns=80 scans

167.8  
155.15  
155.15  
137.73  
137.73  
132.10  
132.10  
128.62  
128.62  
128.55  
128.55  
128.08  
128.08  
126.99  
126.94  
125.83  
112.54  
110.94  
110.87  
110.86  
104.16

77.67 CDCl3  
77.16 CDCl3  
77.16 CDCl3

80.16  
40.32  
35.26  
31.54  
15.65

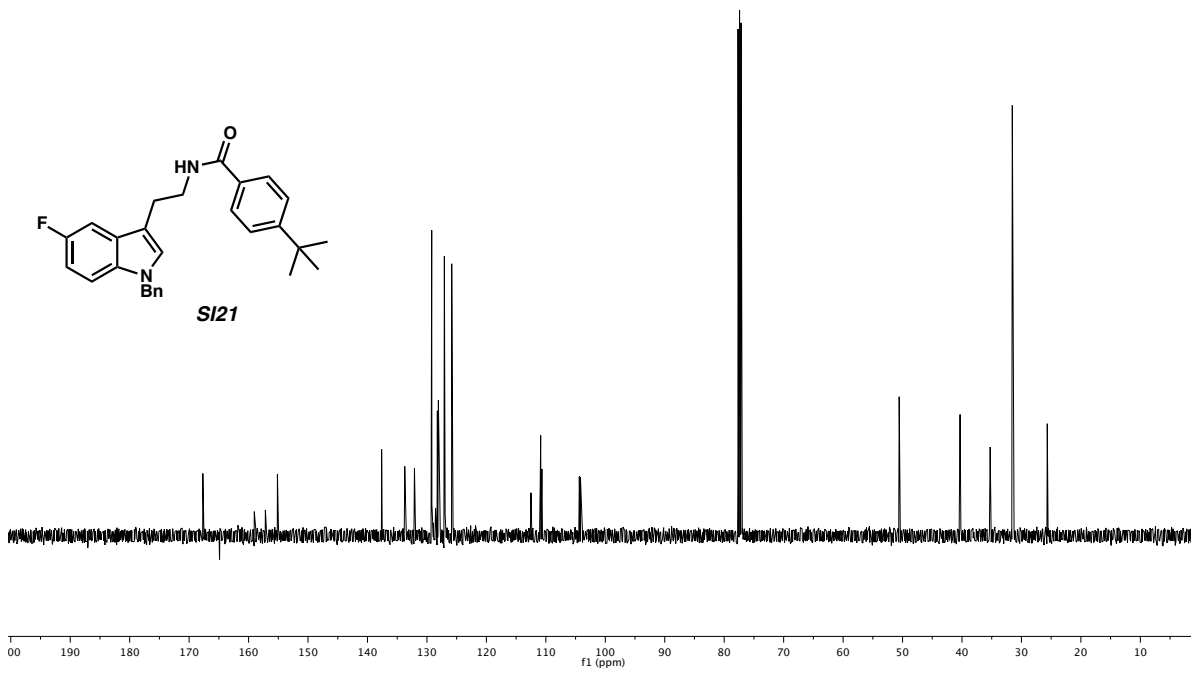



hps-6-methoxysubstrate.1.fid  
1H starting parameters (zg30)  
DRX-500 TBIC  
061212 CGC

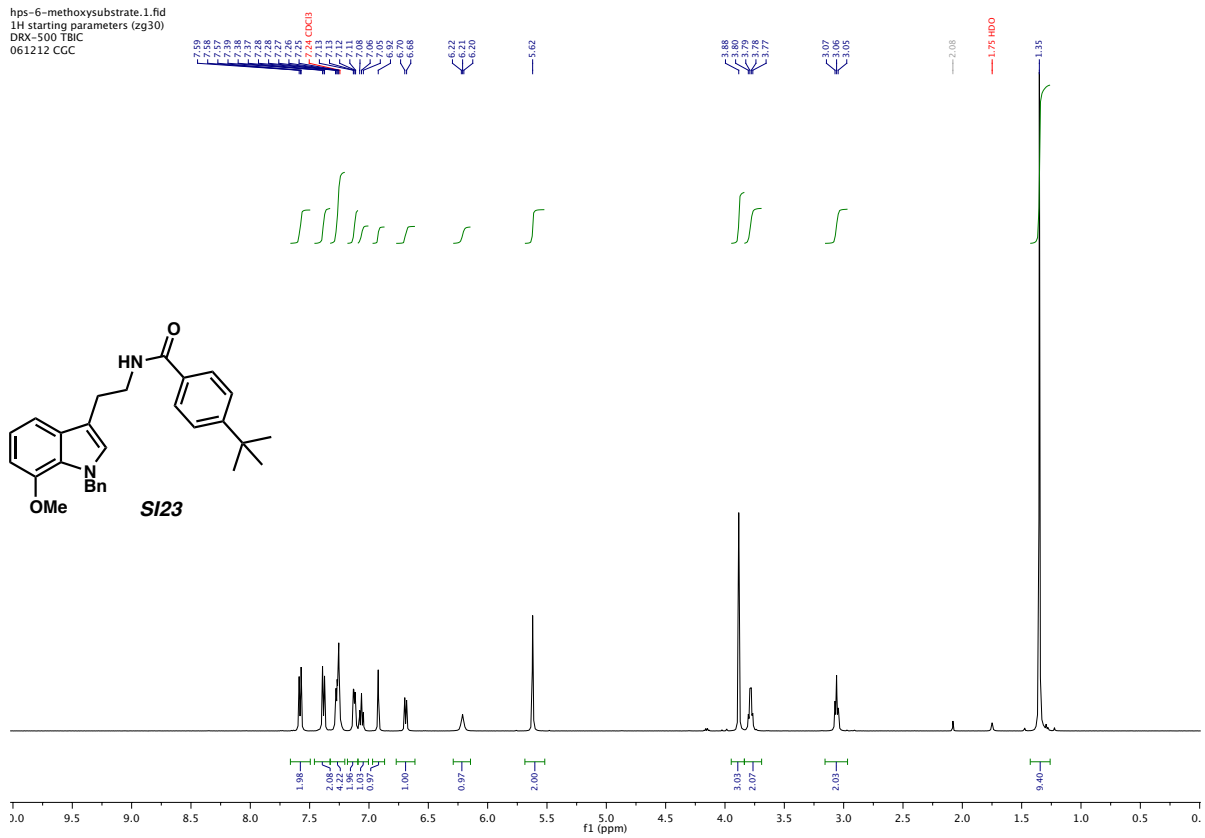

hps-6-methoxysubstrate.13.fid  
DRX-500 5mm ZBO probe 13C starting parameters. Rev 6/12/12 CGC  
With CPD proton decoupling. Use ns 60 scans

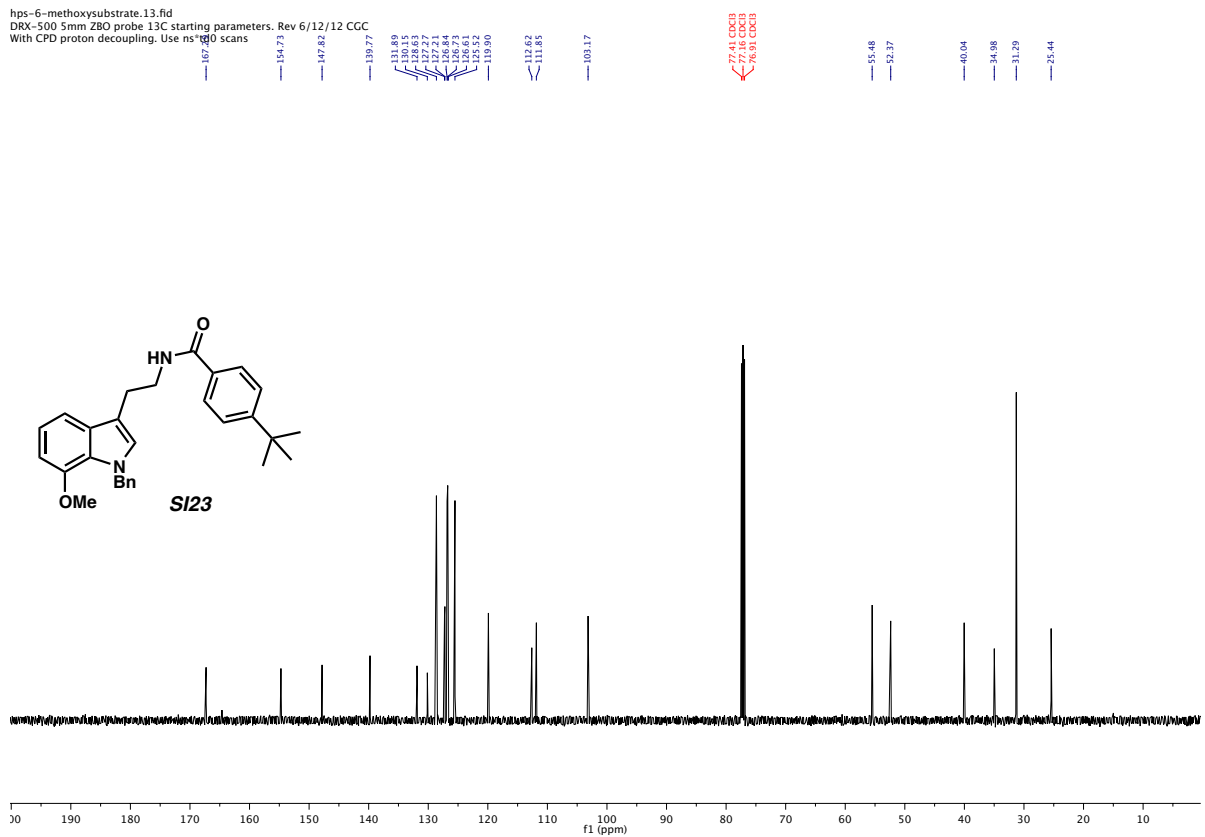









hps-6-183-3.1.fid  
1H starting parameters (zg30)  
DRX-500 TBIC  
061212 CGC

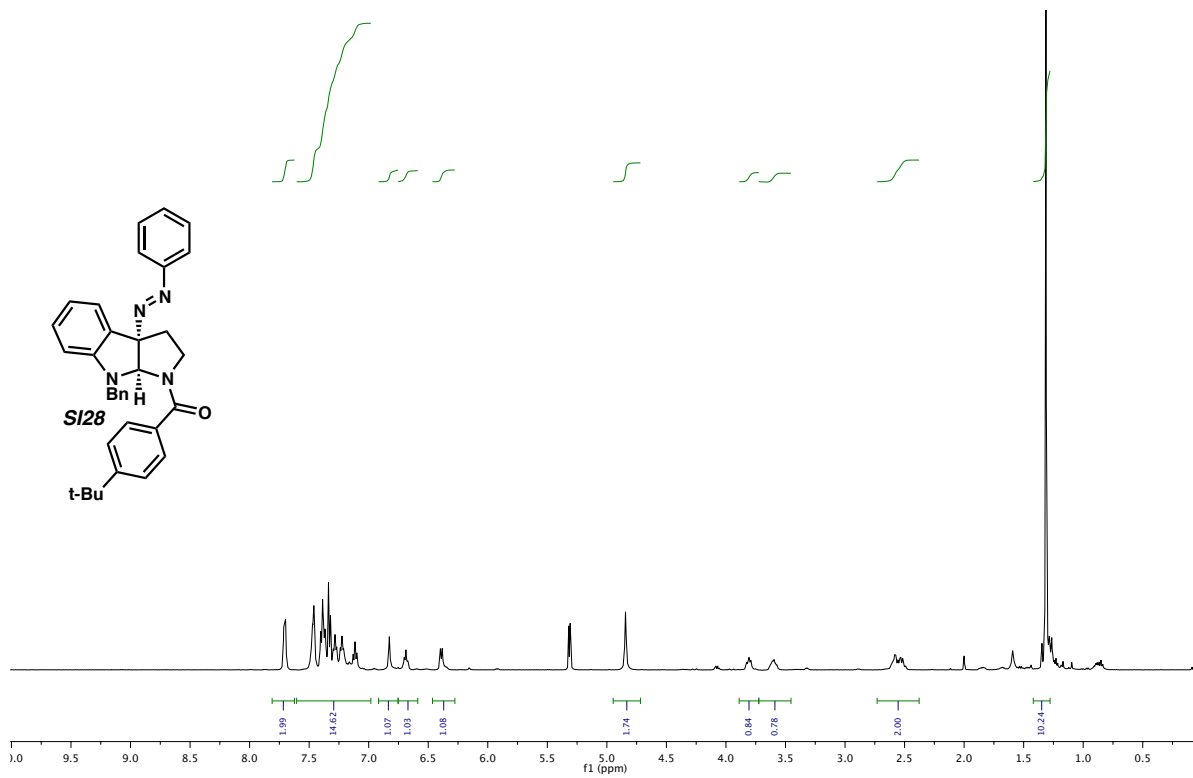

hps-6-183-3.13.fid  
DRX-500 Smm Z80 probe 13C starting parameters  
With CPD proton decoupling. Use ms\*td0 scans

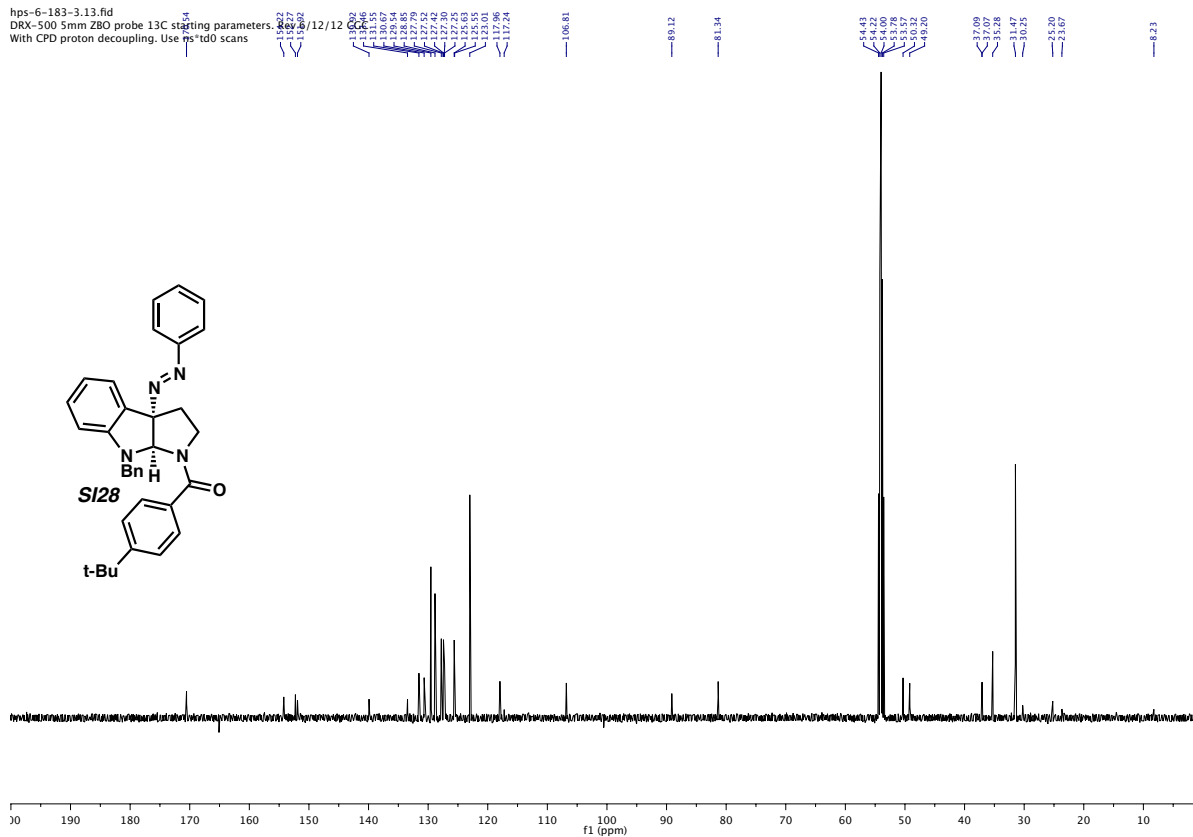

hps-6-183-2.1.fid  
 1H starting parameters (zg30)  
 DRX-500 TBIC  
 061212 CCG

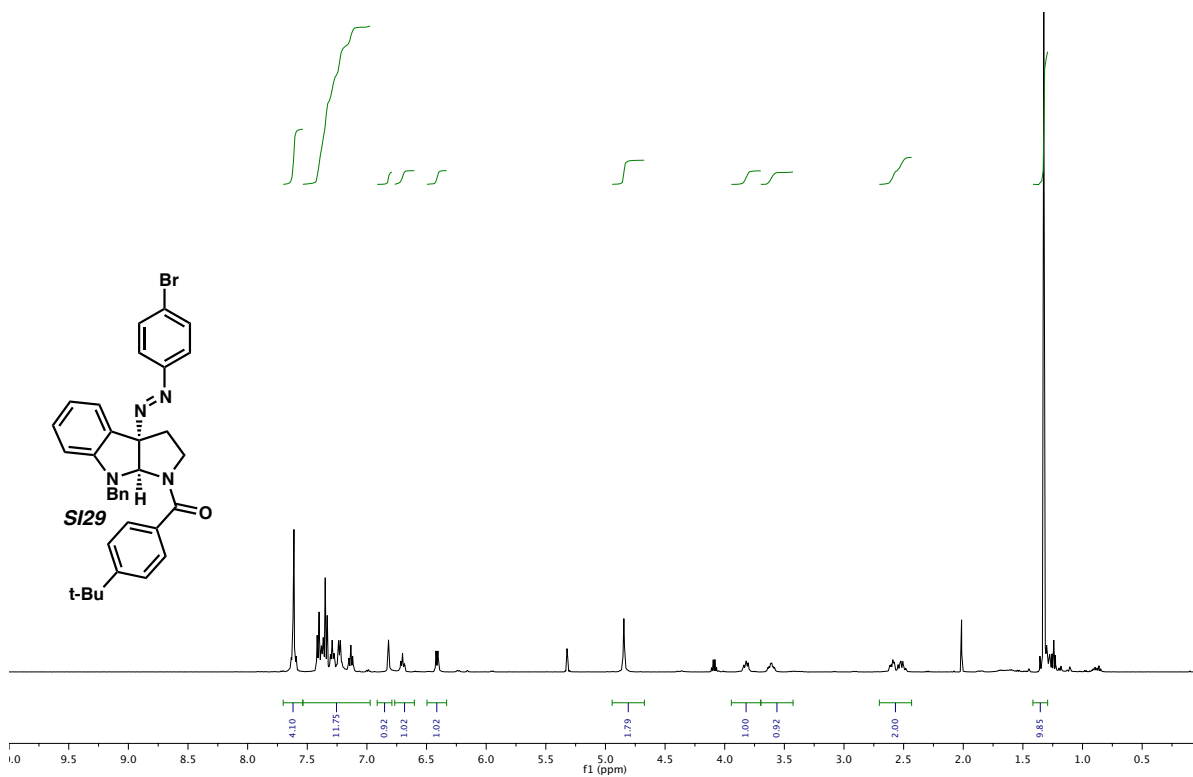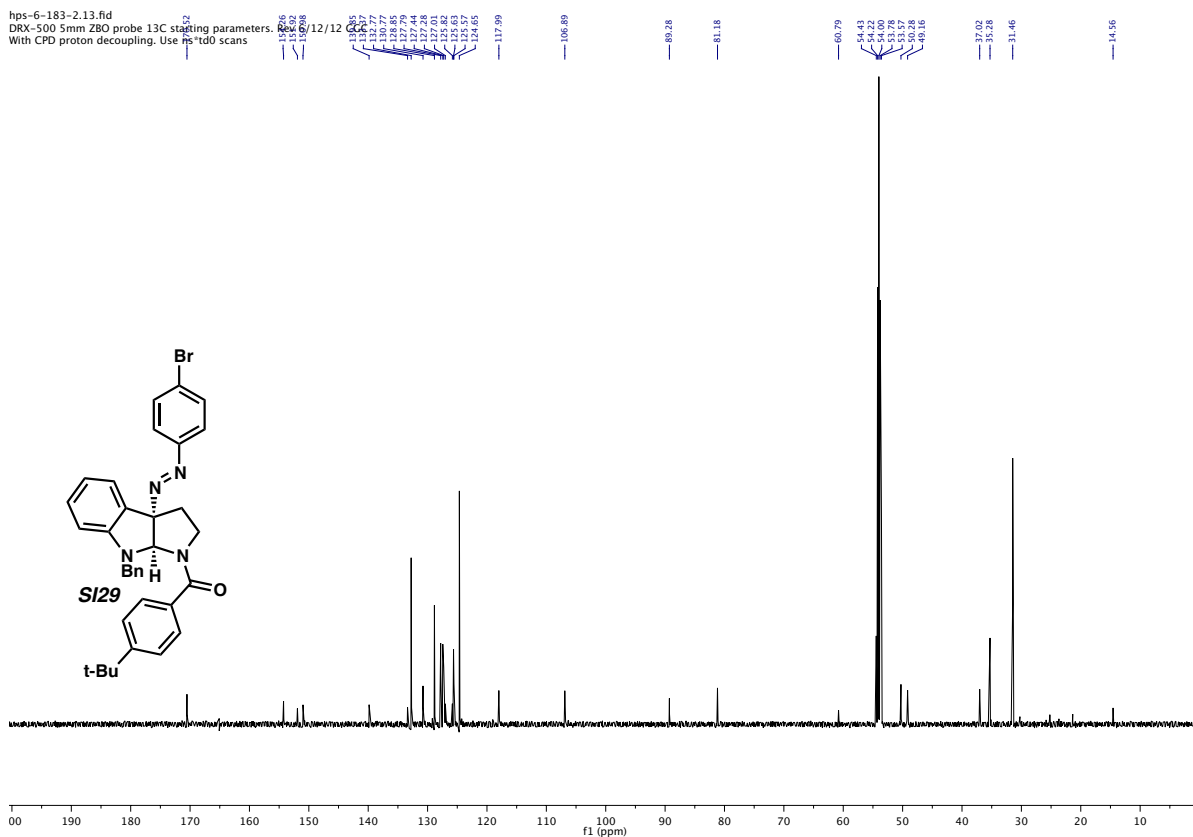

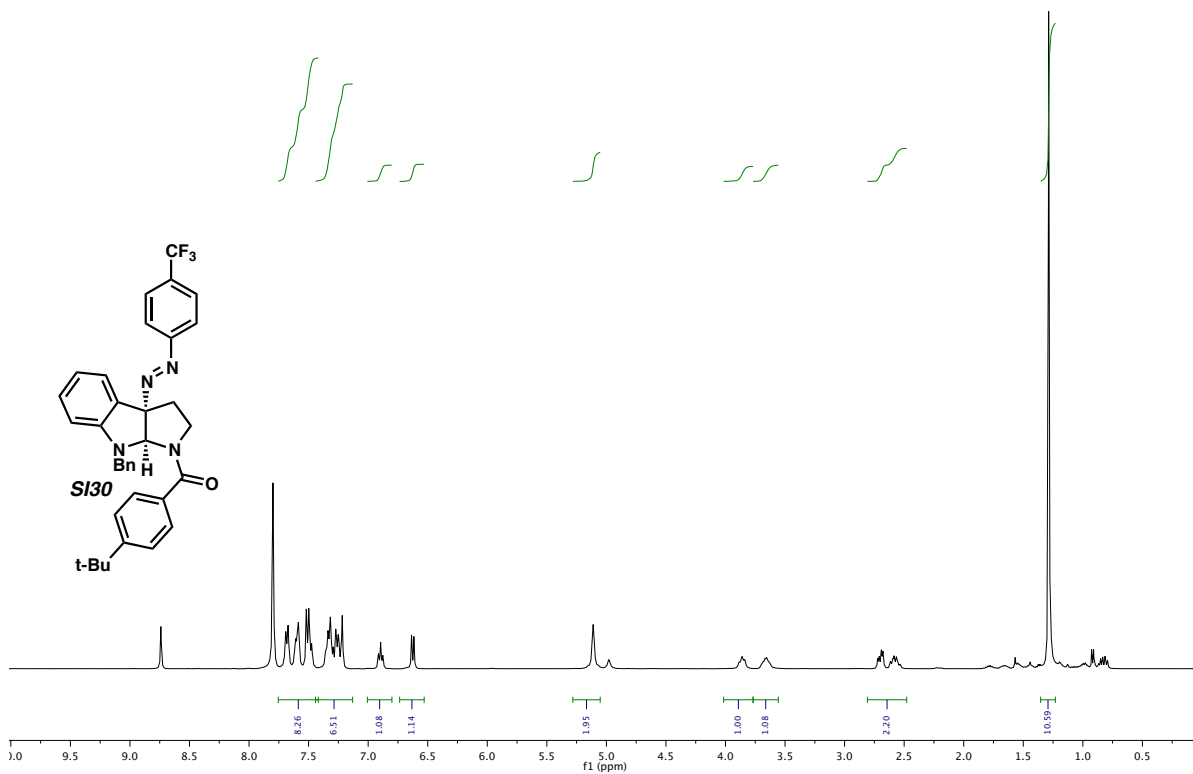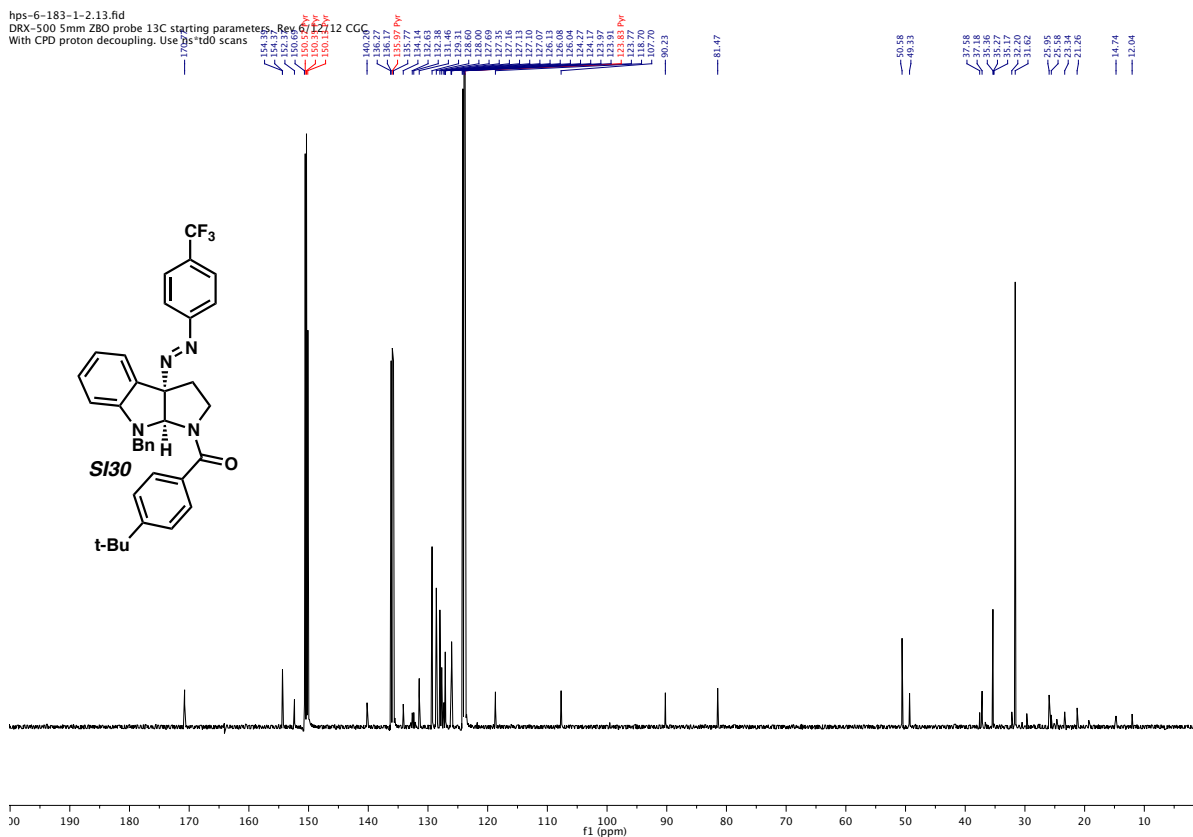



SR-I-38b.1.fid  
 AV-300 Dual C-H probe proton starting parameters 7/23/03 RN.

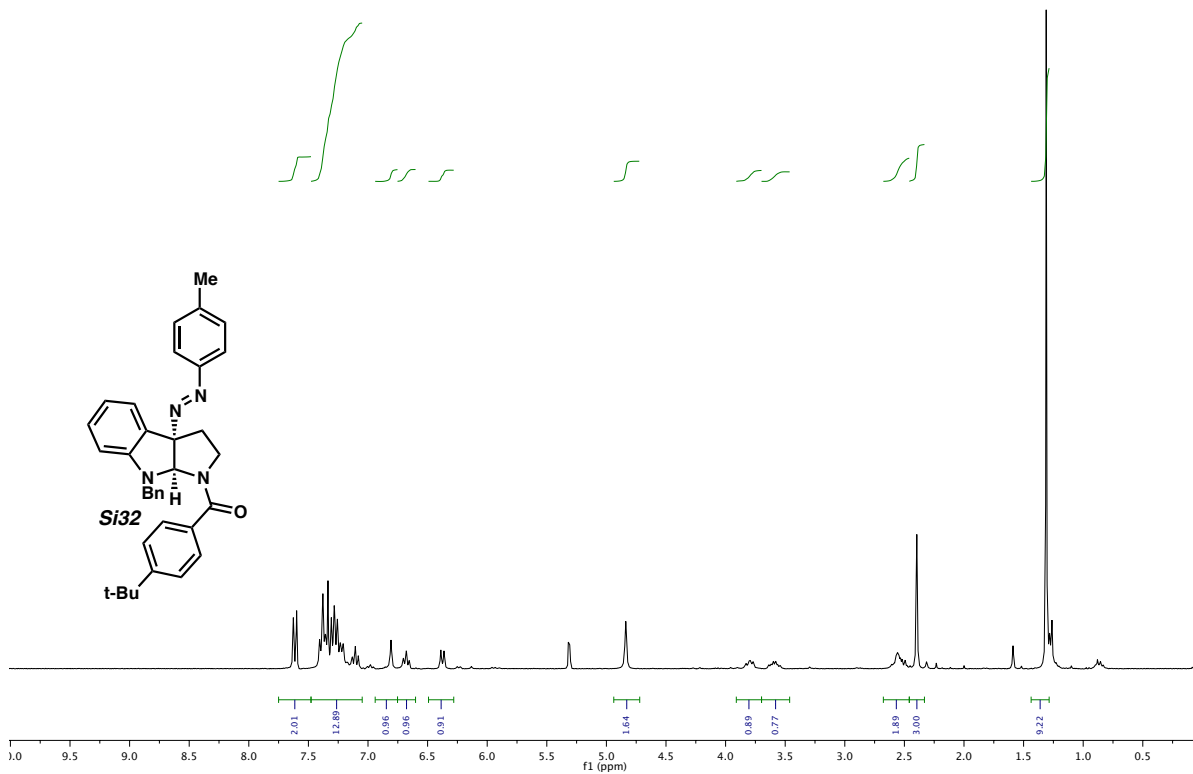

SR-I-38b.3.fid  
 DRX-500 5mm Z80 probe 13C starting parameters. Rev 6/12/12 CGC  
 With CPD proton decoupling. Use g\*td0 scans

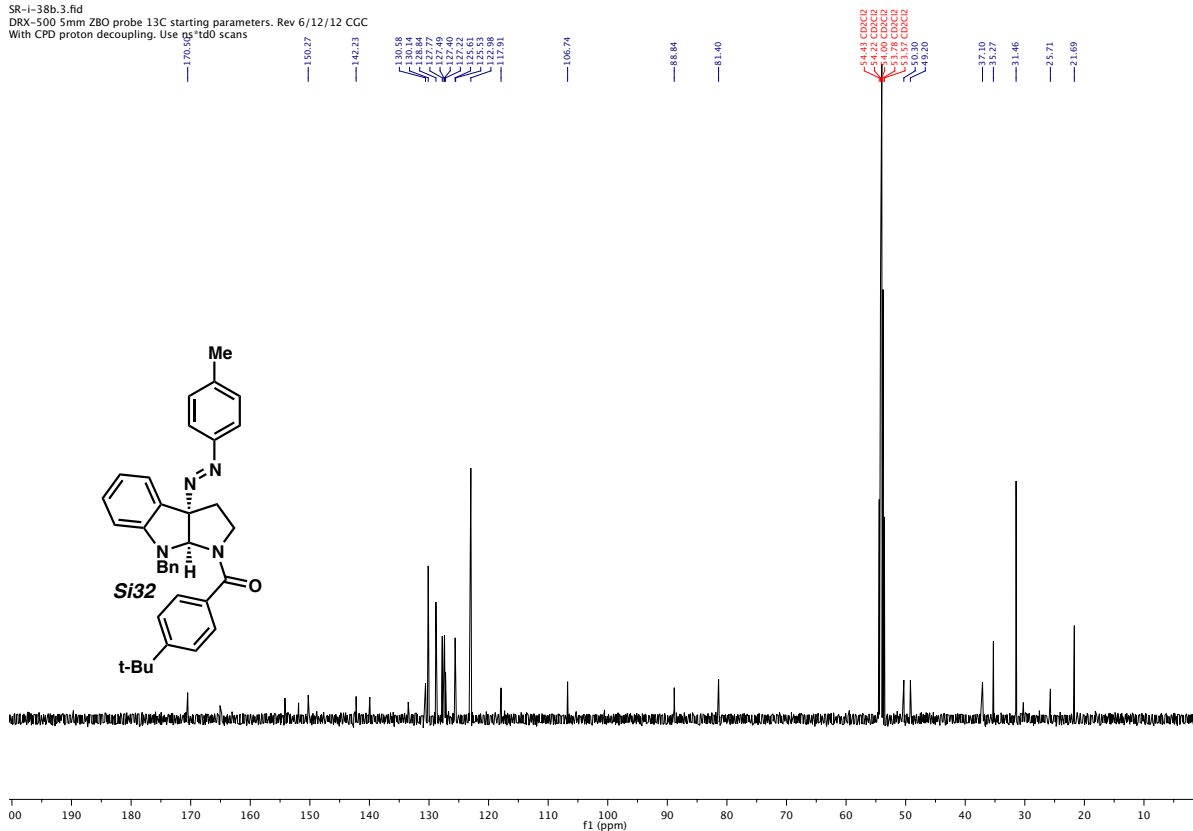

hps-6-173-2-2.1.fid  
1H starting parameters (zg30)  
DRX-500 TBIC  
061212 CGC

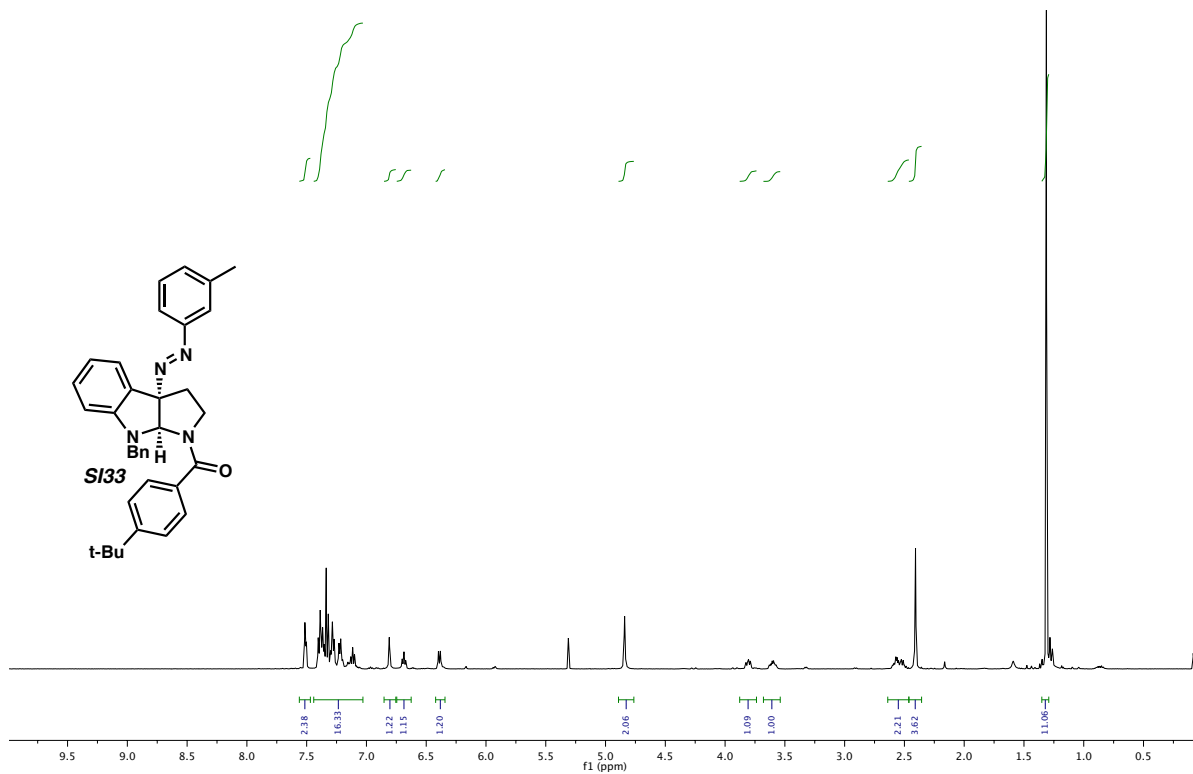

hps-6-173-2-2.13.fid  
DRX-500 5mm ZBO probe 13C starting parameters  
With CPD proton decoupling. Use ms\*td0 scans

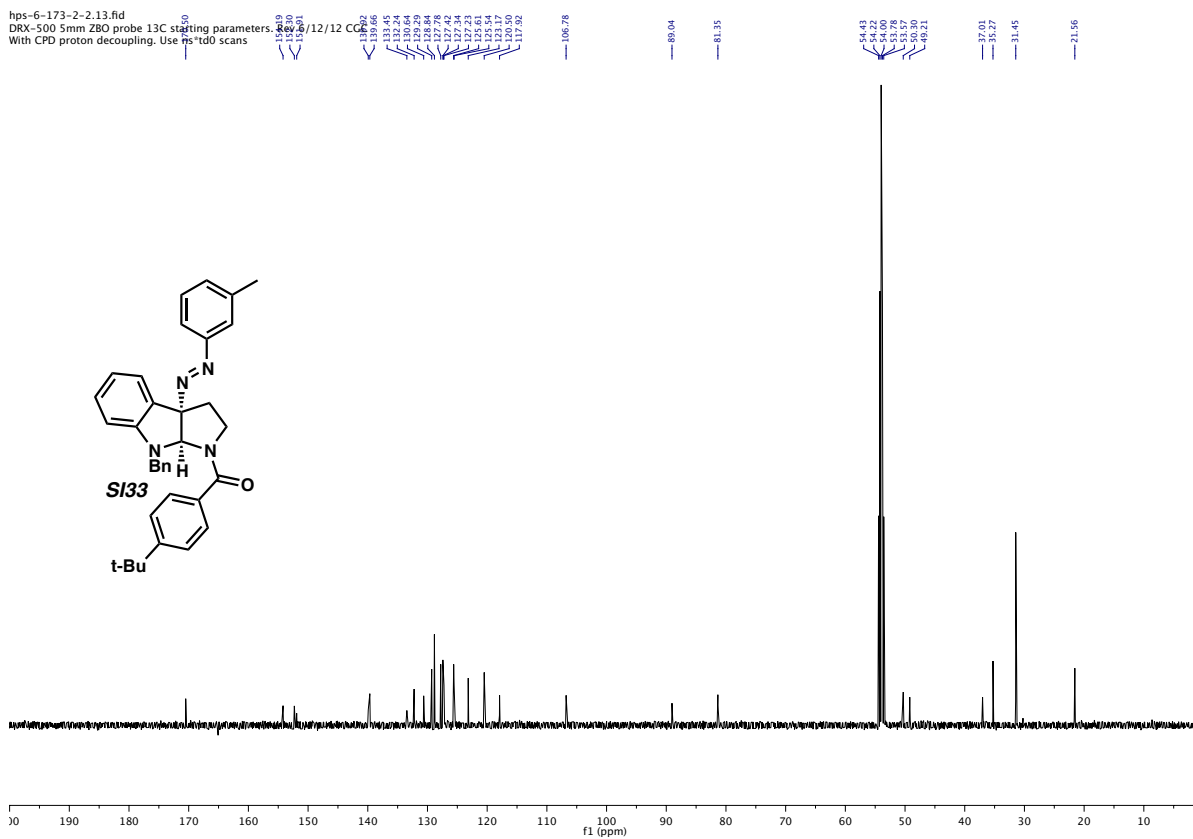

hps-6-173-3.1.fid  
1H starting parameters (zg30)  
DRX-500 TBIC  
061212 CCG

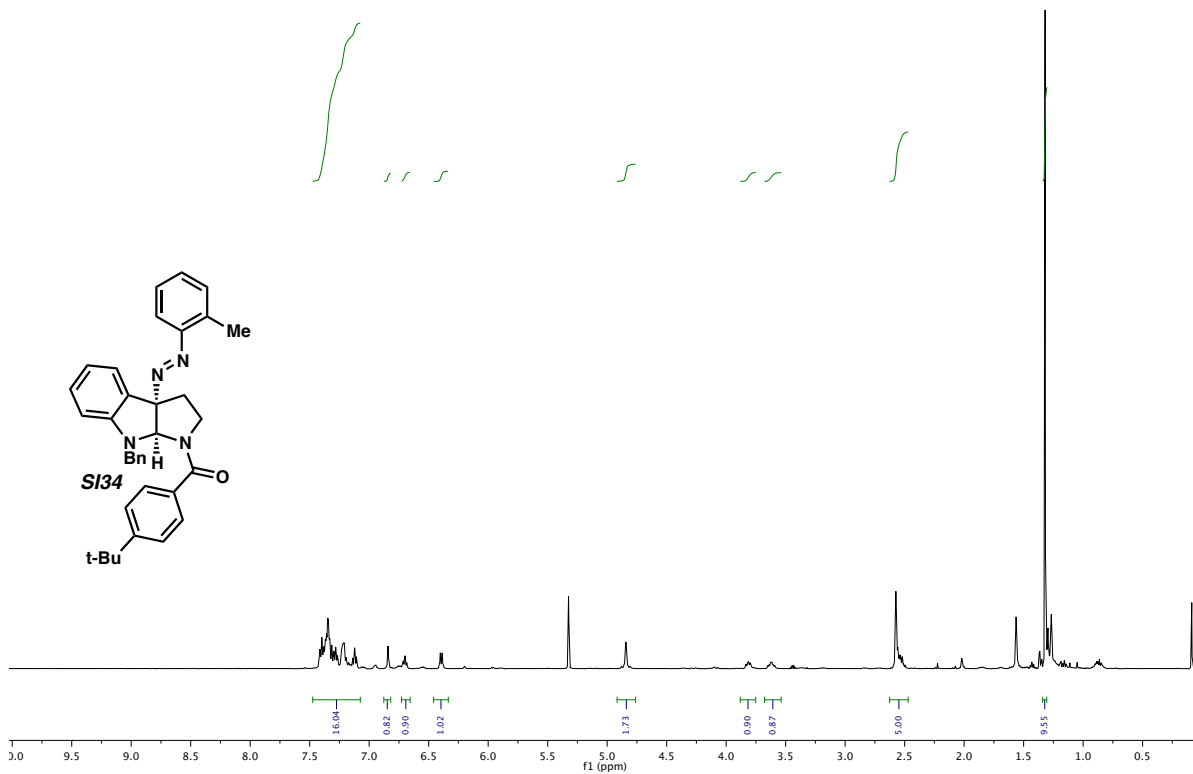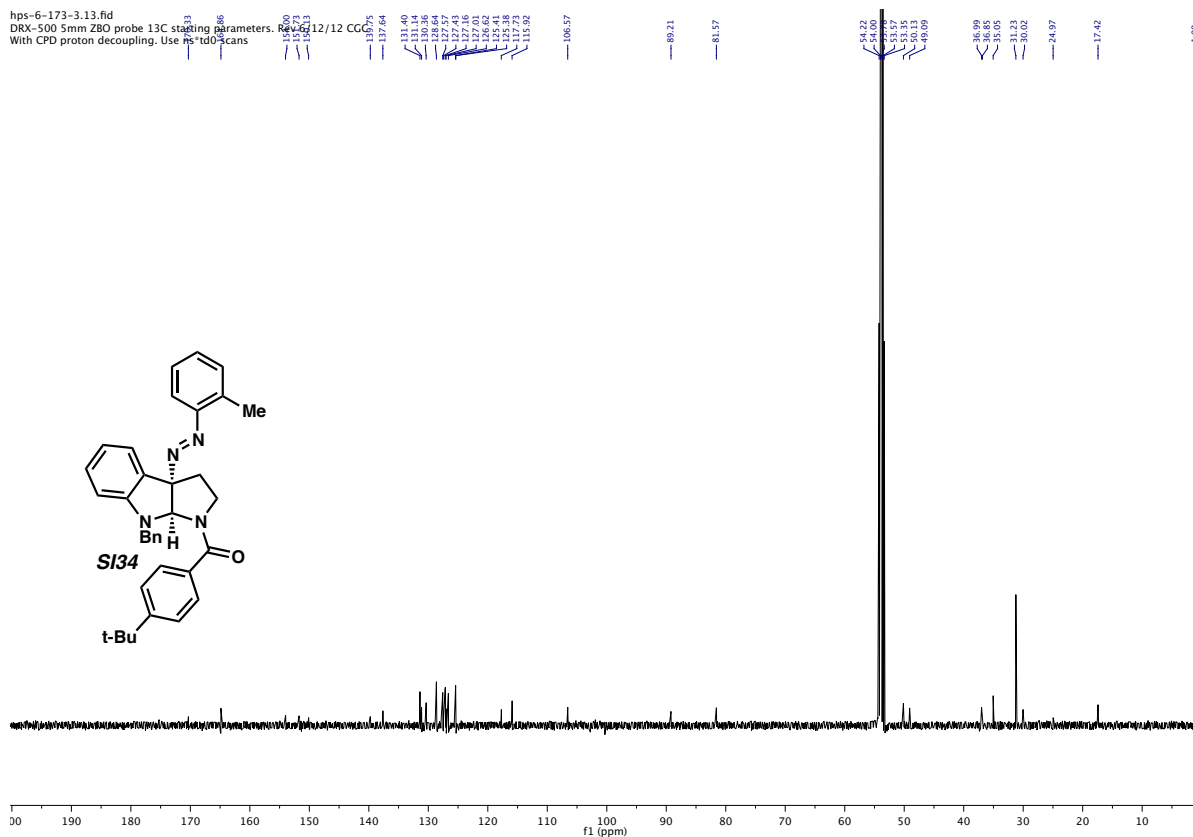

SR-i-38a.1.fid  
 1H starting parameters (zg30)  
 DRX-500 TBIC  
 061212 CCG

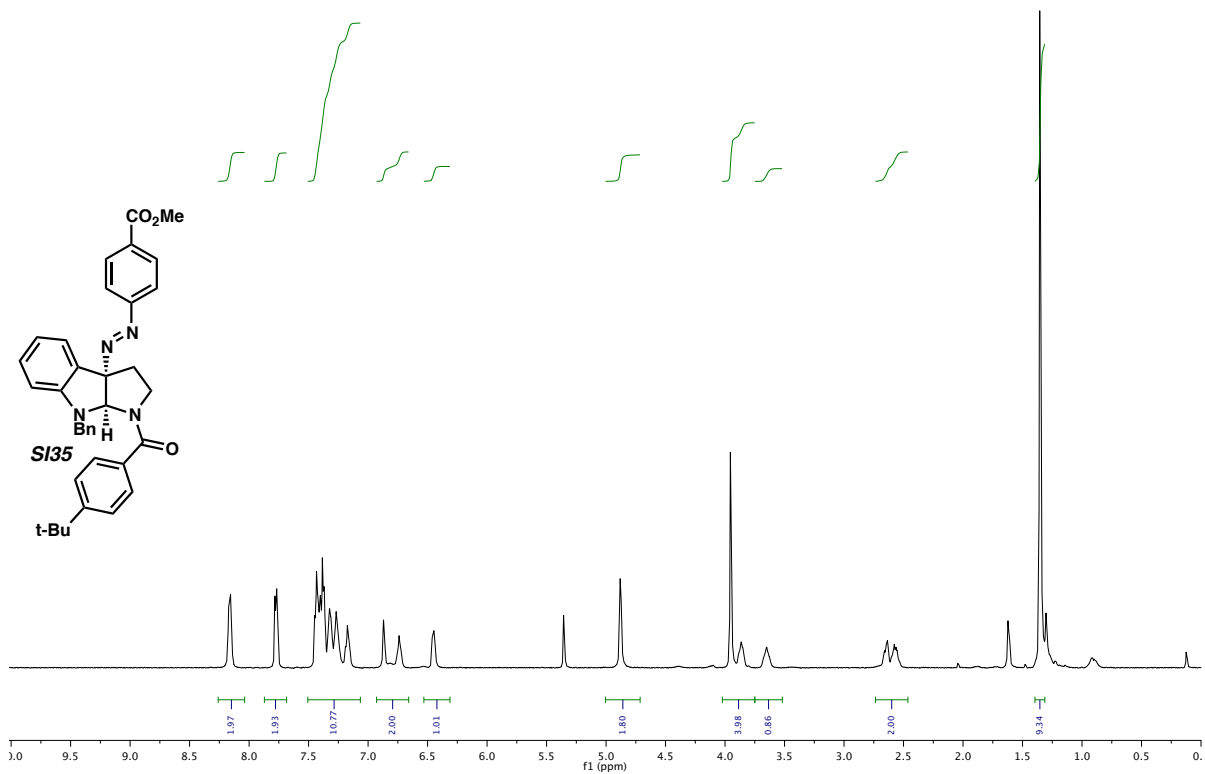

SR-i-38a.2.fid  
 DRX-500 5mm ZBO probe 13C starting parameters (zgpg30)  
 With CPD proton decoupling. Use ns140 scans

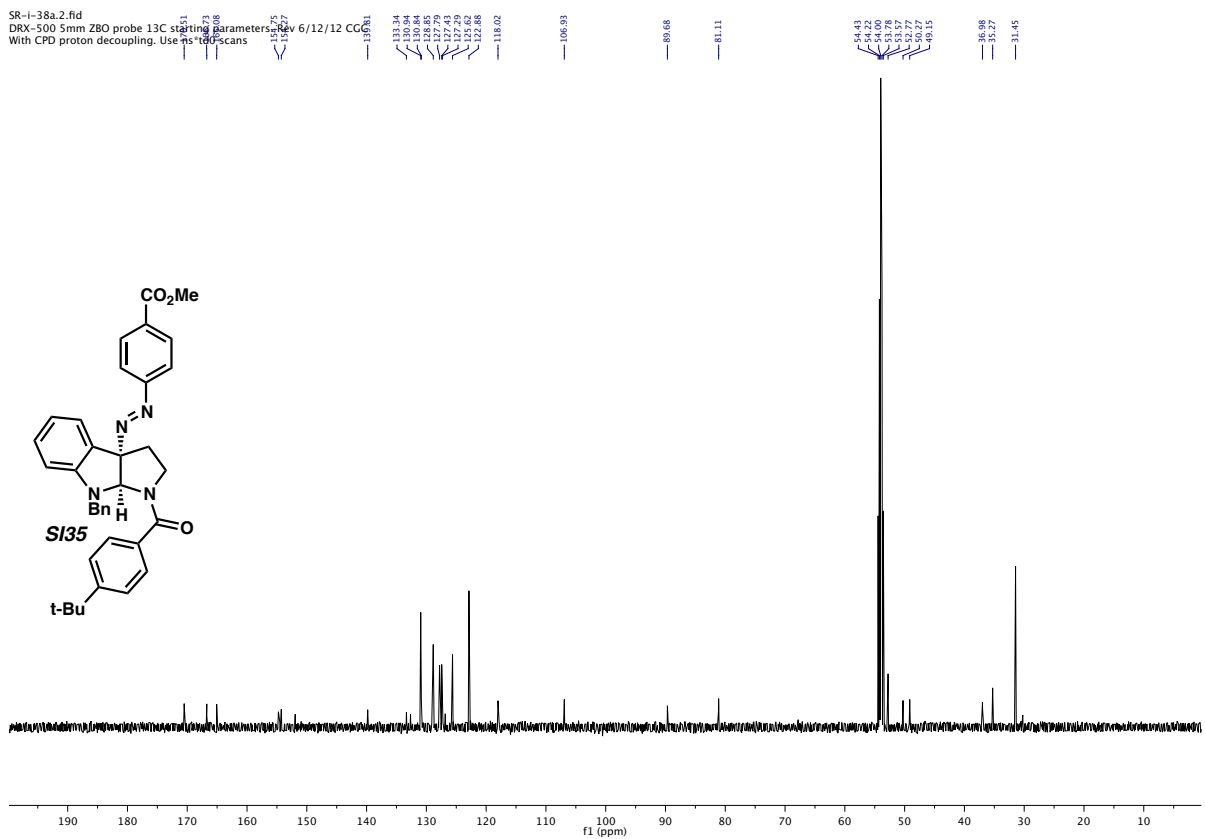



hps-6-176-1.13.fid  
DRX-500 5mm Z80 probe 13C starting parameters Rev 6/12/12 CCG  
With CPD proton decoupling. Use ms\*td0 scans

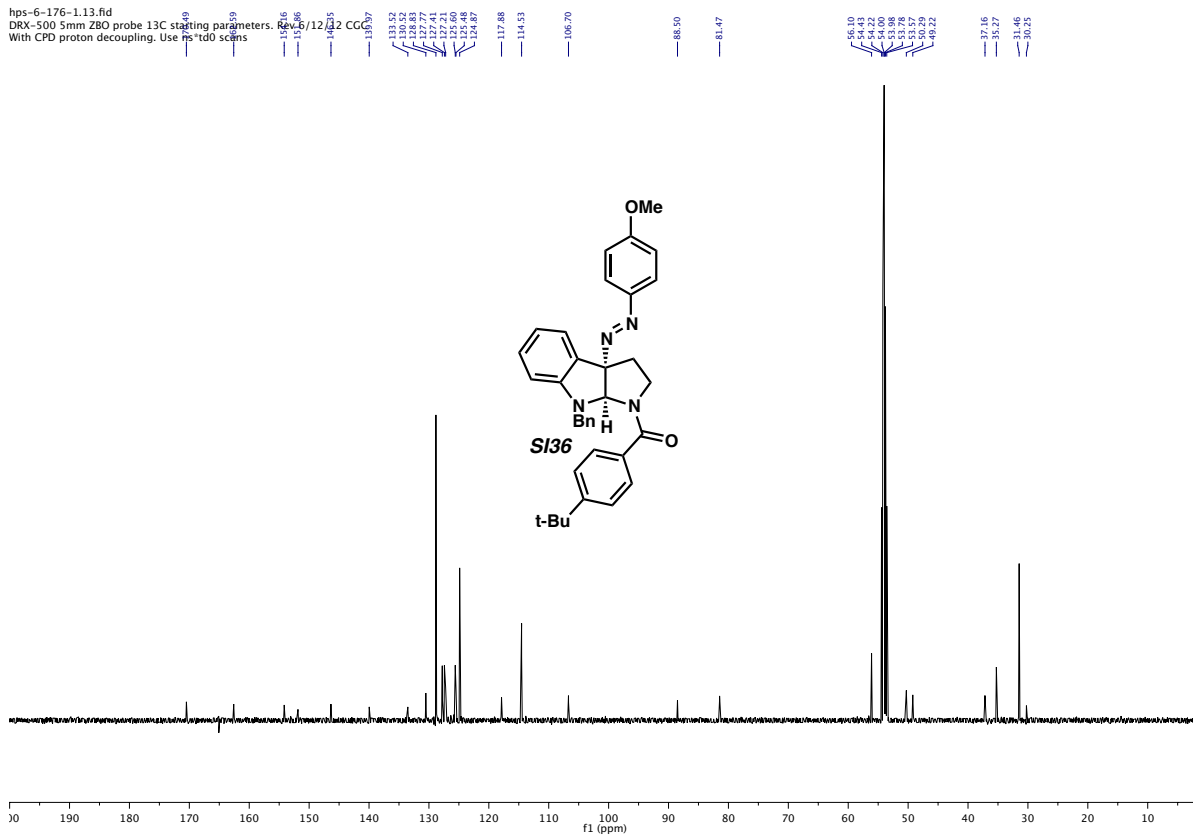

hps-6-176-1.1.fid  
1H starting parameters (zg30)  
DRX-500 TBIC  
061212 CCG

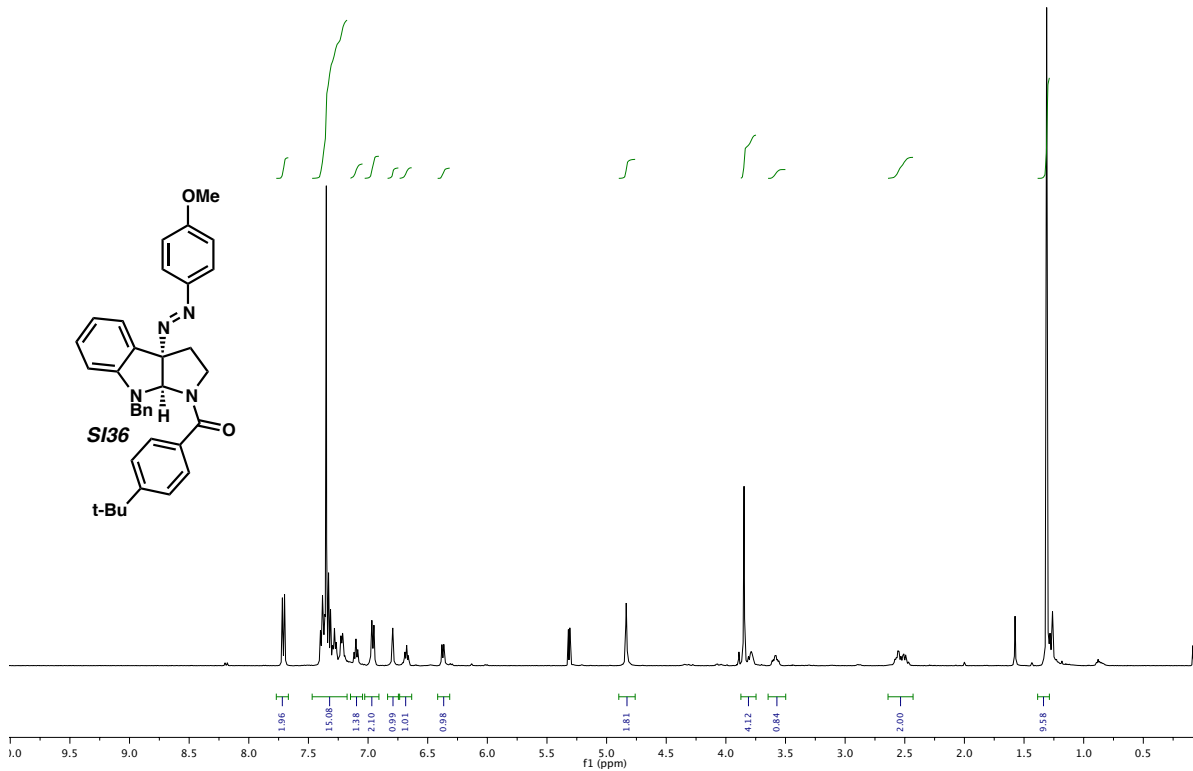





hmn-ii-123e.1.fid  
 1H starting parameters (zg30)  
 DRX-500 TBIC  
 061212 CGC

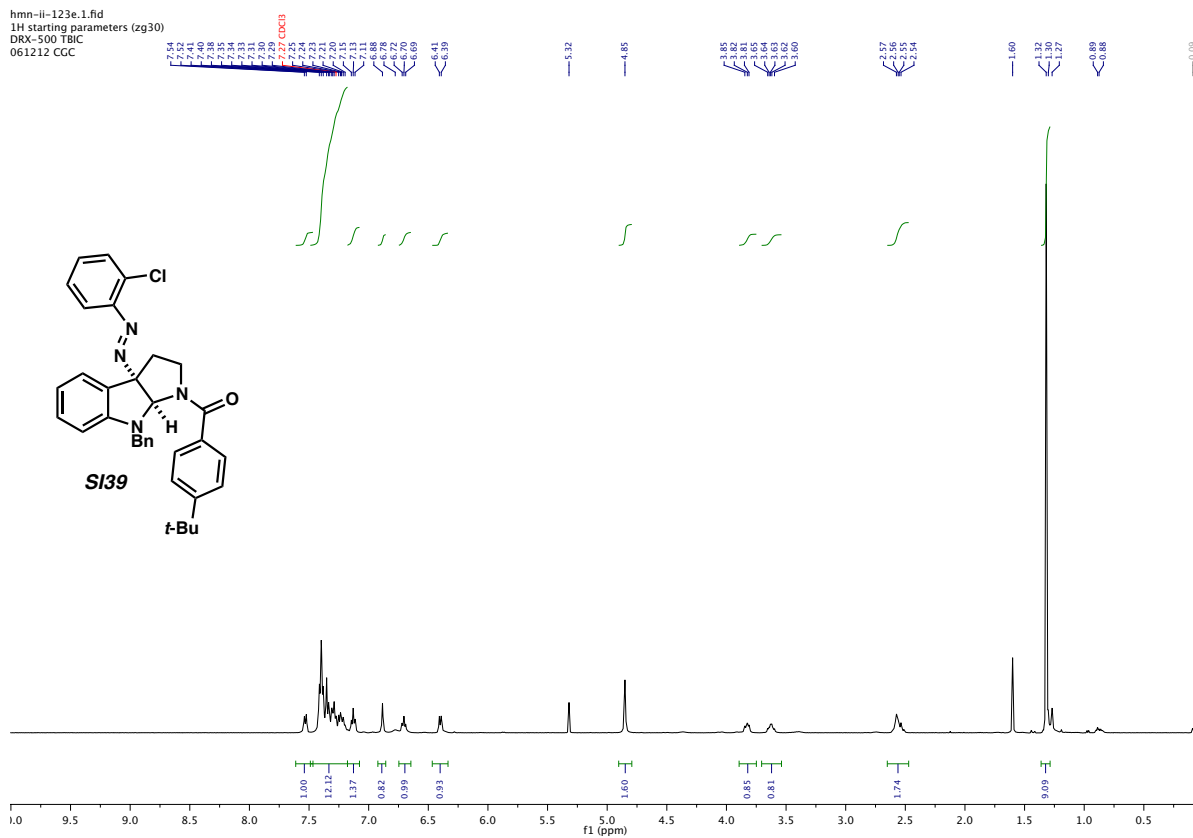

hmn-ii-123e.2.fid  
 DRX-500 5mm ZBO probe 13C starting parameters (zgpg30)  
 With CPD proton decoupling. Use ms\*td0 scans

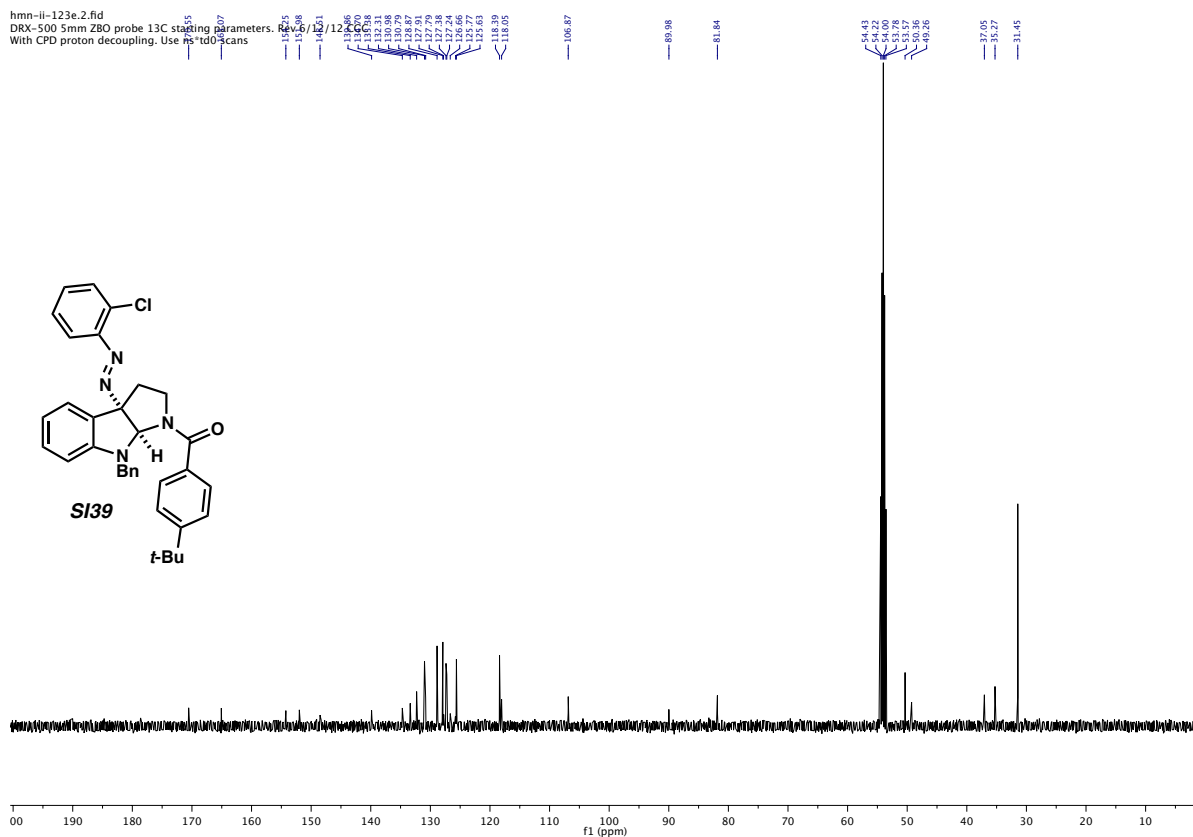

HMN-II-123d.1.fid  
 1H starting parameters (zg30)  
 DRX-500 TBIC  
 061212 CGC

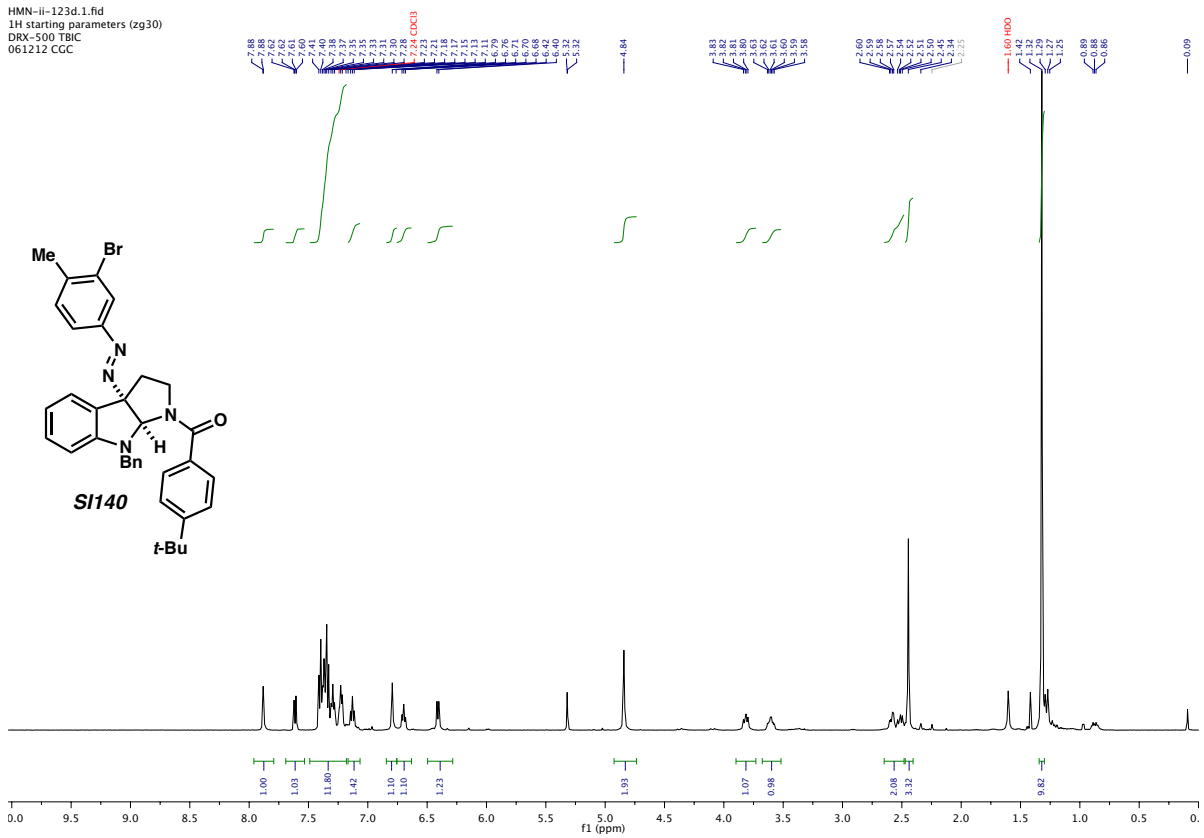

HMN-II-123d.2.fid  
 DRX-500 5mm Z80 probe 13C starting parameters (zgpg30)  
 With CPD proton decoupling. Use ns\*td0 scans

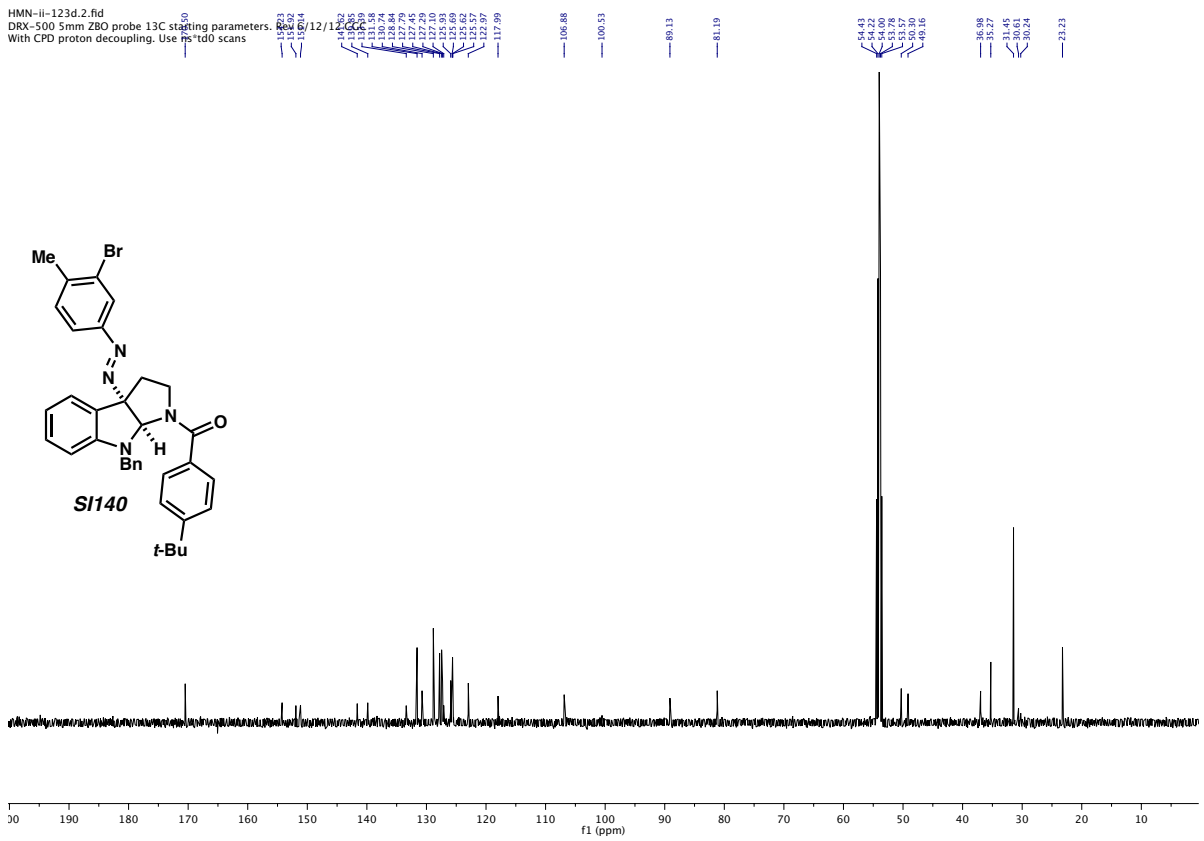

HMN-II-119a.1.fid  
 DRX-500 5mm Z80 probe 13C starting parameters. Rev 6/12/12 CGC  
 With CPD proton decoupling. Use ns\*td0 scans

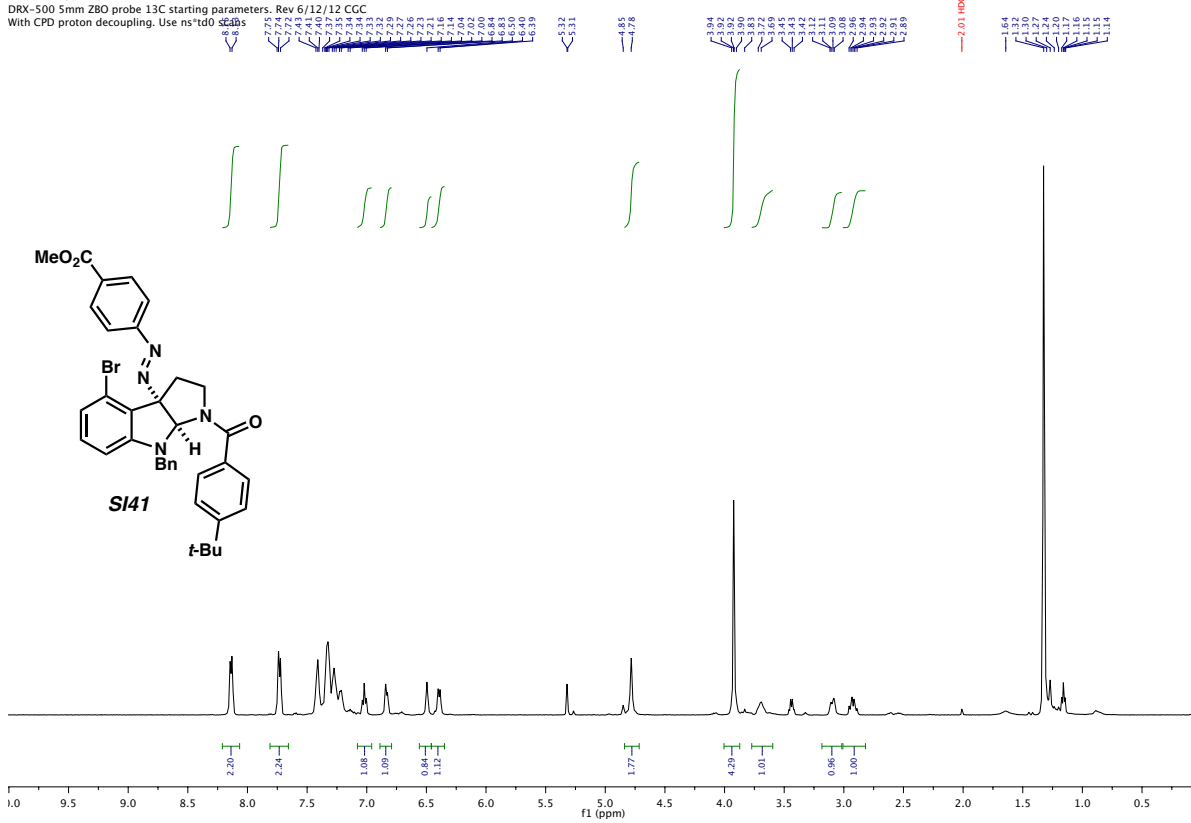

HMN-II-119a.2.fid  
 DRX-500 5mm Z80 probe 13C starting parameters. Rev 6/12/12 CGC  
 With CPD proton decoupling. Use ns\*td0 scans

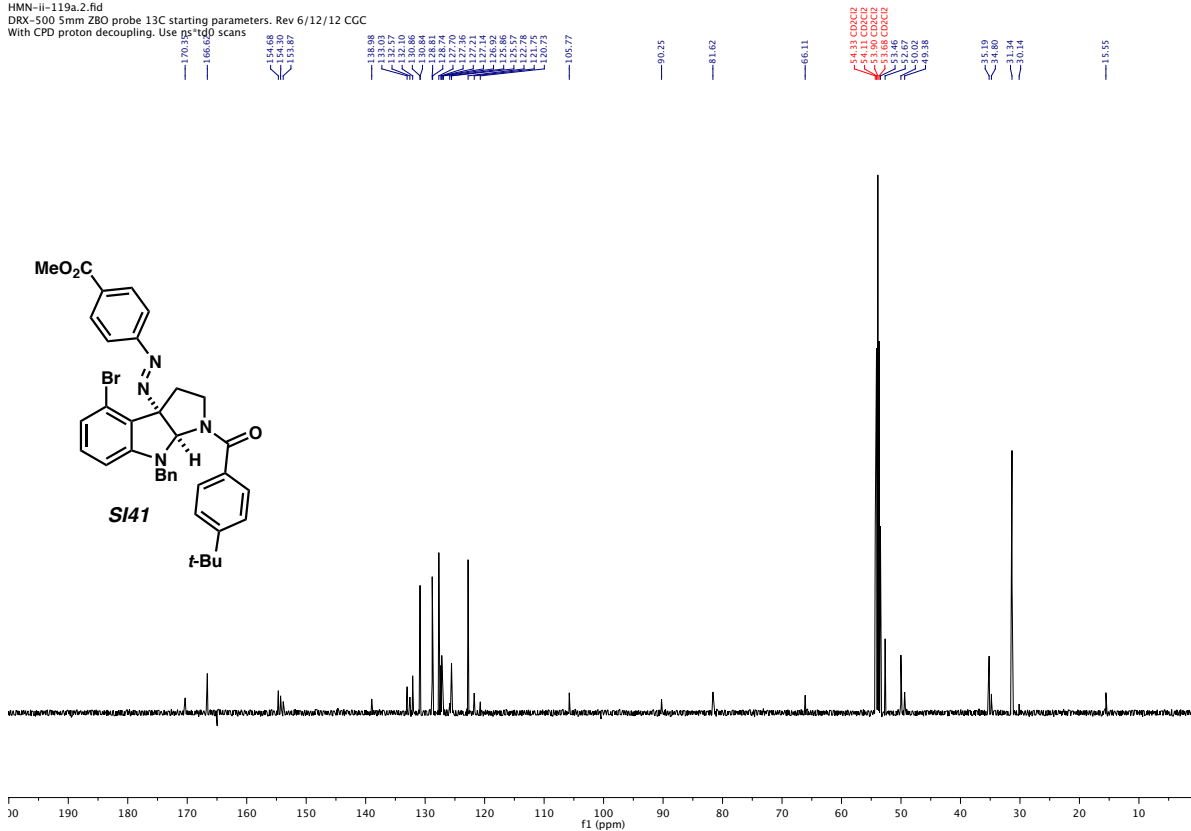

hmn-ii-161b.1.fid  
 DRX-500 5mm Z80 probe 13C staging parameters Rev 67271320  
 With CPD proton decoupling

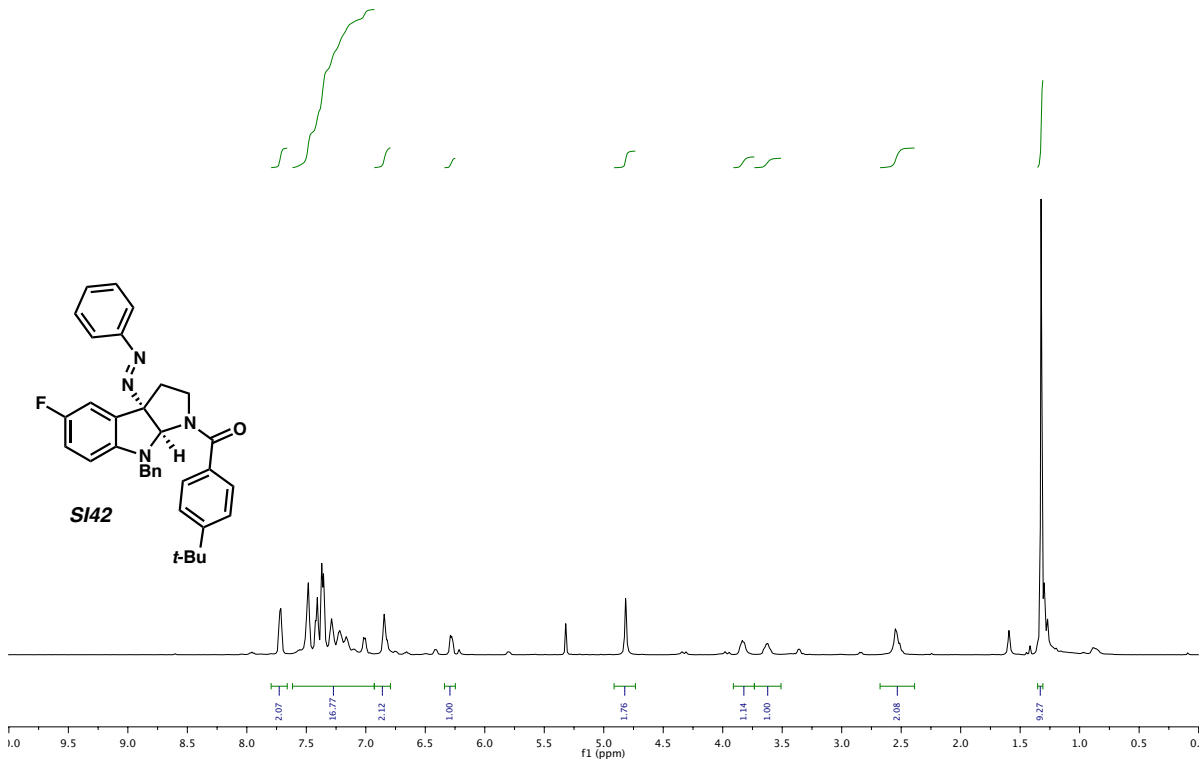

hmn-ii-161b.2.fid  
 DRX-500 5mm Z80 probe 13C staging parameters  
 With CPD proton decoupling Use ns\*td03scans

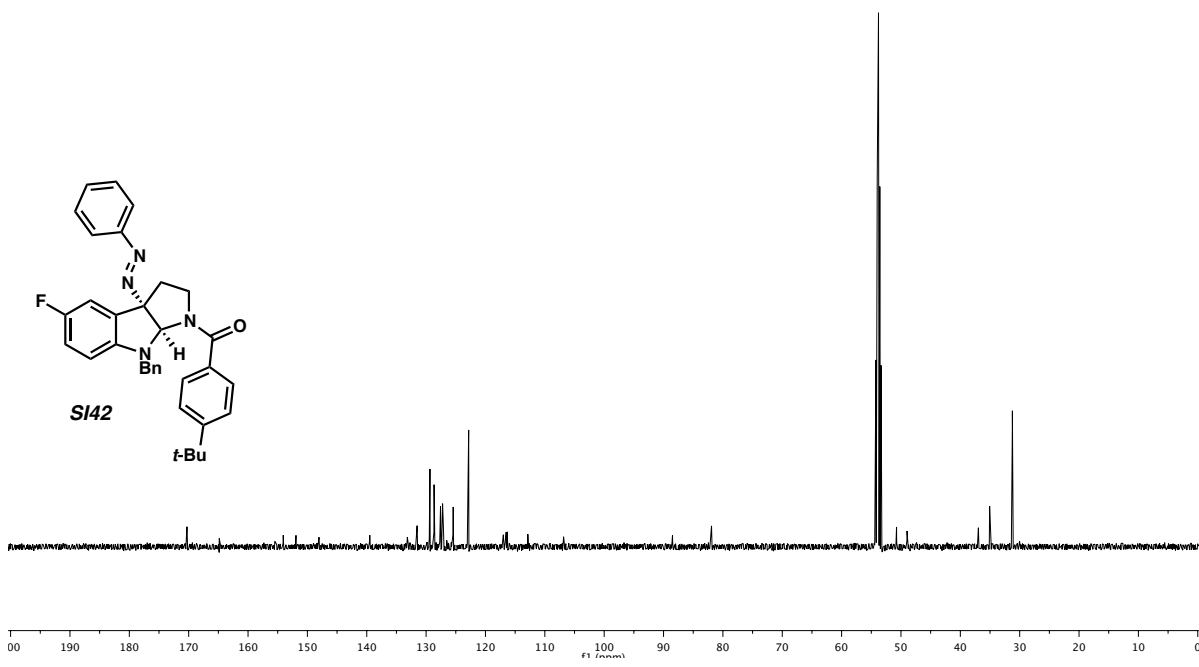

hmn-ii-99b-SOMe-Naph.2.fid  
 1H starting parameters (20.30)  
 DRX-500 TBIC  
 061212 CGC

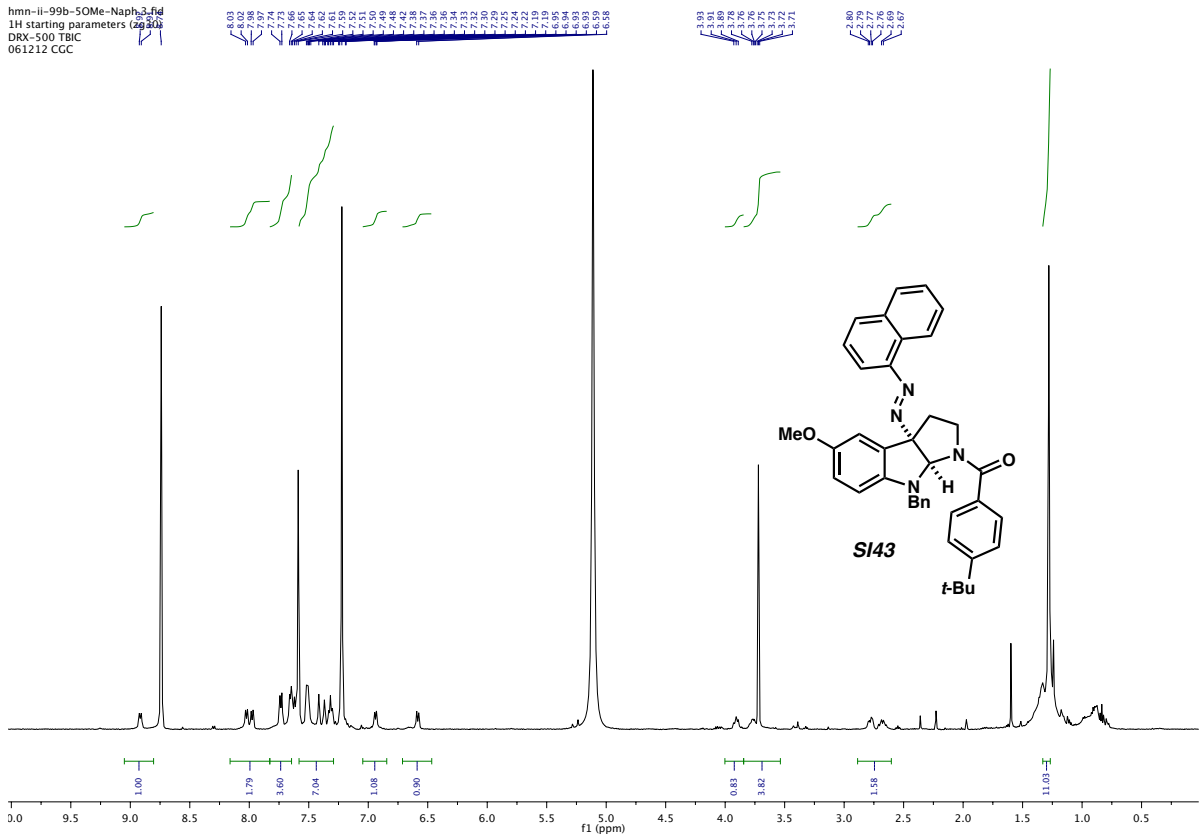

hmn-ii-99b-SOMe-Naph.2.fid  
 DRX-500 5mm ZBO probe 13C starting parameters (20.30)  
 With CPD proton decoupling. Use ns\*td0 scans

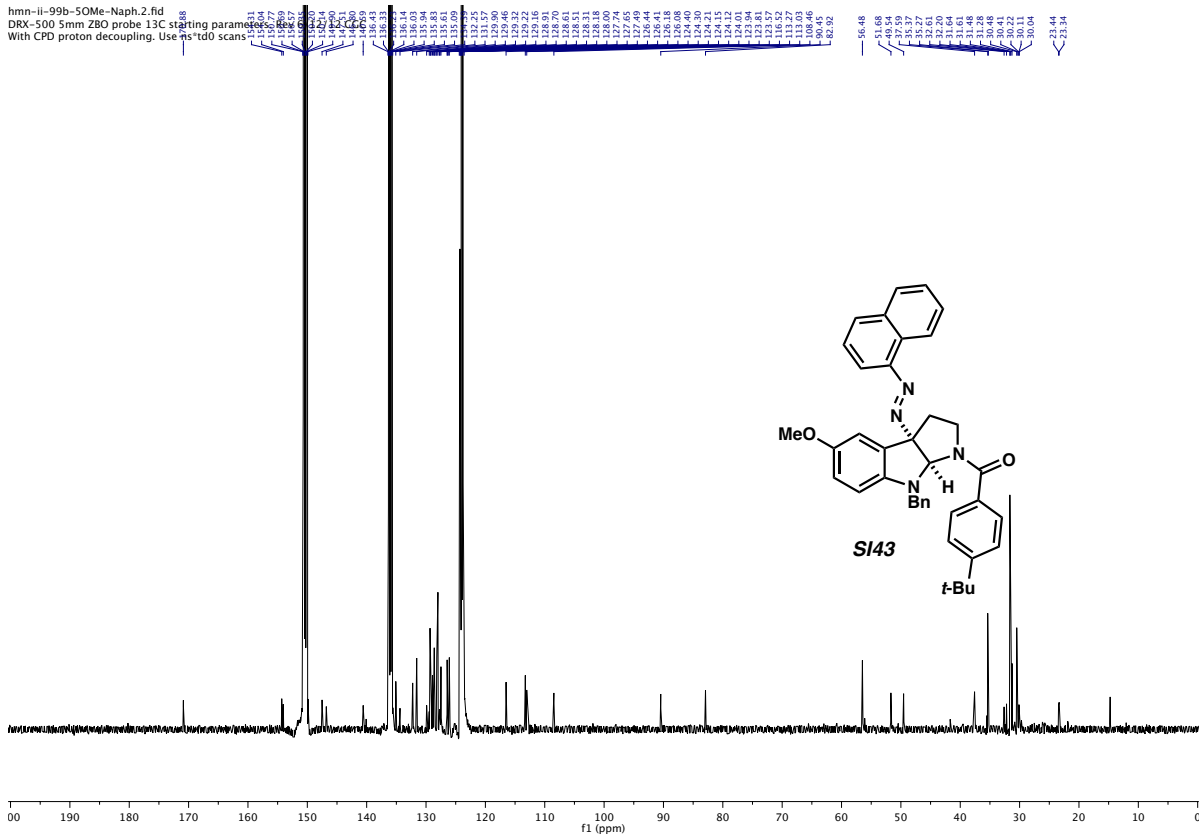





HMN-ii-165b.1.fid  
 1H starting parameters (zg30)  
 DRX-500 TBIC  
 061212 CGC

7.70  
7.70  
7.69  
7.48  
7.44  
7.43  
7.40  
7.39  
7.34  
7.16  
7.14  
6.81  
6.81  
6.80  
6.71  
6.70  
6.47  
6.45  
5.32  
4.82  
4.78  
4.74  
4.37  
4.09  
3.99  
3.99  
3.74  
3.71  
3.69  
3.68  
3.55  
3.54  
3.44  
2.67  
2.60  
2.58  
2.57  
2.55  
2.54  
2.51  
2.50  
2.01 H<sub>2</sub>O  
1.62  
1.39  
1.25  
1.24  
0.99  
0.88

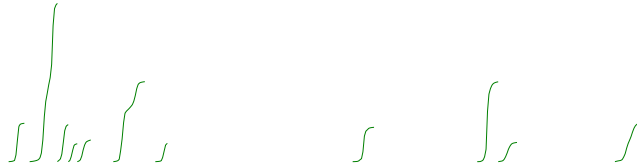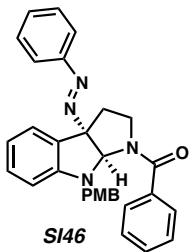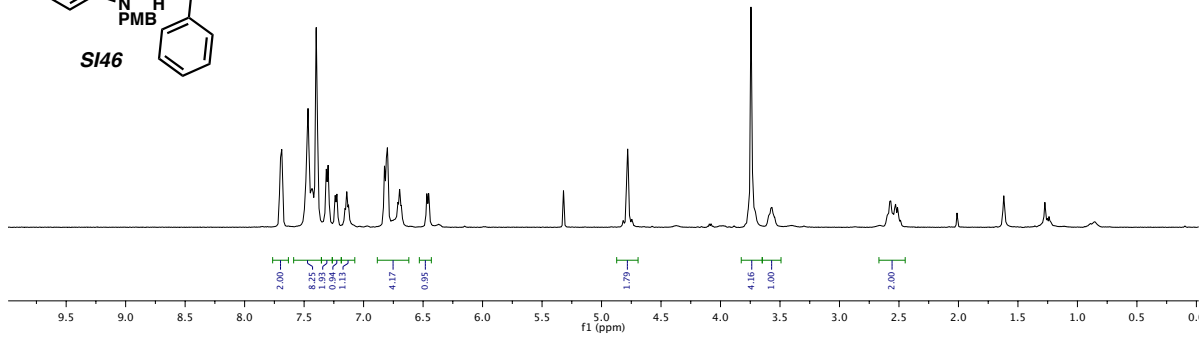

HMN-ii-165b.2.fid  
 DRX-500 5mm Z80 probe 13C starting parameters, Rev 2/12/12 CGC  
 With CPD proton decoupling. Use ms1td0 scans

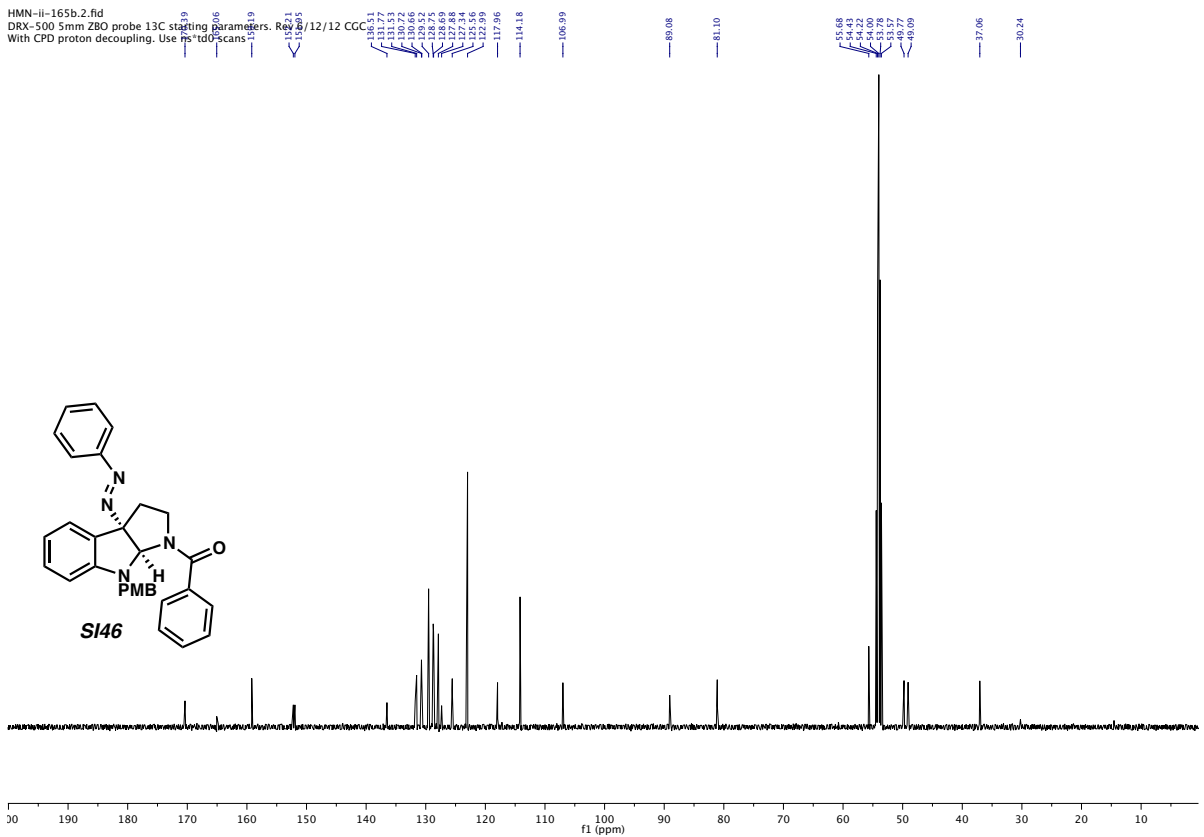



HMN-ii-119b.1.fid  
1H starting parameters (zg30)  
DRX-500 TBIC  
061212 CGC

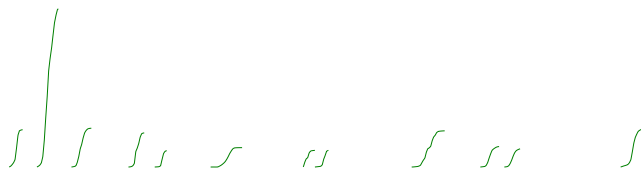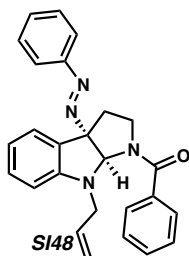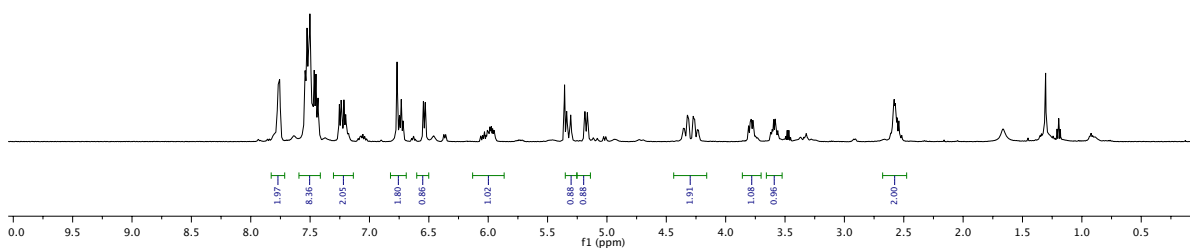

HMN-ii-119b.2.fid  
DRX-500 5mm Z80 probe 13C starting parameters. Rea 6/12/12 CGC  
With CPD proton decoupling. Use ms\*td0 scans

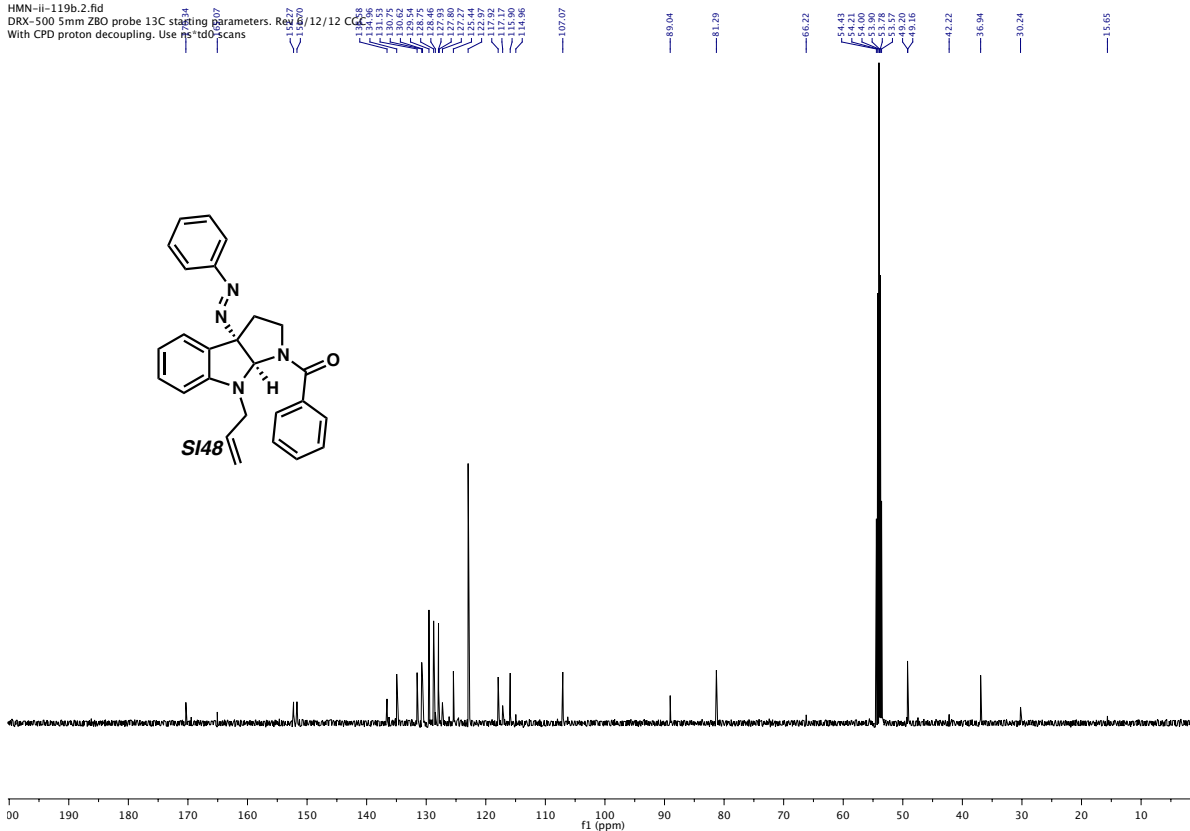

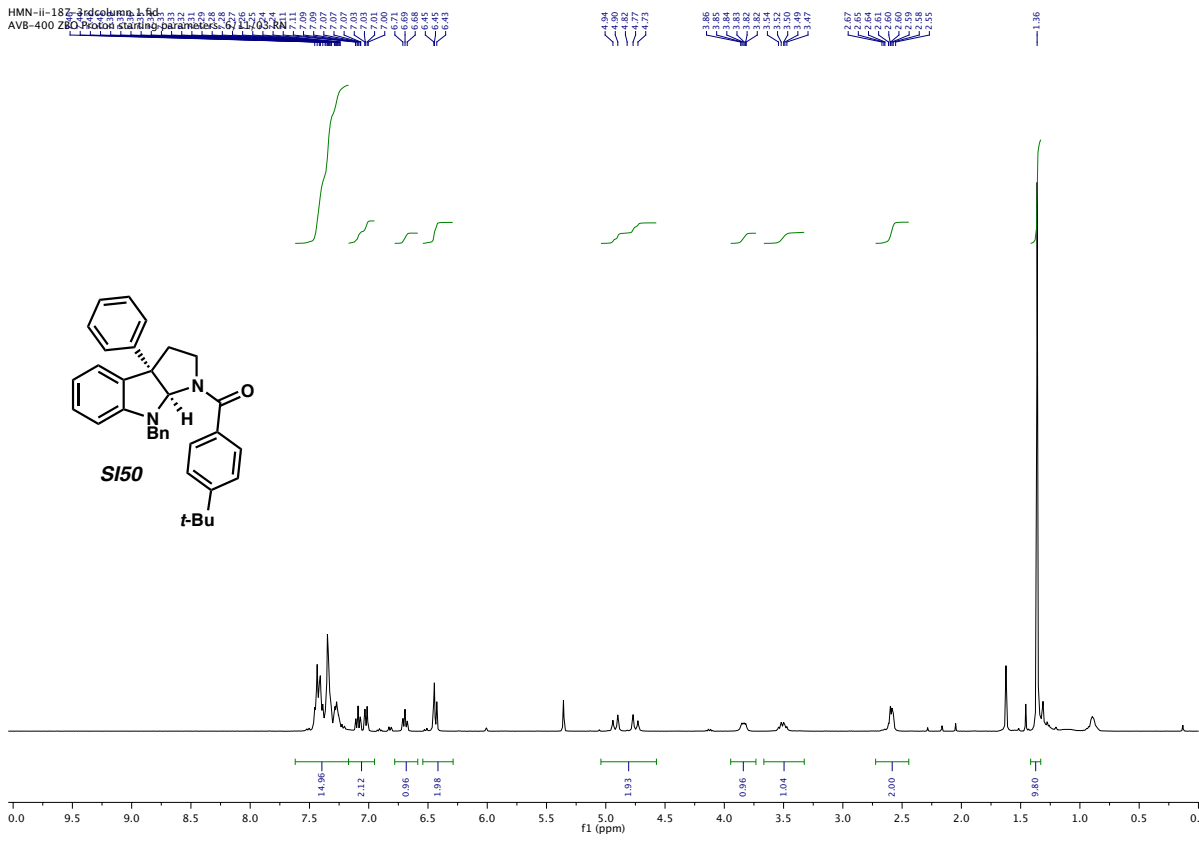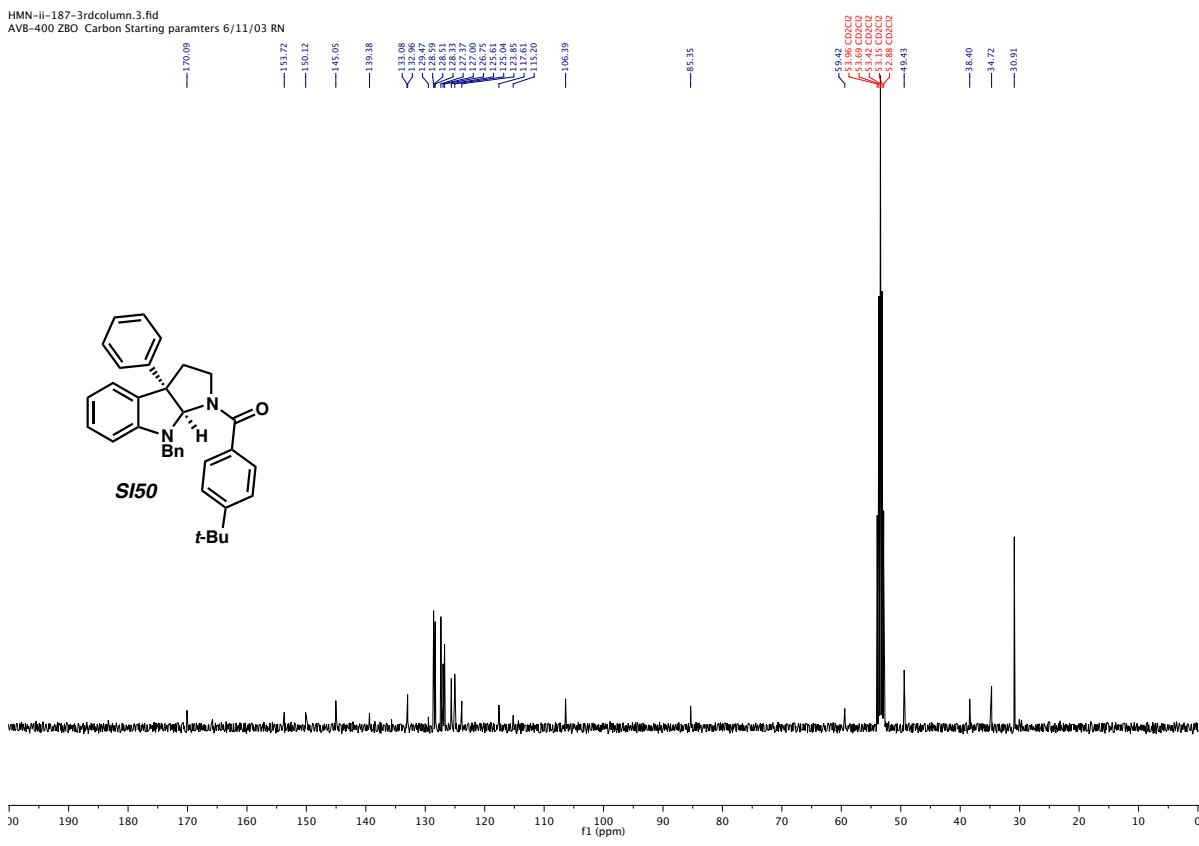

## V. X-Ray Data for SI28.

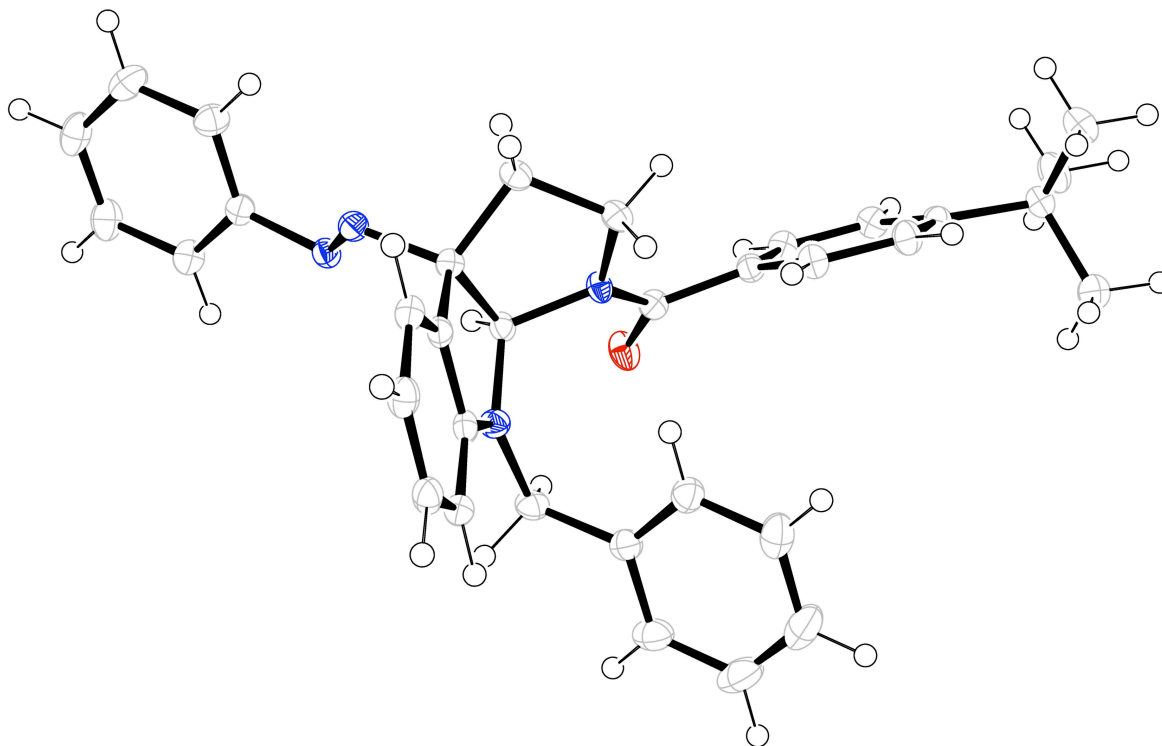

A yellow prism 0.120 x 0.060 x 0.030 mm in size was mounted on a Cryoloop with Paratone oil. Data were collected in a nitrogen gas stream at 100(2) K using phi and omega scans. Crystal-to-detector distance was 60 mm and exposure time was 5 seconds per frame using a scan width of 1.0°. Data collection was 99.2% complete to 67.000° in  $\theta$ . A total of 30604 reflections were collected covering the indices,  $-15 \leq h \leq 15$ ,  $-6 \leq k \leq 7$ ,  $-21 \leq l \leq 21$ . 4714 reflections were found to be symmetry independent, with an  $R_{\text{int}}$  of 0.0220. Indexing and unit cell refinement indicated a primitive, monoclinic lattice. The space group was found to be P 21 (No. 4). The data were integrated using the Bruker SAINT software program and scaled using the SADABS software program. Solution by iterative methods (SHELXT) produced a complete heavy-atom phasing model consistent with the proposed structure. All non-hydrogen atoms were refined anisotropically by full-matrix least-squares (SHELXL-2013). All hydrogen atoms were placed using a riding model. Their positions were constrained relative to their parent atom using the appropriate HFIX command in SHELXL-2013. Absolute stereochemistry

was unambiguously determined to be  $S$  at C1 and  $R$  at C8, respectively.

Table 1. Crystal data and structure refinement for toste81.

|                                   |                                             |                              |
|-----------------------------------|---------------------------------------------|------------------------------|
| X-ray ID                          | toste81                                     |                              |
| Sample/notebook ID                | SR-1-6E                                     |                              |
| Empirical formula                 | C34 H34 N4 O                                |                              |
| Formula weight                    | 514.65                                      |                              |
| Temperature                       | 100(2) K                                    |                              |
| Wavelength                        | 1.54178 Å                                   |                              |
| Crystal system                    | Monoclinic                                  |                              |
| Space group                       | P 21                                        |                              |
| Unit cell dimensions              | a = 12.5207(8) Å                            | $\alpha = 90^\circ$ .        |
|                                   | b = 6.2144(4) Å                             | $\beta = 102.219(2)^\circ$ . |
|                                   | c = 18.0695(12) Å                           | $\gamma = 90^\circ$ .        |
| Volume                            | 1374.11(15) Å <sup>3</sup>                  |                              |
| Z                                 | 2                                           |                              |
| Density (calculated)              | 1.244 Mg/m <sup>3</sup>                     |                              |
| Absorption coefficient            | 0.593 mm <sup>-1</sup>                      |                              |
| F(000)                            | 548                                         |                              |
| Crystal size                      | 0.120 x 0.060 x 0.030 mm <sup>3</sup>       |                              |
| Crystal color/habit               | yellow prism                                |                              |
| Theta range for data collection   | 2.502 to 68.223°.                           |                              |
| Index ranges                      | -15 ≤ h ≤ 15, -6 ≤ k ≤ 7, -21 ≤ l ≤ 21      |                              |
| Reflections collected             | 30604                                       |                              |
| Independent reflections           | 4714 [R(int) = 0.0220]                      |                              |
| Completeness to theta = 67.000°   | 99.2 %                                      |                              |
| Absorption correction             | Semi-empirical from equivalents             |                              |
| Max. and min. transmission        | 0.929 and 0.894                             |                              |
| Refinement method                 | Full-matrix least-squares on F <sup>2</sup> |                              |
| Data / restraints / parameters    | 4714 / 1 / 355                              |                              |
| Goodness-of-fit on F <sup>2</sup> | 1.039                                       |                              |
| Final R indices [I > 2σ(I)]       | R1 = 0.0256, wR2 = 0.0669                   |                              |
| R indices (all data)              | R1 = 0.0258, wR2 = 0.0672                   |                              |
| Absolute structure parameter      | 0.09(7)                                     |                              |
| Extinction coefficient            | n/a                                         |                              |
| Largest diff. peak and hole       | 0.163 and -0.167 e.Å <sup>-3</sup>          |                              |



Table 2. Atomic coordinates ( $\times 10^4$ ) and equivalent isotropic displacement parameters ( $\text{\AA}^2 \times 10^3$ ) for toste81.  $U(\text{eq})$  is defined as one third of the trace of the orthogonalized  $U^{ij}$  tensor.

|       | x        | y        | z        | $U(\text{eq})$ |
|-------|----------|----------|----------|----------------|
| C(1)  | 8725(1)  | 2000(3)  | 7873(1)  | 16(1)          |
| C(2)  | 8742(1)  | 1202(3)  | 8671(1)  | 18(1)          |
| C(3)  | 9260(1)  | -543(3)  | 9059(1)  | 20(1)          |
| C(4)  | 9162(1)  | -876(3)  | 9808(1)  | 23(1)          |
| C(5)  | 8560(1)  | 551(3)   | 10146(1) | 23(1)          |
| C(6)  | 8025(1)  | 2309(3)  | 9757(1)  | 21(1)          |
| C(7)  | 8111(1)  | 2599(3)  | 9007(1)  | 18(1)          |
| C(8)  | 7814(1)  | 3749(3)  | 7750(1)  | 17(1)          |
| C(9)  | 7112(1)  | 410(3)   | 7121(1)  | 18(1)          |
| C(10) | 8352(1)  | 319(3)   | 7252(1)  | 19(1)          |
| C(11) | 11006(1) | 5210(3)  | 7585(1)  | 19(1)          |
| C(12) | 11349(1) | 7313(3)  | 7742(1)  | 24(1)          |
| C(13) | 12384(1) | 7924(3)  | 7652(1)  | 28(1)          |
| C(14) | 13048(1) | 6456(3)  | 7383(1)  | 28(1)          |
| C(15) | 12675(1) | 4404(3)  | 7192(1)  | 29(1)          |
| C(16) | 11656(1) | 3758(3)  | 7292(1)  | 24(1)          |
| C(17) | 6853(1)  | 5714(3)  | 8673(1)  | 22(1)          |
| C(18) | 5793(1)  | 4758(3)  | 8808(1)  | 22(1)          |
| C(19) | 5129(1)  | 6024(4)  | 9158(1)  | 30(1)          |
| C(20) | 4146(2)  | 5227(4)  | 9284(1)  | 39(1)          |
| C(21) | 3815(1)  | 3173(4)  | 9069(1)  | 37(1)          |
| C(22) | 4476(1)  | 1886(4)  | 8729(1)  | 31(1)          |
| C(23) | 5457(1)  | 2674(3)  | 8598(1)  | 24(1)          |
| C(24) | 6068(1)  | 3911(3)  | 6821(1)  | 19(1)          |
| C(25) | 5120(1)  | 2818(3)  | 6312(1)  | 18(1)          |
| C(26) | 4673(1)  | 868(3)   | 6481(1)  | 20(1)          |
| C(27) | 3711(1)  | 99(3)    | 6029(1)  | 21(1)          |
| C(28) | 3167(1)  | 1222(3)  | 5390(1)  | 18(1)          |
| C(29) | 3649(1)  | 3112(3)  | 5207(1)  | 21(1)          |
| C(30) | 4599(1)  | 3917(3)  | 5663(1)  | 20(1)          |
| C(31) | 2058(1)  | 405(3)   | 4946(1)  | 20(1)          |
| C(32) | 2133(1)  | -1976(3) | 4748(1)  | 28(1)          |
| C(33) | 1218(1)  | 668(3)   | 5448(1)  | 29(1)          |
| C(34) | 1661(2)  | 1661(3)  | 4210(1)  | 30(1)          |

|      |         |         |         |       |
|------|---------|---------|---------|-------|
| N(1) | 7635(1) | 4173(2) | 8503(1) | 18(1) |
| N(2) | 6891(1) | 2700(2) | 7226(1) | 17(1) |
| N(3) | 9839(1) | 2688(2) | 7820(1) | 18(1) |
| N(4) | 9937(1) | 4645(2) | 7699(1) | 18(1) |
| O(1) | 6077(1) | 5889(2) | 6878(1) | 26(1) |

Table 3. Bond lengths [Å] and angles [°] for *toste81*.

|              |            |              |          |
|--------------|------------|--------------|----------|
| C(1)-N(3)    | 1.4815(19) | C(13)-H(13)  | 0.9500   |
| C(1)-C(2)    | 1.521(2)   | C(14)-C(15)  | 1.377(3) |
| C(1)-C(10)   | 1.532(2)   | C(14)-H(14)  | 0.9500   |
| C(1)-C(8)    | 1.557(2)   | C(15)-C(16)  | 1.386(2) |
| C(2)-C(3)    | 1.377(2)   | C(15)-H(15)  | 0.9500   |
| C(2)-C(7)    | 1.396(2)   | C(16)-H(16)  | 0.9500   |
| C(3)-C(4)    | 1.400(2)   | C(17)-N(1)   | 1.448(2) |
| C(3)-H(3)    | 0.9500     | C(17)-C(18)  | 1.520(2) |
| C(4)-C(5)    | 1.386(2)   | C(17)-H(17A) | 0.9900   |
| C(4)-H(4)    | 0.9500     | C(17)-H(17B) | 0.9900   |
| C(5)-C(6)    | 1.392(2)   | C(18)-C(23)  | 1.389(3) |
| C(5)-H(5)    | 0.9500     | C(18)-C(19)  | 1.390(2) |
| C(6)-C(7)    | 1.394(2)   | C(19)-C(20)  | 1.390(3) |
| C(6)-H(6)    | 0.9500     | C(19)-H(19)  | 0.9500   |
| C(7)-N(1)    | 1.382(2)   | C(20)-C(21)  | 1.372(3) |
| C(8)-N(1)    | 1.450(2)   | C(20)-H(20)  | 0.9500   |
| C(8)-N(2)    | 1.4813(18) | C(21)-C(22)  | 1.385(3) |
| C(8)-H(8)    | 1.0000     | C(21)-H(21)  | 0.9500   |
| C(9)-N(2)    | 1.470(2)   | C(22)-C(23)  | 1.388(2) |
| C(9)-C(10)   | 1.521(2)   | C(22)-H(22)  | 0.9500   |
| C(9)-H(9A)   | 0.9900     | C(23)-H(23)  | 0.9500   |
| C(9)-H(9B)   | 0.9900     | C(24)-O(1)   | 1.233(2) |
| C(10)-H(10A) | 0.9900     | C(24)-N(2)   | 1.358(2) |
| C(10)-H(10B) | 0.9900     | C(24)-C(25)  | 1.502(2) |
| C(11)-C(12)  | 1.387(2)   | C(25)-C(30)  | 1.393(2) |
| C(11)-C(16)  | 1.392(2)   | C(25)-C(26)  | 1.395(2) |
| C(11)-N(4)   | 1.4407(19) | C(26)-C(27)  | 1.389(2) |
| C(12)-C(13)  | 1.392(2)   | C(26)-H(26)  | 0.9500   |
| C(12)-H(12)  | 0.9500     | C(27)-C(28)  | 1.397(2) |
| C(13)-C(14)  | 1.390(3)   | C(27)-H(27)  | 0.9500   |

|                 |            |                     |            |
|-----------------|------------|---------------------|------------|
| C(28)-C(29)     | 1.392(2)   | C(32)-H(32B)        | 0.9800     |
| C(28)-C(31)     | 1.536(2)   | C(32)-H(32C)        | 0.9800     |
| C(29)-C(30)     | 1.390(2)   | C(33)-H(33A)        | 0.9800     |
| C(29)-H(29)     | 0.9500     | C(33)-H(33B)        | 0.9800     |
| C(30)-H(30)     | 0.9500     | C(33)-H(33C)        | 0.9800     |
| C(31)-C(32)     | 1.530(3)   | C(34)-H(34A)        | 0.9800     |
| C(31)-C(34)     | 1.532(2)   | C(34)-H(34B)        | 0.9800     |
| C(31)-C(33)     | 1.536(2)   | C(34)-H(34C)        | 0.9800     |
| C(32)-H(32A)    | 0.9800     | N(3)-N(4)           | 1.246(2)   |
|                 |            |                     |            |
| N(3)-C(1)-C(2)  | 109.30(11) | N(2)-C(8)-C(1)      | 103.47(12) |
| N(3)-C(1)-C(10) | 107.16(12) | N(1)-C(8)-H(8)      | 111.1      |
| C(2)-C(1)-C(10) | 114.42(13) | N(2)-C(8)-H(8)      | 111.1      |
| N(3)-C(1)-C(8)  | 117.46(13) | C(1)-C(8)-H(8)      | 111.1      |
| C(2)-C(1)-C(8)  | 103.04(12) | N(2)-C(9)-C(10)     | 103.25(12) |
| C(10)-C(1)-C(8) | 105.69(12) | N(2)-C(9)-H(9A)     | 111.1      |
| C(3)-C(2)-C(7)  | 121.16(14) | C(10)-C(9)-H(9A)    | 111.1      |
| C(3)-C(2)-C(1)  | 130.55(15) | N(2)-C(9)-H(9B)     | 111.1      |
| C(7)-C(2)-C(1)  | 108.28(13) | C(10)-C(9)-H(9B)    | 111.1      |
| C(2)-C(3)-C(4)  | 118.70(15) | H(9A)-C(9)-H(9B)    | 109.1      |
| C(2)-C(3)-H(3)  | 120.7      | C(9)-C(10)-C(1)     | 103.42(12) |
| C(4)-C(3)-H(3)  | 120.7      | C(9)-C(10)-H(10A)   | 111.1      |
| C(5)-C(4)-C(3)  | 119.90(16) | C(1)-C(10)-H(10A)   | 111.1      |
| C(5)-C(4)-H(4)  | 120.0      | C(9)-C(10)-H(10B)   | 111.1      |
| C(3)-C(4)-H(4)  | 120.0      | C(1)-C(10)-H(10B)   | 111.1      |
| C(4)-C(5)-C(6)  | 121.86(14) | H(10A)-C(10)-H(10B) | 109.0      |
| C(4)-C(5)-H(5)  | 119.1      | C(12)-C(11)-C(16)   | 120.53(15) |
| C(6)-C(5)-H(5)  | 119.1      | C(12)-C(11)-N(4)    | 117.22(14) |
| C(5)-C(6)-C(7)  | 117.69(15) | C(16)-C(11)-N(4)    | 122.17(15) |
| C(5)-C(6)-H(6)  | 121.2      | C(11)-C(12)-C(13)   | 119.28(16) |
| C(7)-C(6)-H(6)  | 121.2      | C(11)-C(12)-H(12)   | 120.4      |
| N(1)-C(7)-C(6)  | 128.33(15) | C(13)-C(12)-H(12)   | 120.4      |
| N(1)-C(7)-C(2)  | 111.05(13) | C(14)-C(13)-C(12)   | 120.19(18) |
| C(6)-C(7)-C(2)  | 120.62(15) | C(14)-C(13)-H(13)   | 119.9      |
| N(1)-C(8)-N(2)  | 115.22(12) | C(12)-C(13)-H(13)   | 119.9      |
| N(1)-C(8)-C(1)  | 104.32(12) | C(15)-C(14)-C(13)   | 119.92(16) |

|                     |            |                     |            |
|---------------------|------------|---------------------|------------|
| C(15)-C(14)-H(14)   | 120.0      | C(30)-C(25)-C(24)   | 117.51(15) |
| C(13)-C(14)-H(14)   | 120.0      | C(26)-C(25)-C(24)   | 124.08(14) |
| C(14)-C(15)-C(16)   | 120.57(17) | C(27)-C(26)-C(25)   | 120.56(14) |
| C(14)-C(15)-H(15)   | 119.7      | C(27)-C(26)-H(26)   | 119.7      |
| C(16)-C(15)-H(15)   | 119.7      | C(25)-C(26)-H(26)   | 119.7      |
| C(15)-C(16)-C(11)   | 119.36(17) | C(26)-C(27)-C(28)   | 121.63(15) |
| C(15)-C(16)-H(16)   | 120.3      | C(26)-C(27)-H(27)   | 119.2      |
| C(11)-C(16)-H(16)   | 120.3      | C(28)-C(27)-H(27)   | 119.2      |
| N(1)-C(17)-C(18)    | 115.33(15) | C(29)-C(28)-C(27)   | 117.24(14) |
| N(1)-C(17)-H(17A)   | 108.4      | C(29)-C(28)-C(31)   | 122.96(14) |
| C(18)-C(17)-H(17A)  | 108.4      | C(27)-C(28)-C(31)   | 119.74(14) |
| N(1)-C(17)-H(17B)   | 108.4      | C(30)-C(29)-C(28)   | 121.52(15) |
| C(18)-C(17)-H(17B)  | 108.4      | C(30)-C(29)-H(29)   | 119.2      |
| H(17A)-C(17)-H(17B) | 107.5      | C(28)-C(29)-H(29)   | 119.2      |
| C(23)-C(18)-C(19)   | 118.42(16) | C(29)-C(30)-C(25)   | 120.78(15) |
| C(23)-C(18)-C(17)   | 123.04(15) | C(29)-C(30)-H(30)   | 119.6      |
| C(19)-C(18)-C(17)   | 118.55(16) | C(25)-C(30)-H(30)   | 119.6      |
| C(18)-C(19)-C(20)   | 120.6(2)   | C(32)-C(31)-C(34)   | 108.28(14) |
| C(18)-C(19)-H(19)   | 119.7      | C(32)-C(31)-C(28)   | 110.35(14) |
| C(20)-C(19)-H(19)   | 119.7      | C(34)-C(31)-C(28)   | 112.12(13) |
| C(21)-C(20)-C(19)   | 120.61(18) | C(32)-C(31)-C(33)   | 108.98(15) |
| C(21)-C(20)-H(20)   | 119.7      | C(34)-C(31)-C(33)   | 108.82(14) |
| C(19)-C(20)-H(20)   | 119.7      | C(28)-C(31)-C(33)   | 108.24(13) |
| C(20)-C(21)-C(22)   | 119.37(17) | C(31)-C(32)-H(32A)  | 109.5      |
| C(20)-C(21)-H(21)   | 120.3      | C(31)-C(32)-H(32B)  | 109.5      |
| C(22)-C(21)-H(21)   | 120.3      | H(32A)-C(32)-H(32B) | 109.5      |
| C(21)-C(22)-C(23)   | 120.3(2)   | C(31)-C(32)-H(32C)  | 109.5      |
| C(21)-C(22)-H(22)   | 119.8      | H(32A)-C(32)-H(32C) | 109.5      |
| C(23)-C(22)-H(22)   | 119.8      | H(32B)-C(32)-H(32C) | 109.5      |
| C(22)-C(23)-C(18)   | 120.69(17) | C(31)-C(33)-H(33A)  | 109.5      |
| C(22)-C(23)-H(23)   | 119.7      | C(31)-C(33)-H(33B)  | 109.5      |
| C(18)-C(23)-H(23)   | 119.7      | H(33A)-C(33)-H(33B) | 109.5      |
| O(1)-C(24)-N(2)     | 120.99(14) | C(31)-C(33)-H(33C)  | 109.5      |
| O(1)-C(24)-C(25)    | 119.60(14) | H(33A)-C(33)-H(33C) | 109.5      |
| N(2)-C(24)-C(25)    | 119.38(14) | H(33B)-C(33)-H(33C) | 109.5      |
| C(30)-C(25)-C(26)   | 118.17(14) | C(31)-C(34)-H(34A)  | 109.5      |

|                     |            |
|---------------------|------------|
| C(31)-C(34)-H(34B)  | 109.5      |
| H(34A)-C(34)-H(34B) | 109.5      |
| C(31)-C(34)-H(34C)  | 109.5      |
| H(34A)-C(34)-H(34C) | 109.5      |
| H(34B)-C(34)-H(34C) | 109.5      |
| C(7)-N(1)-C(17)     | 123.03(13) |
| C(7)-N(1)-C(8)      | 110.99(13) |
| C(17)-N(1)-C(8)     | 124.44(13) |
| C(24)-N(2)-C(9)     | 127.54(13) |
| C(24)-N(2)-C(8)     | 120.05(13) |
| C(9)-N(2)-C(8)      | 111.48(12) |
| N(4)-N(3)-C(1)      | 114.91(13) |
| N(3)-N(4)-C(11)     | 113.03(13) |

---

Symmetry transformations used to generate equivalent atoms:

Table 4. Anisotropic displacement parameters ( $\text{\AA}^2 \times 10^3$ ) for *toste81*. The anisotropic displacement factor exponent takes the form:  $-2\pi^2 [ h^2 a^{*2} U^{11} + \dots + 2 h k a^* b^* U^{12} ]$

---

|       | U <sup>11</sup> | U <sup>22</sup> | U <sup>33</sup> | U <sup>23</sup> | U <sup>13</sup> | U <sup>12</sup> |
|-------|-----------------|-----------------|-----------------|-----------------|-----------------|-----------------|
| C(1)  | 17(1)           | 15(1)           | 18(1)           | 1(1)            | 4(1)            | 0(1)            |
| C(2)  | 14(1)           | 21(1)           | 17(1)           | -1(1)           | 2(1)            | -4(1)           |
| C(3)  | 16(1)           | 20(1)           | 23(1)           | 1(1)            | 3(1)            | -1(1)           |
| C(4)  | 19(1)           | 25(1)           | 22(1)           | 6(1)            | 1(1)            | -2(1)           |
| C(5)  | 19(1)           | 33(1)           | 16(1)           | 2(1)            | 2(1)            | -5(1)           |
| C(6)  | 17(1)           | 28(1)           | 19(1)           | -3(1)           | 4(1)            | -3(1)           |
| C(7)  | 14(1)           | 18(1)           | 20(1)           | -1(1)           | 2(1)            | -4(1)           |
| C(8)  | 16(1)           | 15(1)           | 19(1)           | -2(1)           | 3(1)            | -2(1)           |
| C(9)  | 22(1)           | 13(1)           | 20(1)           | 0(1)            | 2(1)            | 0(1)            |
| C(10) | 23(1)           | 16(1)           | 18(1)           | 0(1)            | 3(1)            | 1(1)            |
| C(11) | 18(1)           | 21(1)           | 17(1)           | 3(1)            | 3(1)            | 0(1)            |
| C(12) | 22(1)           | 22(1)           | 26(1)           | 2(1)            | 4(1)            | 0(1)            |
| C(13) | 24(1)           | 25(1)           | 33(1)           | 7(1)            | 3(1)            | -4(1)           |
| C(14) | 20(1)           | 37(1)           | 28(1)           | 13(1)           | 5(1)            | -2(1)           |
| C(15) | 26(1)           | 35(1)           | 30(1)           | 5(1)            | 13(1)           | 5(1)            |
| C(16) | 26(1)           | 23(1)           | 24(1)           | 1(1)            | 9(1)            | 0(1)            |
| C(17) | 24(1)           | 17(1)           | 25(1)           | -4(1)           | 5(1)            | 3(1)            |
| C(18) | 20(1)           | 26(1)           | 17(1)           | 1(1)            | 2(1)            | 4(1)            |
| C(19) | 30(1)           | 36(1)           | 24(1)           | -3(1)           | 5(1)            | 10(1)           |
| C(20) | 29(1)           | 60(2)           | 31(1)           | 2(1)            | 11(1)           | 16(1)           |
| C(21) | 21(1)           | 60(2)           | 31(1)           | 12(1)           | 7(1)            | 3(1)            |
| C(22) | 23(1)           | 39(1)           | 30(1)           | 7(1)            | 2(1)            | -4(1)           |
| C(23) | 21(1)           | 28(1)           | 24(1)           | 1(1)            | 4(1)            | 1(1)            |
| C(24) | 20(1)           | 15(1)           | 22(1)           | 1(1)            | 5(1)            | 0(1)            |
| C(25) | 17(1)           | 17(1)           | 20(1)           | -1(1)           | 3(1)            | 1(1)            |
| C(26) | 21(1)           | 19(1)           | 20(1)           | 3(1)            | 2(1)            | 0(1)            |
| C(27) | 22(1)           | 18(1)           | 22(1)           | 2(1)            | 4(1)            | -3(1)           |
| C(28) | 18(1)           | 18(1)           | 17(1)           | -2(1)           | 4(1)            | 1(1)            |
| C(29) | 22(1)           | 20(1)           | 19(1)           | 3(1)            | 2(1)            | 2(1)            |

|       |       |       |       |       |       |       |
|-------|-------|-------|-------|-------|-------|-------|
| C(30) | 21(1) | 14(1) | 25(1) | 3(1)  | 5(1)  | 1(1)  |
| C(31) | 21(1) | 19(1) | 20(1) | -1(1) | 2(1)  | -2(1) |
| C(32) | 31(1) | 25(1) | 27(1) | -5(1) | 1(1)  | -3(1) |
| C(33) | 22(1) | 36(1) | 28(1) | -5(1) | 3(1)  | -2(1) |
| C(34) | 30(1) | 31(1) | 25(1) | 1(1)  | -5(1) | -4(1) |
| N(1)  | 19(1) | 18(1) | 19(1) | -1(1) | 4(1)  | 2(1)  |
| N(2)  | 17(1) | 14(1) | 19(1) | -1(1) | 1(1)  | -2(1) |
| N(3)  | 19(1) | 19(1) | 18(1) | 0(1)  | 5(1)  | -1(1) |
| N(4)  | 19(1) | 18(1) | 17(1) | -1(1) | 3(1)  | -2(1) |
| O(1)  | 25(1) | 14(1) | 33(1) | 0(1)  | -3(1) | 0(1)  |

Table 5. Hydrogen coordinates (x

$10^4$ ) and isotropic displacement parameters ( $\text{\AA}^2 \times 10^{-3}$ )

for toste81.

|        | x     | y     | z     | U(eq) |
|--------|-------|-------|-------|-------|
| H(3)   | 9676  | -1503 | 8823  | 24    |
| H(4)   | 9507  | -2077 | 10085 | 27    |
| H(5)   | 8511  | 322   | 10658 | 28    |
| H(6)   | 7615  | 3277  | 9994  | 25    |
| H(8)   | 8054  | 5079  | 7520  | 20    |
| H(9A)  | 6769  | -74   | 6603  | 22    |
| H(9B)  | 6839  | -493  | 7493  | 22    |
| H(10A) | 8606  | 696   | 6785  | 23    |
| H(10B) | 8628  | -1130 | 7422  | 23    |
| H(12)  | 10884 | 8326  | 7909  | 28    |
| H(13)  | 12636 | 9347  | 7775  | 33    |
| H(14)  | 13759 | 6869  | 7331  | 34    |
| H(15)  | 13120 | 3422  | 6989  | 35    |
| H(16)  | 11403 | 2337  | 7163  | 29    |
| H(17A) | 6675  | 6749  | 8248  | 26    |
| H(17B) | 7204  | 6533  | 9130  | 26    |
| H(19)  | 5350  | 7446  | 9312  | 36    |
| H(20)  | 3698  | 6112  | 9522  | 47    |
| H(21)  | 3140  | 2639  | 9153  | 44    |
| H(22)  | 4256  | 457   | 8584  | 38    |

|        |      |       |      |    |
|--------|------|-------|------|----|
| H(23)  | 5904 | 1779  | 8364 | 29 |
| H(26)  | 5030 | 60    | 6908 | 24 |
| H(27)  | 3417 | -1224 | 6158 | 25 |
| H(29)  | 3320 | 3869  | 4760 | 25 |
| H(30)  | 4897 | 5233  | 5532 | 24 |
| H(32A) | 1423 | -2470 | 4460 | 42 |
| H(32B) | 2340 | -2819 | 5215 | 42 |
| H(32C) | 2686 | -2163 | 4442 | 42 |
| H(33A) | 1171 | 2187  | 5584 | 44 |
| H(33B) | 1445 | -189  | 5910 | 44 |
| H(33C) | 501  | 173   | 5172 | 44 |
| H(34A) | 1559 | 3176  | 4328 | 46 |
| H(34B) | 965  | 1059  | 3936 | 46 |
| H(34C) | 2205 | 1550  | 3893 | 46 |

---

## **VI. References**

1. Gottlieb, H. E.; Kotlyar, V.; Nudelman, A. *J. Org. Chem.* **1997**, *62* (21), 7512.
2. Muratore, M. E.; Holloway, C. A.; Pilling, A. W.; Storer, R. I.; Trevitt, G.; Dixon, D. J. *J. Am. Chem. Soc.*, **2009**, *131*, 10796–10797.
3. Jin, H.; Zhang, P.; Bijian, K.; Ren, S.; Wan, S.; Alaoui-Jamali, M. A.; Jiang, T. *Mar. Drugs*, **2013**, *11*, 1427–1439.
4. Yamada, F.; Saida, Y.; Somei, M. *Heterocycles*, **1986**, *24*, 2619–2627.
5. Skylar, D.; Heathcock, C. H. *Org. Lett.*, **2001**, *3*, 4323–4324.
6. Bahr, J. L.; Yang, J.; Kosynkin, D. V.; Bronikowski, M. J.; Smalley, R. E.; Tour, J. M. *J. Am. Chem. Soc.* **2001**, *123*, 6536–6542.
7. Wang, W.; Wang, T.; Zhang, Y.; Tang, Z. *Synlett*, **2010**, *5*, 804–808
8. Takayama, H.; Bunnett, J.F. *J. Org. Chem.* **1968**, *33* (5), 1924–1928.
9. Masllorens, J.; Moreno-Manas, M.; Pia-Quintana, A.; Roglans, A. *Org. Lett.* **2003**, *5*, 1559–1562.
10. Hseuh-Hui, Y.; McCreery, R.L. *Anal. Chem.* **1999**, *71* (18), 4081–4087.
11. Korzeniowski, S.H.; Leopold, A.; Beadle, J.R.; Ahern, M.F.; Sheppard, W.A. *J. Org. Chem.* **1981**, *46* (10), 2153–2159.
12. Gosselin, F.; Lau, S.; Nadeau, C.; Trinh, T.; O'Shea, P.D.; Davies, I.W. *J. Org. Chem.* **2009**, *74* (20), 7790–7797.
13. Kalinin A. V.; Chauder, B. A.; Rakhit, R.; Snieckis, V. *Org. Lett.*, **2003**, *5* (19), 3519–3521.
14. Zhang, P.Y.; Wan, S. B.; Ren, S. M.; Jiang, T. *Chin. Chem. Lett.*, **2010**, *21*, 1307–1309./
